# Supplementary material for: The contribution of X-linked coding variation to severe developmental disorders
Source: Nat Commun. 2021 Jan 27;12:627. doi: 10.1038/s41467-020-20852-3 (PMC7840967; doi:10.1038/s41467-020-20852-3)
Supplement: Supplementary file 4 — Supplementary Data 1 [file 41467_2020_20852_MOESM4_ESM.xlsx]

## Sheet: results_from_FET_comparing_pres
Supplementary Data 1: Results from logistic regression comparing the prevalence of different phenotypic features amongst males versus females in DDD, controlling for age at assessment.
phenotypic anomaly	fraction with anomaly		logistic regression conditioning on age at assessment
	females	males	effect size for being male (beta)	Pr(>|z|)	odds ratio
ID, DD or language impairment	0.734603	0.757139	0.13451	0.000858274	1.14398
mild ID or DD	0.0681737	0.0740694	0.0955844	0.162094	1.1003
moderate ID or DD	0.139729	0.144314	0.0460903	0.359025	1.04717
severe ID or DD	0.123532	0.108746	-0.123987	0.0236708	0.883391
ID or DD of unknown severity	0.642043	0.644059	0.0181681	0.619797	1.01833
abnormal heart morphology	0.0998576	0.0897501	-0.132041	0.0270416	0.876305
abnormality nervous system physiology	0.824671	0.86002	0.289705	1.91966e-09	1.33603
abnormality of blood and blood forming tissues	0.0222499	0.0196328	-0.11631	0.339573	0.890199
abnormality of connective tissue	0.0679957	0.0838858	0.228212	0.000644041	1.25635
abnormality of higher brain funtion	0.0995016	0.102116	0.0546209	0.351368	1.05614
abnormality of limbs	0.361695	0.367032	0.0306622	0.400015	1.03114
abnormality of metabolism homeostasis	0.0432538	0.0390107	-0.111126	0.205657	0.894826
abnormality of nervous system morphology	0.371129	0.2936	-0.360058	3.79113e-22	0.697636
abnormality of prenatal development or birth	0.0532218	0.0517593	-0.0468541	0.551432	0.954227
abnormality of skull size	0.247419	0.208057	-0.235402	1.63031e-08	0.790253
abnormality of the breast	0.0322179	0.0399031	0.219808	0.0209919	1.24584
abnormality of the cardiovascular system	0.161623	0.145079	-0.140434	0.00383096	0.868981
abnormality of the digestive system	0.200249	0.199771	-0.0158513	0.717909	0.984274
abnormality of the ear	0.205589	0.221698	0.0994129	0.0202224	1.10452
abnormality of the endocrine system	0.0494838	0.0360785	-0.303368	0.000473128	0.738327
abnormality of the eye	0.372019	0.334396	-0.167105	4.89664e-06	0.846111
abnormality of the genitourinary system	0.0756497	0.1628	0.865063	1.30884e-48	2.37516
abnormality of the head or neck	0.706479	0.68256	-0.120448	0.00158319	0.886523
abnormality of the immune system	0.0605198	0.073177	0.201931	0.00438068	1.22376
abnormality of the integument	0.307049	0.317058	0.0463416	0.220188	1.04743
abnormality of the musculature	0.207903	0.198241	-0.0723608	0.0967044	0.930195
abnormality of the nervous system	0.874333	0.893804	0.205611	0.000171129	1.22828
abnormality of the respiratory system	0.0774297	0.0837583	0.0733412	0.257016	1.0761
abnormality of the skeletal system	0.640797	0.611423	-0.126564	0.000479333	0.881118
abnormality of the voice	0.011214	0.013386	0.200489	0.211758	1.222
abnormality of vision	0.0300819	0.0243498	-0.218822	0.041105	0.803465
ADHD	0.0133499	0.0261346	0.720079	1.34994e-07	2.0546
aggressive impulsive violent behavior	0.0388038	0.0493371	0.275299	0.00152704	1.31692
autistic behaviour	0.0925596	0.172361	0.73925	7.72997e-41	2.09436
behavioural abnormality	0.222677	0.300484	0.435832	1.85683e-26	1.54625
cleft	0.0393378	0.0385008	-0.0400161	0.658631	0.960774
increased head circumference	0.0452118	0.0657828	0.395518	5.16172e-07	1.48515
decreased head circumference	0.201673	0.141764	-0.438923	4.05793e-21	0.644731
growth abnormality	0.240655	0.219531	-0.108495	0.00910472	0.897183
hearing impairment	0.0808117	0.0671851	-0.193535	0.00367134	0.824041
hyperactivity	0.0206479	0.0391382	0.683195	6.75417e-10	1.9802
impaired social interactions	0.012282	0.0188679	0.435262	0.00304603	1.54537
neurological speech impairment	0.0496618	0.0471698	-0.0357512	0.660874	0.96488
polydactyly	0.0126379	0.0110913	-0.140158	0.384088	0.869221
scoliosis	0.0562478	0.036716	-0.416211	7.88003e-07	0.659541
seizures	0.199181	0.172489	-0.159031	0.000415185	0.85297
visual impairment	0.0208259	0.0165732	-0.242312	0.0600594	0.784811
