# Supplementary material for: The contribution of X-linked coding variation to severe developmental disorders
Source: Nat Commun. 2021 Jan 27;12:627. doi: 10.1038/s41467-020-20852-3 (PMC7840967; doi:10.1038/s41467-020-20852-3)
Supplement: Supplementary file 5 — Supplementary Data 2 [file 41467_2020_20852_MOESM5_ESM.xlsx]

## Sheet: denovos_that_passed_filtering.s
Supplementary Data 2: De novo mutations that passed our filtering and were used in the burden analysis and gene-based tests.
									depth (reference forward, reference reverse, alternate forward, alternate reverse)			Variant allele fraction
individual ID	sex	chrom	pos	reference	alternate	consequence	gene symbol	pp_dnm	child	father	mother	child	father	mother
258	F	X	128657227	C	T	missense_variant	SMARCA1	0.60499	8,31,5,7	5,12,0,0	13,24,2,3	0.235294	0	0.119048
213	F	X	48382344	G	A	missense_variant	EBP	0.912628	26,22,20,18	13,15,0,0	41,23,4,1	0.44186	0	0.0724638
407	F	X	57619166	C	T	missense_variant	ZXDB	0.00508292	6,3,1,3	4,5,0,0	11,6,1,0	0.307692	0	0.0555556
479	F	X	53264277	G	A	synonymous_variant	IQSEC2	0.976515	2,7,1,8	6,9,0,0	3,21,0,1	0.5	0	0.04
436	F	X	41198307	C	A	missense_variant	DDX3X	0.996203	21,1,21,4	18,6,0,0	25,3,1,0	0.531915	0	0.0344828
196	F	X	41519760	G	A	missense_variant	CASK	1	18,6,8,6	32,11,0,0	51,19,1,1	0.368421	0	0.0277778
441	F	X	41205589	C	T	missense_variant	DDX3X	1	17,6,10,6	7,6,0,0	23,13,0,1	0.410256	0	0.027027
445	F	X	48341026	G	C	missense_variant	FTSJ1	1	14,18,6,6	11,10,0,0	20,22,1,0	0.272727	0	0.0232558
398	F	X	75650535	C	T	missense_variant	MAGEE1	1	18,16,11,12	12,12,0,0	19,28,1,0	0.403509	0	0.0208333
4	F	X	100667593	G	A	missense_variant	HNRNPH2	1	18,33,19,17	9,19,0,0	16,44,1,0	0.413793	0	0.0163934
326	F	X	100667592	C	T	missense_variant	HNRNPH2	1	6,13,8,15	10,19,0,0	27,41,1,0	0.547619	0	0.0144928
129	F	X	153296806	G	A	missense_variant	MECP2	1	8,10,8,6	13,27,0,0	35,43,0,1	0.4375	0	0.0126582
515	F	X	78216366	A	G	missense_variant	P2RY10	1	15,15,15,11	20,13,0,0	30,49,1,0	0.464286	0	0.0125
300	F	X	100667592	C	T	missense_variant	HNRNPH2	1	12,14,13,10	9,22,0,0	26,57,1,0	0.469388	0	0.0119048
141	F	X	14627284	C	T	missense_variant	GLRA2	1	14,30,12,38	9,30,0,0	21,66,0,1	0.531915	0	0.0113636
306	F	X	103498963	C	T	synonymous_variant	ESX1	1	15,17,27,14	25,20,0,0	52,39,1,0	0.561644	0	0.0108696
478	F	X	84525905	C	T	stop_gained	ZNF711	1	21,10,17,11	19,15,0,0	66,28,0,1	0.474576	0	0.0105263
250	F	X	107412754	G	C	missense_variant	COL4A6	1	36,17,20,33	20,22,0,1	51,50,1,0	0.5	0.0232558	0.00980392
438	F	X	41206199	C	T	missense_variant	DDX3X	1	38,13,37,9	41,19,0,0	82,23,1,0	0.474227	0	0.00943396
325	F	X	153296471	G	A	stop_gained	MECP2	1	19,59,12,47	22,55,0,0	32,85,1,0	0.430657	0	0.00847458
319	F	X	153631609	C	G	splice_donor_variant	DNASE1L1	1	21,36,19,39	15,24,0,0	51,81,0,1	0.504348	0	0.0075188
104	F	X	41203501	C	T	stop_gained	DDX3X	1	42,11,36,12	67,21,0,0	100,34,1,0	0.475248	0	0.00740741
106	F	X	39922899	C	T	stop_gained	BCOR	1	29,29,45,34	44,50,0,0	103,75,0,1	0.576642	0	0.00558659
486	F	X	153296471	G	A	stop_gained	MECP2	1	23,67,20,56	33,47,0,0	55,129,1,0	0.457831	0	0.00540541
452	F	X	153296363	G	A	missense_variant	MECP2	1	74,29,49,33	117,90,0,0	146,82,1,0	0.443243	0	0.00436681
295	M	X	47039372	G	A	missense_variant	RBM10	0.999759	0,1,9,21	11,7,0,0	28,62,2,7	0.967742	0	0.0909091
91	M	X	137793135	G	A	missense_variant	FGF13	0.0398324	0,1,4,17	8,19,0,0	15,39,0,5	0.954545	0	0.0847458
226	M	X	48933098	AAGGAGGAG	AAGGAG	inframe_deletion	WDR45	0.998261	0,0,20,25	19,14,0,0	31,45,3,3	1	0	0.0731707
105	M	X	11780348	TAC	T	frameshift_variant	MSL3	0.846355	0,0,24,24	20,36,0,0	40,55,4,2	1	0	0.0594059
385	M	X	53321079	GACTGTTC	GACTGTTCACTGTTC	frameshift_variant	IQSEC2	0.999977	0,0,16,6	11,2,0,0	13,22,1,1	1	0	0.0540541
223	M	X	152958803	TCAACAACAAC	TCAACAAC	inframe_deletion	SLC6A8	0.873973	0,0,11,7	14,9,0,0	30,27,2,1	1	0	0.05
264	M	X	53263755	G	C	stop_gained	IQSEC2	0.89221	0,0,10,2	4,7,0,0	24,16,2,0	1	0	0.047619
15	M	X	70627887	C	T	missense_variant	TAF1	1	0,0,23,18	17,10,0,0	53,32,2,1	1	0	0.0340909
249	M	X	37967907	C	T	synonymous_variant	SYTL5	1	0,0,24,15	16,5,0,0	29,11,1,0	1	0	0.0243902
299	M	X	10176190	G	A	missense_variant	CLCN4	0.999996	0,0,16,4	18,10,0,0	23,21,0,1	1	0	0.0222222
289	M	X	53277371	G	A	missense_variant	IQSEC2	1	0,0,4,9	19,12,0,0	34,20,0,1	1	0	0.0181818
182	M	X	53563187	T	C	missense_variant	HUWE1	1	0,0,7,5	6,21,0,0	23,34,1,0	1	0	0.0172414
483	M	X	48933524	C	G	splice_donor_variant	WDR45	1	0,1,12,15	12,21,0,0	23,34,1,0	0.964286	0	0.0172414
175	M	X	44949994	C	T	missense_variant	KDM6A	1	0,0,13,6	20,4,0,0	48,19,1,0	1	0	0.0147059
52	M	X	151303732	G	T	missense_variant	MAGEA10	1	0,0,25,30	33,32,0,0	71,47,0,1	1	0	0.00840336
418	F	X	3242056	G	A	missense_variant	MXRA5	1	8,7,11,7	12,9,1,1	25,29,0,0	0.545455	0.0869565	0
47	F	X	133551319	C	T	stop_gained	PHF6	0.996982	8,22,15,25	7,17,0,1	3,20,0,0	0.571429	0.04	0
388	F	X	41200870	G	C	splice_donor_variant	DDX3X	1	5,12,5,18	6,20,0,1	12,47,0,0	0.575	0.037037	0
190	F	X	153296354	G	A	missense_variant	MECP2	1	16,7,9,10	16,16,1,0	39,24,0,0	0.452381	0.030303	0
528	F	X	41204533	C	T	missense_variant	DDX3X	1	16,19,5,7	15,20,0,1	36,55,0,0	0.255319	0.0277778	0
243	F	X	67941486	C	T	missense_variant	STARD8	1	15,9,16,20	15,26,0,1	56,58,0,0	0.6	0.0238095	0
36	F	X	99662498	G	T	stop_gained	PCDH19	0.999937	41,40,8,11	24,23,1,0	48,40,0,0	0.19	0.0208333	0
291	F	X	41206199	C	T	missense_variant	DDX3X	1	19,6,16,4	38,10,1,0	80,15,0,0	0.444444	0.0204082	0
136	F	X	41205861	G	A	missense_variant	DDX3X	1	37,34,25,35	15,37,0,1	35,57,0,0	0.458015	0.0188679	0
414	F	X	53563539	G	C	missense_variant	HUWE1	0.999619	8,8,5,4	13,39,0,1	6,20,0,0	0.36	0.0188679	0
83	F	X	41069824	T	G	missense_variant	USP9X	1	30,46,22,39	15,45,0,1	63,71,0,0	0.445255	0.0163934	0
458	F	X	12939547	C	A	synonymous_variant	TLR8	1	42,44,24,37	29,40,1,0	69,79,0,0	0.414966	0.0142857	0
110	F	X	140993850	A	T	missense_variant	MAGEC1	0.99995	108,57,30,32	88,59,1,0	201,158,0,0	0.273128	0.00675676	0
30	M	X	53576374	A	G	missense_variant	HUWE1	1	0,0,3,17	3,7,0,1	14,34,0,0	1	0.0909091	0
431	M	X	64137701	G	A	missense_variant	ZC4H2	0.999988	0,0,4,5	10,5,1,0	18,14,0,0	1	0.0625	0
474	M	X	47083087	C	T	missense_variant	CDK16	1	0,1,7,29	8,24,0,1	14,44,0,0	0.972973	0.030303	0
1	F	X	18593487	CAAAGAAA	CAAA	frameshift_variant	CDKL5	0.999999	43,5,24,4	20,5,0,0	50,5,0,0	0.368421	0	0
2	F	X	44941876	C	A	stop_gained	KDM6A	1	17,22,18,15	12,19,0,0	40,51,0,0	0.458333	0	0
5	F	X	41198321	C	T	stop_gained	DDX3X	1	34,9,35,5	25,0,0,0	57,11,0,0	0.481928	0	0
6	F	X	153197863	G	A	missense_variant	NAA10	0.990099	5,25,0,13	3,27,0,0	7,43,0,0	0.302326	0	0
8	F	X	153296882	G	A	missense_variant	MECP2	1	22,19,16,15	29,24,0,0	58,59,0,0	0.430556	0	0
10	F	X	48895721	C	T	splice_donor_variant	TFE3	0.839614	6,5,3,4	2,4,0,0	11,6,0,0	0.388889	0	0
11	F	X	114141738	C	T	synonymous_variant	HTR2C	1	16,32,20,18	22,30,0,0	53,41,0,0	0.44186	0	0
12	F	X	64140085	C	A	stop_gained	ZC4H2	1	22,10,20,12	25,10,0,0	45,22,0,0	0.5	0	0
13	F	X	110653449	T	C	missense_variant	DCX	1	13,18,14,18	25,25,0,0	46,36,0,0	0.507937	0	0
13	F	X	48419348	C	T	synonymous_variant	TBC1D25	0.999995	1,15,0,17	1,15,0,0	0,37,0,0	0.515152	0	0
14	F	X	48933605	C	T	splice_acceptor_variant	WDR45	1	3,12,1,14	3,7,0,0	8,28,0,0	0.5	0	0
18	F	X	11783694	AG	A	frameshift_variant	MSL3	1	20,26,20,23	19,25,0,0	46,67,0,0	0.483146	0	0
19	F	X	40508918	A	T	missense_variant	MED14	1	15,11,10,4	16,16,0,0	26,32,0,0	0.35	0	0
20	F	X	70612774	C	T	missense_variant	TAF1	1	53,14,32,8	35,15,0,0	83,31,0,0	0.373832	0	0
21	F	X	41196686	C	A	stop_gained	DDX3X	0.996977	2,6,3,4	6,6,0,0	9,14,0,0	0.466667	0	0
22	F	X	41205569	G	A	missense_variant	DDX3X	0.0399232	11,2,7,6	17,5,0,0	9,1,0,0	0.5	0	0
23	F	X	48895942	G	A	missense_variant	TFE3	0.00261686	2,1,3,3	1,4,0,0	2,4,0,0	0.666667	0	0
26	F	X	71684408	C	A	splice_donor_variant	HDAC8	1	31,28,29,21	32,27,0,0	63,30,0,0	0.458716	0	0
28	F	X	110653435	G	C	stop_gained	DCX	1	22,30,32,30	25,16,0,0	46,43,0,0	0.54386	0	0
28	F	X	15373382	T	G	missense_variant	VEGFD	1	14,31,22,49	15,19,0,0	27,61,0,0	0.612069	0	0
29	F	X	24750561	A	G	synonymous_variant	POLA1	1	18,37,7,8	5,25,0,0	16,63,0,0	0.214286	0	0
31	F	X	78011368	T	G	missense_variant	LPAR4	1	16,25,18,20	14,17,0,0	43,44,0,0	0.481013	0	0
32	F	X	103294941	C	T	missense_variant	H2BFM	0.999994	5,9,1,13	5,9,0,0	9,23,0,0	0.5	0	0
33	F	X	153197863	G	A	missense_variant	NAA10	1	7,9,12,2	18,12,0,0	24,15,0,0	0.466667	0	0
35	F	X	24197670	CGTTGGACATGTTGGACATGTTGGACATGTTG	CGTTGGACATGTTGGACATGTTGGACATGTTGGACATGTTG	inframe_insertion	ZFX	1	13,37,11,22	23,33,0,0	76,120,0,0	0.39759	0	0
37	F	X	153296363	G	A	missense_variant	MECP2	1	71,61,64,49	86,50,0,0	121,108,0,0	0.461224	0	0
38	F	X	48933022	C	T	splice_donor_variant	WDR45	1	12,7,14,16	14,5,0,0	45,24,0,0	0.612245	0	0
39	F	X	41204663	G	C	missense_variant	DDX3X	1	22,28,33,20	33,26,0,0	68,43,0,0	0.514563	0	0
41	F	X	120182050	AGTGTG	AGTG	frameshift_variant	GLUD2	1	29,43,33,32	34,40,0,0	72,68,0,0	0.474453	0	0
42	F	X	21609215	G	A	stop_gained	CNKSR2	1	25,55,15,45	14,36,0,0	32,92,0,0	0.428571	0	0
44	F	X	48933022	C	T	splice_donor_variant	WDR45	0.0399232	3,5,5,2	3,3,0,0	1,9,0,0	0.466667	0	0
45	F	X	49021669	C	T	stop_gained	MAGIX	0.009827	4,3,2,1	2,4,0,0	12,3,0,0	0.3	0	0
46	F	X	51638173	G	A	missense_variant	MAGED1	0.568011	11,1,9,0	15,2,0,0	14,1,0,0	0.428571	0	0
48	F	X	153197863	G	A	missense_variant	NAA10	1	5,28,6,16	4,25,0,0	8,43,0,0	0.4	0	0
49	F	X	15768282	C	T	stop_gained	CA5B	1	19,60,13,58	12,51,0,0	37,107,0,0	0.473333	0	0
51	F	X	53430825	C	A	stop_gained	SMC1A	1	8,18,8,26	10,15,0,0	26,19,0,0	0.566667	0	0
53	F	X	53432045	G	A	missense_variant	SMC1A	0.999976	14,3,10,2	11,0,0,0	16,14,0,0	0.413793	0	0
54	F	X	153642469	G	A	synonymous_variant	TAZ	0.999997	12,12,16,7	5,5,0,0	23,10,0,0	0.489362	0	0
55	F	X	92964961	G	A	synonymous_variant	FAM133A	0.0766131	3,3,7,1	3,4,0,0	7,4,0,0	0.571429	0	0
56	F	X	23018946	C	A	missense_variant	DDX53	0.759747	18,19,5,3	25,21,0,0	29,23,0,0	0.177778	0	0
58	F	X	41202566	T	C	missense_variant	DDX3X	1	15,30,14,31	13,18,0,0	29,46,0,0	0.5	0	0
60	F	X	153197551	T	G	missense_variant	NAA10	1	12,18,9,21	10,14,0,0	22,43,0,0	0.5	0	0
61	F	X	106466065	A	T	missense_variant	PIH1D3	1	16,18,7,9	6,17,0,0	60,61,0,0	0.32	0	0
62	F	X	41204533	C	T	missense_variant	DDX3X	1	33,47,28,46	30,42,0,0	29,61,0,0	0.480519	0	0
63	F	X	53459042	T	G	missense_variant	HSD17B10	1	15,11,13,9	9,8,0,0	15,33,0,0	0.458333	0	0
65	F	X	41205876	G	C	splice_donor_variant	DDX3X	1	11,13,10,15	15,17,0,0	16,22,0,0	0.510204	0	0
66	F	X	44936060	C	T	missense_variant	KDM6A	1	23,31,10,24	16,22,0,0	36,46,0,0	0.386364	0	0
67	F	X	153628236	C	T	missense_variant	RPL10	1	13,17,8,23	10,18,0,0	27,49,0,0	0.508197	0	0
68	F	X	123197045	G	A	missense_variant	STAG2	1	6,24,3,26	4,15,0,0	6,39,0,0	0.491525	0	0
71	F	X	53426595	GTT	GT	frameshift_variant	SMC1A	0.999999	6,30,2,22	4,40,0,0	8,52,0,0	0.4	0	0
72	F	X	41196686	C	G	stop_gained	DDX3X	1	21,8,22,8	14,20,0,0	39,25,0,0	0.508475	0	0
73	F	X	70779215	T	A	missense_variant	OGT	1	11,16,15,21	17,16,0,0	22,31,0,0	0.571429	0	0
74	F	X	10188877	C	T	missense_variant	CLCN4	1	17,48,11,24	17,39,0,0	38,58,0,0	0.35	0	0
75	F	X	53421748	G	A	stop_gained	SMC1A	1	8,3,10,5	20,6,0,0	30,13,0,0	0.576923	0	0
76	F	X	18606112	G	A	missense_variant	CDKL5	1	52,10,62,4	81,15,0,0	140,31,0,0	0.515625	0	0
77	F	X	41203054	C	T	synonymous_variant	DDX3X	1	16,32,19,30	21,34,0,0	45,83,0,0	0.505155	0	0
80	F	X	8507752	C	T	missense_variant	ANOS1	0.999937	22,16,7,5	22,16,0,0	37,52,0,0	0.24	0	0
81	F	X	54836213	A	G	missense_variant	MAGED2	1	8,12,16,10	11,11,0,0	27,19,0,0	0.565217	0	0
84	F	X	100667592	C	T	missense_variant	HNRNPH2	1	16,10,13,15	7,20,0,0	22,28,0,0	0.518519	0	0
86	F	X	53439121	C	T	missense_variant	SMC1A	0.999904	8,4,12,1	8,4,0,0	16,12,0,0	0.52	0	0
87	F	X	99662589	A	C	missense_variant	PCDH19	1	10,10,11,10	16,16,0,0	21,15,0,0	0.512195	0	0
87	F	X	99663233	G	T	missense_variant	PCDH19	1	17,15,13,13	24,21,0,0	39,34,0,0	0.448276	0	0
87	F	X	99663234	T	C	missense_variant	PCDH19	1	17,15,13,13	24,22,0,0	37,34,0,0	0.448276	0	0
88	F	X	71788721	T	A	stop_gained	HDAC8	0.999976	3,8,5,19	2,9,0,0	9,21,0,0	0.685714	0	0
89	F	X	153197526	A	T	missense_variant	NAA10	1	33,26,22,25	39,32,0,0	69,65,0,0	0.443396	0	0
90	F	X	152858012	G	C	stop_gained	CCNQ	0.0399232	3,2,3,3	1,2,0,0	6,4,0,0	0.545455	0	0
90	F	X	53115010	G	A	missense_variant	TSPYL2	1	13,28,10,22	24,25,0,0	22,55,0,0	0.438356	0	0
93	F	X	48368171	G	A	splice_acceptor_variant	PORCN	1	23,35,11,30	22,23,0,0	54,74,0,0	0.414141	0	0
96	F	X	63005004	A	T	missense_variant	ARHGEF9	1	18,40,23,30	18,18,0,0	42,50,0,0	0.477477	0	0
97	F	X	57021329	C	T	missense_variant	SPIN3	1	1,35,1,48	0,13,0,0	1,43,0,0	0.576471	0	0
98	F	X	18582601	C	T	missense_variant	CDKL5	1	3,29,1,22	12,58,0,0	9,80,0,0	0.418182	0	0
99	F	X	36385109	G	T	missense_variant	CFAP47	1	34,6,22,6	32,4,0,0	60,15,0,0	0.411765	0	0
100	F	X	53111842	G	A	synonymous_variant	TSPYL2	0.0204129	6,1,5,4	3,0,0,0	6,3,0,0	0.5625	0	0
102	F	X	71427544	A	G	missense_variant	ERCC6L	1	41,36,50,33	48,28,0,0	78,54,0,0	0.51875	0	0
107	F	X	103267939	A	C	synonymous_variant	H2BFWT	0.954215	11,14,13,14	6,5,0,0	10,9,0,0	0.519231	0	0
107	F	X	53561576	C	G	missense_variant	HUWE1	0.999999	11,25,12,23	4,9,0,0	10,25,0,0	0.492958	0	0
108	F	X	41206169	ATCTTCTT	ATCTT	inframe_deletion	DDX3X	1	25,42,14,26	33,40,0,0	33,82,0,0	0.373832	0	0
109	F	X	110928268	A	G	missense_variant	ALG13	1	29,18,32,24	25,9,0,0	62,26,0,0	0.543689	0	0
110	F	X	140993856	G	A	synonymous_variant	MAGEC1	0.992119	106,65,28,33	86,57,0,0	187,152,0,0	0.262931	0	0
111	F	X	41206199	C	T	missense_variant	DDX3X	1	32,16,15,6	26,8,0,0	63,30,0,0	0.304348	0	0
112	F	X	70357668	C	A	stop_gained	MED12	1	12,18,10,10	16,12,0,0	29,16,0,0	0.4	0	0
113	F	X	71715108	A	G	missense_variant	HDAC8	1	45,38,28,36	35,30,0,0	38,51,0,0	0.435374	0	0
114	F	X	62857963	C	T	missense_variant	ARHGEF9	0.976516	6,5,3,4	6,2,0,0	11,9,0,0	0.388889	0	0
115	F	X	71571623	A	T	missense_variant	HDAC8	0.999998	8,2,6,3	3,4,0,0	18,16,0,0	0.473684	0	0
116	F	X	41420871	G	A	stop_gained	CASK	1	8,12,9,25	12,13,0,0	21,28,0,0	0.62963	0	0
116	F	X	45059839	C	T	missense_variant	CXorf36	1	23,1,21,1	26,2,0,0	50,3,0,0	0.478261	0	0
118	F	X	51487590	G	A	missense_variant	GSPT2	1	69,48,66,56	67,29,0,0	165,113,0,0	0.51046	0	0
119	F	X	110439801	C	T	missense_variant	PAK3	1	28,45,29,47	24,45,0,0	53,104,0,0	0.510067	0	0
121	F	X	153296882	G	A	missense_variant	MECP2	1	2,20,5,16	2,14,0,0	6,32,0,0	0.488372	0	0
122	F	X	48934302	A	T	splice_donor_variant	WDR45	0.954215	6,8,3,9	5,15,0,0	8,11,0,0	0.461538	0	0
123	F	X	112065556	G	A	missense_variant	AMOT	1	5,9,4,7	13,11,0,0	29,21,0,0	0.44	0	0
125	F	X	41047323	C	T	stop_gained	USP9X	0.999997	6,19,13,9	2,12,0,0	14,19,0,0	0.468085	0	0
126	F	X	73960513	C	T	stop_gained	NEXMIF	1	8,3,11,4	7,7,0,0	25,18,0,0	0.576923	0	0
127	F	X	71684432	A	T	stop_gained	HDAC8	1	36,9,9,15	25,19,0,0	64,34,0,0	0.347826	0	0
131	F	X	41000634	C	T	stop_gained	USP9X	1	13,7,20,10	12,17,0,0	34,26,0,0	0.6	0	0
132	F	X	153579375	A	G	missense_variant	FLNA	1	26,11,18,17	28,20,0,0	38,46,0,0	0.486111	0	0
134	F	X	48117185	TTGATGAT	TTGAT	inframe_deletion	SSX1	1	72,17,48,8	76,14,0,0	101,25,0,0	0.386207	0	0
135	F	X	62917056	A	T	stop_gained	ARHGEF9	0.999994	8,2,12,2	4,2,0,0	22,10,0,0	0.583333	0	0
137	F	X	39930311	C	T	stop_gained	BCOR	0.999988	3,7,4,10	8,19,0,0	6,25,0,0	0.583333	0	0
138	F	X	48762353	T	C	missense_variant	SLC35A2	0.115935	3,5,1,3	2,2,0,0	5,7,0,0	0.333333	0	0
139	F	X	110928268	A	G	missense_variant	ALG13	1	164209159195	123,108,0,0	215,256,0,0	0.486933	0	0
142	F	X	41000677	GAA	GA	frameshift_variant	USP9X	0.980144	3,7,5,11	4,22,0,0	13,26,0,0	0.615385	0	0
144	F	X	153296516	G	A	stop_gained	MECP2	1	31,14,28,12	30,11,0,0	77,30,0,0	0.470588	0	0
145	F	X	53642747	A	C	missense_variant	HUWE1	0.494059	2,5,2,1	8,4,0,0	10,10,0,0	0.3	0	0
146	F	X	19375793	GACTTAC	GACTTACTTAC	frameshift_variant	PDHA1	1	15,34,16,33	25,55,0,0	55,85,0,0	0.5	0	0
147	F	X	151358407	G	C	missense_variant	GABRA3	1	2,12,1,8	8,9,0,0	14,47,0,0	0.391304	0	0
149	F	X	76940061	C	A	missense_variant	ATRX	1	32,94,25,82	56,96,0,0	65,181,0,0	0.459227	0	0
150	F	X	70349949	T	A	missense_variant	MED12	0.724041	0,6,5,3	4,7,0,0	7,9,0,0	0.571429	0	0
151	F	X	41012242	TAATCAATCAA	TAATCAA	frameshift_variant	USP9X	1	22,22,36,25	44,20,0,0	73,36,0,0	0.580952	0	0
152	F	X	153197865	C	T	missense_variant	NAA10	1	3,25,5,24	7,23,0,0	6,36,0,0	0.508772	0	0
153	F	X	31514976	C	T	missense_variant	DMD	0.999997	13,19,9,16	9,16,0,0	8,25,0,0	0.438596	0	0
154	F	X	41205816	C	T	missense_variant	DDX3X	1	12,8,13,10	14,13,0,0	30,30,0,0	0.534884	0	0
156	F	X	41203558	C	T	stop_gained	DDX3X	1	10,17,12,17	15,17,0,0	36,54,0,0	0.517857	0	0
157	F	X	64139057	C	T	stop_gained	ZC4H2	1	9,18,7,14	17,21,0,0	46,55,0,0	0.4375	0	0
158	F	X	71715077	A	G	missense_variant	HDAC8	0.999952	10,17,2,8	15,15,0,0	11,18,0,0	0.27027	0	0
159	F	X	153200953	C	T	missense_variant	RENBP	1	23,10,6,6	12,12,0,0	23,26,0,0	0.266667	0	0
160	F	X	11790367	ATTGTTTG	ATTG	frameshift_variant	MSL3	1	9,53,3,56	9,57,0,0	20,105,0,0	0.487603	0	0
161	F	X	41519691	C	T	splice_donor_variant	CASK	0.993995	9,1,12,0	6,0,0,0	20,2,0,0	0.545455	0	0
162	F	X	53600755	A	C	missense_variant	HUWE1	1	25,16,19,8	27,10,0,0	38,31,0,0	0.397059	0	0
165	F	X	15782766	C	T	missense_variant	CA5B	0.0306534	17,7,8,9	24,18,0,0	64,44,0,0	0.414634	0	0
166	F	X	53439101	CAGAGA	CAGA	frameshift_variant	SMC1A	0.993275	11,39,2,8	6,10,0,0	16,25,0,0	0.166667	0	0
167	F	X	79948515	ACC	AC	frameshift_variant	BRWD3	1	35,65,23,42	33,48,0,0	66,141,0,0	0.393939	0	0
168	F	X	138698469	A	G	missense_variant	MCF2	0.999684	7,1,4,1	14,3,0,0	43,6,0,0	0.384615	0	0
169	F	X	123164908	ACC	ACCC	frameshift_variant	STAG2	1	13,34,16,25	21,35,0,0	23,44,0,0	0.465909	0	0
170	F	X	130678725	G	A	synonymous_variant	OR13H1	1	21,32,33,47	26,41,0,0	53,76,0,0	0.601504	0	0
170	F	X	41205842	C	T	missense_variant	DDX3X	1	17,14,7,18	11,16,0,0	27,35,0,0	0.446429	0	0
171	F	X	131525022	C	T	synonymous_variant	MBNL3	0.999992	6,14,7,2	12,16,0,0	34,33,0,0	0.310345	0	0
172	F	X	70346296	T	C	missense_variant	MED12	1	26,13,8,6	24,15,0,0	55,31,0,0	0.264151	0	0
174	F	X	70349262	A	G	missense_variant	MED12	0.988091	3,4,2,7	2,7,0,0	3,18,0,0	0.5625	0	0
177	F	X	41205794	CAT	C	frameshift_variant	DDX3X	1	31,26,31,21	32,33,0,0	55,62,0,0	0.477064	0	0
178	F	X	2871194	A	T	synonymous_variant	ARSE	0.136807	36,25,9,2	27,9,0,0	64,22,0,0	0.152778	0	0
179	F	X	140984602	CTT	CT	frameshift_variant	MAGEC3	0.999929	2,13,0,14	1,16,0,0	58,19,0,0	0.482759	0	0
180	F	X	73811418	T	C	missense_variant	RLIM	0.999997	7,14,3,14	0,20,0,0	6,27,0,0	0.447368	0	0
181	F	X	5821143	A	G	missense_variant	NLGN4X	1	10,14,17,12	16,10,0,0	23,15,0,0	0.54717	0	0
184	F	X	71684483	A	C	missense_variant	HDAC8	1	37,45,11,13	19,17,0,0	50,50,0,0	0.226415	0	0
185	F	X	3573262	T	G	missense_variant	PRKX	1	34,31,25,28	24,24,0,0	65,66,0,0	0.449153	0	0
187	F	X	16870916	T	C	missense_variant	RBBP7	1	48,36,45,34	47,18,0,0	87,69,0,0	0.484663	0	0
188	F	X	49137892	C	T	missense_variant	PPP1R3F	0.993996	2,4,7,4	10,2,0,0	15,7,0,0	0.647059	0	0
189	F	X	41204463	GTTGGATAT	GT	frameshift_variant	DDX3X	0.999999	33,31,21,9	31,24,0,0	96,54,0,0	0.319149	0	0
191	F	X	123205174	G	A	splice_donor_variant	STAG2	0.999998	1,19,6,24	1,21,0,0	1,33,0,0	0.6	0	0
193	F	X	34962108	C	T	missense_variant	FAM47B	1	26,61,26,57	25,41,0,0	47,107,0,0	0.488235	0	0
194	F	X	48463235	G	A	splice_acceptor_variant	WDR13	0.95421	6,3,8,1	8,1,0,0	17,2,0,0	0.5	0	0
195	F	X	107372043	C	T	missense_variant	ATG4A	0.568031	2,4,2,6	1,10,0,0	5,10,0,0	0.571429	0	0
195	F	X	151821304	G	A	missense_variant	GABRQ	1	21,21,15,14	13,17,0,0	33,35,0,0	0.408451	0	0
197	F	X	41412979	G	A	stop_gained	CASK	0.954215	10,6,18,2	18,15,0,0	16,3,0,0	0.555556	0	0
198	F	X	48934430	T	C	missense_variant	WDR45	1	14,12,8,10	10,18,0,0	37,38,0,0	0.409091	0	0
199	F	X	19369501	C	T	stop_gained	PDHA1	1	25,37,12,29	40,52,0,0	75,83,0,0	0.398058	0	0
200	F	X	41205834	A	C	missense_variant	DDX3X	1	15,16,12,10	5,1,0,0	25,24,0,0	0.415094	0	0
201	F	X	48117181	G	C	missense_variant	SSX1	1	39,8,41,4	62,12,0,0	110,33,0,0	0.48913	0	0
202	F	X	41196659	A	C	splice_acceptor_variant	DDX3X	1	26,10,29,7	30,5,0,0	59,18,0,0	0.5	0	0
203	F	X	13778418	TG	T	frameshift_variant	OFD1	1	9,11,2,8	5,13,0,0	28,39,0,0	0.333333	0	0
204	F	X	41204701	AGG	AGGG	frameshift_variant	DDX3X	0.546036	16,15,8,4	4,6,0,0	16,24,0,0	0.27907	0	0
205	F	X	21550155	C	T	stop_gained	CNKSR2	1	16,30,14,35	14,34,0,0	32,71,0,0	0.515789	0	0
206	F	X	41055576	ACTTTTCTT	ACTT	frameshift_variant	USP9X	0.984301	13,4,13,11	11,5,0,0	26,15,0,0	0.585366	0	0
207	F	X	41205794	CAT	C	frameshift_variant	DDX3X	0.539839	9,6,15,11	10,11,0,0	19,15,0,0	0.634146	0	0
208	F	X	53440286	G	A	stop_gained	SMC1A	1	19,10,19,17	26,27,0,0	61,57,0,0	0.553846	0	0
209	F	X	53432843	G	A	stop_gained	SMC1A	1	15,11,9,9	12,13,0,0	31,22,0,0	0.409091	0	0
211	F	X	53409567	G	A	stop_gained	SMC1A	0.839616	1,4,2,5	0,15,0,0	4,13,0,0	0.583333	0	0
212	F	X	41196659	A	G	splice_acceptor_variant	DDX3X	0.99924	12,16,7,14	8,8,0,0	13,12,0,0	0.428571	0	0
214	F	X	76918952	C	G	missense_variant	ATRX	1	8,9,12,11	17,15,0,0	28,31,0,0	0.575	0	0
216	F	X	153296882	G	A	missense_variant	MECP2	0.999988	2,14,4,17	2,12,0,0	6,25,0,0	0.567568	0	0
217	F	X	53563561	T	A	missense_variant	HUWE1	0.999976	5,7,4,8	6,9,0,0	14,16,0,0	0.5	0	0
218	F	X	153184359	T	C	missense_variant	ARHGAP4	1	12,2,11,5	15,11,0,0	23,23,0,0	0.533333	0	0
219	F	X	41029315	TTG	TTGTG	frameshift_variant	USP9X	1	16,27,26,26	26,14,0,0	58,35,0,0	0.547368	0	0
221	F	X	53277371	G	A	missense_variant	IQSEC2	1	13,14,10,14	18,19,0,0	28,28,0,0	0.470588	0	0
222	F	X	41412993	G	A	missense_variant	CASK	1	27,13,18,21	27,16,0,0	53,42,0,0	0.493671	0	0
224	F	X	53271070	G	A	stop_gained	IQSEC2	1	2,37,3,16	6,16,0,0	5,36,0,0	0.327586	0	0
225	F	X	53578039	G	A	missense_variant	HUWE1	1	11,13,13,22	20,24,0,0	27,27,0,0	0.59322	0	0
227	F	X	41201864	ATGATTG	ATG	frameshift_variant	DDX3X	0.0769993	2,4,3,5	7,19,0,0	10,22,0,0	0.571429	0	0
229	F	X	105011565	ACCC	ACC	frameshift_variant	IL1RAPL2	1	34,18,26,11	28,24,0,0	94,53,0,0	0.41573	0	0
230	F	X	19368203	GTTT	GTT	frameshift_variant	PDHA1	0.876559	13,46,3,13	11,40,0,0	10,62,0,0	0.213333	0	0
232	F	X	76854914	T	G	synonymous_variant	ATRX	1	47,4,48,10	36,3,0,0	93,24,0,0	0.53211	0	0
233	F	X	9707537	T	C	missense_variant	GPR143	0.568031	22,4,18,1	11,5,0,0	13,2,0,0	0.422222	0	0
235	F	X	105280625	G	T	missense_variant	SERPINA7	1	13,18,17,24	11,18,0,0	40,59,0,0	0.569444	0	0
235	F	X	53409260	GCCATCCA	GCCA	frameshift_variant	SMC1A	0.840348	19,4,16,3	10,2,0,0	30,10,0,0	0.452381	0	0
236	F	X	41205589	C	T	missense_variant	DDX3X	0.999998	6,5,7,4	5,2,0,0	21,13,0,0	0.5	0	0
238	F	X	41393958	C	T	splice_donor_variant	CASK	0.999996	17,1,9,1	12,9,0,0	40,11,0,0	0.357143	0	0
240	F	X	41203648	T	C	missense_variant	DDX3X	0.142033	0,29,0,22	0,17,0,0	0,12,0,0	0.431373	0	0
241	F	X	11783613	GCC	GCCC	frameshift_variant	MSL3	0.996701	18,2,18,6	16,2,0,0	39,4,0,0	0.545455	0	0
246	F	X	153296756	T	A	stop_gained	MECP2	1	8,23,8,24	11,30,0,0	25,67,0,0	0.507937	0	0
247	F	X	41203648	T	C	missense_variant	DDX3X	0.797304	0,8,0,6	1,13,0,0	0,18,0,0	0.428571	0	0
248	F	X	48933232	G	A	stop_gained	WDR45	1	7,7,5,4	6,14,0,0	20,25,0,0	0.391304	0	0
252	F	X	53588821	T	C	missense_variant	HUWE1	0.999988	9,9,11,12	9,11,0,0	13,18,0,0	0.560976	0	0
256	F	X	73963740	G	A	stop_gained	NEXMIF	1	9,29,16,21	9,8,0,0	24,49,0,0	0.493333	0	0
257	F	X	65392272	C	T	synonymous_variant	HEPH	1	15,9,7,12	11,13,0,0	29,17,0,0	0.44186	0	0
259	F	X	44949107	G	A	missense_variant	KDM6A	1	17,30,5,19	9,18,0,0	20,40,0,0	0.338028	0	0
260	F	X	3229004	C	T	missense_variant	MXRA5	1	9,16,8,8	15,24,0,0	28,51,0,0	0.390244	0	0
260	F	X	84522413	C	T	missense_variant	ZNF711	1	6,20,8,14	13,24,0,0	35,50,0,0	0.458333	0	0
262	F	X	64141855	G	A	stop_gained	ZC4H2	0.999997	6,10,7,12	8,16,0,0	18,15,0,0	0.542857	0	0
263	F	X	64751291	G	A	missense_variant	LAS1L	1	26,14,18,12	15,13,0,0	40,37,0,0	0.428571	0	0
265	F	X	41205589	C	G	missense_variant	DDX3X	1	16,9,9,8	7,10,0,0	21,15,0,0	0.404762	0	0
266	F	X	71788603	C	T	splice_donor_variant	HDAC8	1	10,7,9,6	17,13,0,0	41,24,0,0	0.46875	0	0
267	F	X	152937053	G	A	synonymous_variant	PNCK	1	13,18,12,23	23,14,0,0	41,42,0,0	0.530303	0	0
268	F	X	153296516	G	A	stop_gained	MECP2	1	13,18,17,15	37,60,0,0	55,78,0,0	0.507937	0	0
269	F	X	53277371	G	A	missense_variant	IQSEC2	1	14,17,4,10	13,9,0,0	21,25,0,0	0.311111	0	0
270	F	X	48933232	G	A	stop_gained	WDR45	0.136806	2,4,1,2	7,6,0,0	13,17,0,0	0.333333	0	0
271	F	X	123197770	T	A	missense_variant	STAG2	1	9,25,8,19	12,19,0,0	35,45,0,0	0.442623	0	0
271	F	X	123197788	GCACTCTGTAA	G	frameshift_variant	STAG2	1	4,22,6,18	7,18,0,0	28,48,0,0	0.48	0	0
273	F	X	107869535	C	A	missense_variant	COL4A5	0.0124323	10,4,2,3	8,1,0,0	17,6,0,0	0.263158	0	0
274	F	X	29973431	C	T	missense_variant	IL1RAPL1	1	18,25,21,18	26,33,0,0	33,52,0,0	0.47561	0	0
276	F	X	152959802	G	A	missense_variant	SLC6A8	1	18,27,10,11	13,17,0,0	31,57,0,0	0.318182	0	0
277	F	X	41193551	G	T	splice_donor_variant	DDX3X	0.999904	3,14,1,13	0,7,0,0	6,22,0,0	0.451613	0	0
278	F	X	153296777	G	A	stop_gained	MECP2	1	11,26,12,27	10,16,0,0	19,55,0,0	0.513158	0	0
279	F	X	38260625	G	C	missense_variant	OTC	1	25,37,25,31	18,15,0,0	40,51,0,0	0.474576	0	0
280	F	X	41420871	G	A	stop_gained	CASK	0.999619	7,5,4,4	6,7,0,0	7,19,0,0	0.4	0	0
281	F	X	41205863	G	A	missense_variant	DDX3X	0.999619	16,17,10,10	7,11,0,0	16,10,0,0	0.377358	0	0
282	F	X	101910646	C	G	missense_variant	GPRASP1	0.999999	9,10,7,4	11,12,0,0	15,20,0,0	0.366667	0	0
283	F	X	153688677	C	T	stop_gained	PLXNA3	0.912628	3,6,4,6	7,3,0,0	11,7,0,0	0.526316	0	0
284	F	X	153296471	G	A	stop_gained	MECP2	1	10,29,11,37	19,51,0,0	63,166,0,0	0.551724	0	0
285	F	X	153296777	G	A	stop_gained	MECP2	1	17,35,11,21	7,29,0,0	38,52,0,0	0.380952	0	0
286	F	X	110928268	A	G	missense_variant	ALG13	1	21,15,24,17	15,7,0,0	51,33,0,0	0.532468	0	0
287	F	X	109561259	G	C	missense_variant	AMMECR1	0.56803	1,9,2,4	1,8,0,0	1,14,0,0	0.375	0	0
288	F	X	101910979	A	C	missense_variant	GPRASP1	0.999952	12,7,10,6	13,13,0,0	18,11,0,0	0.457143	0	0
293	F	X	73963668	CT	CTT	frameshift_variant	NEXMIF	1	24,35,27,27	8,14,0,0	50,58,0,0	0.477876	0	0
296	F	X	19371211	G	A	missense_variant	PDHA1	0.999952	7,1,8,2	10,2,0,0	21,8,0,0	0.555556	0	0
297	F	X	153627850	C	G	missense_variant	RPL10	1	9,30,5,35	7,29,0,0	35,73,0,0	0.506329	0	0
298	F	X	123514945	A	G	missense_variant	TENM1	1	10,16,7,11	8,23,0,0	25,43,0,0	0.409091	0	0
301	F	X	84347502	G	C	missense_variant	SATL1	0.99924	6,6,1,8	4,10,0,0	9,16,0,0	0.428571	0	0
302	F	X	153296824	G	C	missense_variant	MECP2	1	3,20,3,10	8,11,0,0	11,29,0,0	0.361111	0	0
303	F	X	18602436	G	A	missense_variant	CDKL5	1	22,6,15,4	14,4,0,0	46,16,0,0	0.404255	0	0
304	F	X	119693941	T	C	missense_variant	CUL4B	1	25,6,28,10	26,13,0,0	66,17,0,0	0.550725	0	0
307	F	X	53563449	T	C	missense_variant	HUWE1	1	6,21,9,24	6,19,0,0	10,38,0,0	0.55	0	0
308	F	X	71684459	C	T	missense_variant	HDAC8	1	15,23,19,23	16,26,0,0	53,46,0,0	0.525	0	0
309	F	X	135314300	A	G	synonymous_variant	MAP7D3	1	15,13,26,15	6,14,0,0	31,30,0,0	0.594203	0	0
310	F	X	31165577	G	GTC	frameshift_variant	DMD	1	13,10,14,7	22,13,0,0	45,33,0,0	0.477273	0	0
311	F	X	18606112	G	A	missense_variant	CDKL5	1	12,0,11,5	8,1,0,0	42,9,0,0	0.571429	0	0
312	F	X	41205496	A	C	missense_variant	DDX3X	0.0204051	5,0,3,1	7,0,0,0	9,0,0,0	0.444444	0	0
314	F	X	71715024	C	T	missense_variant	HDAC8	1	22,2,15,2	15,6,0,0	46,8,0,0	0.414634	0	0
315	F	X	49108166	G	A	missense_variant	FOXP3	0.909091	49,44,9,11	32,31,0,0	62,69,0,0	0.176991	0	0
316	F	X	41712463	A	G	missense_variant	CASK	0.999994	1,7,3,8	3,9,0,0	8,24,0,0	0.578947	0	0
317	F	X	64141778	G	C	stop_gained	ZC4H2	1	11,10,9,3	12,10,0,0	44,13,0,0	0.363636	0	0
318	F	X	123224610	T	A	missense_variant	STAG2	1	3,21,9,15	13,19,0,0	15,26,0,0	0.5	0	0
320	F	X	39933009	CTTGTTT	CTT	frameshift_variant	BCOR	0.999905	5,17,5,19	8,24,0,0	11,38,0,0	0.521739	0	0
321	F	X	41203008	C	T	missense_variant	DDX3X	1	37,18,31,17	30,27,0,0	75,58,0,0	0.466019	0	0
322	F	X	153032954	G	A	synonymous_variant	PLXNB3	1	7,10,7,9	12,18,0,0	31,24,0,0	0.484848	0	0
323	F	X	104465008	A	G	missense_variant	TEX13A	1	1,13,3,12	6,14,0,0	13,30,0,0	0.517241	0	0
324	F	X	48935408	T	C	splice_acceptor_variant	WDR45	1	9,12,12,10	11,19,0,0	13,24,0,0	0.511628	0	0
327	F	X	53617414	T	C	missense_variant	HUWE1	1	1,13,7,5	6,12,0,0	12,36,0,0	0.461538	0	0
329	F	X	70343541	A	C	missense_variant	MED12	1	6,15,18,3	19,12,0,0	25,12,0,0	0.5	0	0
331	F	X	41089766	CAAGATGCTCCAGATGAA	CAA	inframe_deletion	USP9X	1	55,8,16,7	37,15,0,0	69,15,0,0	0.267442	0	0
333	F	X	18613466	A	G	splice_acceptor_variant	CDKL5	1	18,23,19,20	30,44,0,0	46,55,0,0	0.4875	0	0
334	F	X	108719146	C	A	missense_variant	GUCY2F	0.999994	0,16,0,22	0,17,0,0	4,28,0,0	0.578947	0	0
335	F	X	70348547	A	T	missense_variant	MED12	1	8,7,8,4	13,5,0,0	26,26,0,0	0.444444	0	0
337	F	X	18600009	A	G	splice_acceptor_variant	CDKL5	0.993996	6,3,10,1	7,4,0,0	14,8,0,0	0.55	0	0
339	F	X	53440208	T	C	missense_variant	SMC1A	1	25,6,21,10	24,6,0,0	49,18,0,0	0.5	0	0
340	F	X	41193551	G	A	splice_donor_variant	DDX3X	0.993996	4,16,4,10	2,16,0,0	5,17,0,0	0.411765	0	0
343	F	X	41206124	C	T	missense_variant	DDX3X	0.999963	12,0,12,0	14,0,0,0	31,0,0,0	0.5	0	0
344	F	X	64743992	C	T	missense_variant	LAS1L	0.999921	18,15,7,3	11,11,0,0	42,19,0,0	0.232558	0	0
345	F	X	64139032	TGGGGGG	TGGGGGGG	frameshift_variant	ZC4H2	0.732791	7,9,11,11	13,13,0,0	31,28,0,0	0.578947	0	0
347	F	X	41205629	G	A	missense_variant	DDX3X	0.998485	11,5,7,3	9,11,0,0	19,5,0,0	0.384615	0	0
348	F	X	70779223	C	T	missense_variant	OGT	1	12,21,7,22	16,24,0,0	32,43,0,0	0.467742	0	0
349	F	X	18665420	A	C	missense_variant	RS1	0.948504	2,3,2,2	1,3,0,0	7,12,0,0	0.444444	0	0
351	F	X	50054487	A	G	synonymous_variant	CCNB3	1	2,14,5,18	9,29,0,0	19,75,0,0	0.589744	0	0
354	F	X	53227766	T	C	missense_variant	KDM5C	1	10,9,15,5	20,5,0,0	48,10,0,0	0.512821	0	0
355	F	X	53265543	C	G	missense_variant	IQSEC2	1	18,5,21,4	20,6,0,0	55,14,0,0	0.520833	0	0
358	F	X	48317972	G	A	missense_variant	SLC38A5	1	9,4,7,4	19,4,0,0	32,18,0,0	0.458333	0	0
359	F	X	153132959	G	A	synonymous_variant	L1CAM	1	7,5,8,8	12,9,0,0	23,24,0,0	0.571429	0	0
360	F	X	36091472	C	T	missense_variant	CFAP47	1	13,36,10,29	18,36,0,0	24,77,0,0	0.443182	0	0
362	F	X	49110464	G	C	missense_variant	FOXP3	1	8,19,7,12	16,19,0,0	20,24,0,0	0.413043	0	0
363	F	X	153070066	T	G	missense_variant	PDZD4	1	10,9,9,5	17,11,0,0	35,23,0,0	0.424242	0	0
364	F	X	8536292	C	T	synonymous_variant	ANOS1	1	16,5,19,6	7,3,0,0	46,12,0,0	0.543478	0	0
366	F	X	41203501	C	T	stop_gained	DDX3X	1	33,20,29,16	25,20,0,0	62,37,0,0	0.459184	0	0
368	F	X	53441767	G	C	stop_gained	SMC1A	1	20,9,19,15	11,18,0,0	29,30,0,0	0.539683	0	0
369	F	X	153197863	G	A	missense_variant	NAA10	1	30,14,9,10	20,12,0,0	25,22,0,0	0.301587	0	0
370	F	X	44879931	G	A	missense_variant	KDM6A	1	4,11,5,9	5,8,0,0	20,22,0,0	0.482759	0	0
371	F	X	133527587	T	A	stop_gained	PHF6	0.999904	9,15,16,10	17,7,0,0	14,14,0,0	0.52	0	0
372	F	X	76890089	A	G	missense_variant	ATRX	1	22,4,20,3	33,4,0,0	53,15,0,0	0.469388	0	0
373	F	X	153714204	G	A	missense_variant	UBL4A	0.333861	19,26,3,8	14,14,0,0	23,42,0,0	0.196429	0	0
375	F	X	47919848	C	A	missense_variant	ZNF630	1	25,9,13,10	18,9,0,0	48,21,0,0	0.403509	0	0
376	F	X	153072234	G	A	missense_variant	PDZD4	1	18,11,17,9	20,15,0,0	38,20,0,0	0.472727	0	0
377	F	X	78427304	G	T	missense_variant	GPR174	0.999987	50,45,10,16	46,38,0,0	84,76,0,0	0.214876	0	0
378	F	X	48933232	G	A	stop_gained	WDR45	0.999976	5,4,7,9	7,8,0,0	19,11,0,0	0.64	0	0
379	F	X	39914682	C	G	synonymous_variant	BCOR	1	30,11,23,15	72,36,0,0	68,43,0,0	0.481013	0	0
380	F	X	153297673	T	A	missense_variant	MECP2	0.999619	9,1,8,4	12,2,0,0	18,8,0,0	0.545455	0	0
381	F	X	140984641	C	T	missense_variant	MAGEC3	1	26,21,16,10	28,12,0,0	61,52,0,0	0.356164	0	0
384	F	X	53280167	G	A	stop_gained	IQSEC2	1	24,26,31,24	30,19,0,0	44,39,0,0	0.52381	0	0
387	F	X	134680684	C	T	missense_variant	INTS6L	1	12,24,17,22	22,29,0,0	55,70,0,0	0.52	0	0
389	F	X	41402061	T	C	splice_acceptor_variant	CASK	1	3,17,2,18	3,29,0,0	5,36,0,0	0.5	0	0
390	F	X	100667592	C	T	missense_variant	HNRNPH2	1	10,17,19,26	15,38,0,0	38,58,0,0	0.625	0	0
392	F	X	129837147	ATT	ATTT	frameshift_variant	ENOX2	1	29,35,31,16	27,15,0,0	47,31,0,0	0.423423	0	0
393	F	X	73964056	C	T	stop_gained	NEXMIF	1	6,15,8,11	18,17,0,0	13,25,0,0	0.475	0	0
394	F	X	48933333	GACACACA	GACACA	frameshift_variant	WDR45	1	15,8,15,7	31,21,0,0	71,30,0,0	0.488889	0	0
395	F	X	41205589	C	T	missense_variant	DDX3X	0.999976	22,5,13,4	7,6,0,0	20,10,0,0	0.386364	0	0
396	F	X	70612768	C	T	missense_variant	TAF1	1	34,8,34,7	22,6,0,0	50,17,0,0	0.493976	0	0
399	F	X	100228716	G	A	missense_variant	ARL13A	0.999998	13,12,14,8	19,4,0,0	28,6,0,0	0.468085	0	0
400	F	X	53271070	G	A	stop_gained	IQSEC2	1	1,13,1,11	5,22,0,0	9,44,0,0	0.461538	0	0
401	F	X	100667611	G	C	missense_variant	HNRNPH2	1	13,18,8,15	9,21,0,0	22,45,0,0	0.425926	0	0
401	F	X	112053194	T	C	missense_variant	AMOT	1	4,11,3,7	6,13,0,0	11,25,0,0	0.4	0	0
403	F	X	49021687	C	T	stop_gained	MAGIX	0.998485	0,10,1,12	1,8,0,0	1,23,0,0	0.565217	0	0
404	F	X	13607782	G	C	missense_variant	EGFL6	0.999988	6,7,6,7	8,17,0,0	9,22,0,0	0.5	0	0
405	F	X	53280198	CAGGTAG	CAG	frameshift_variant	IQSEC2	1	15,19,17,14	22,35,0,0	37,51,0,0	0.476923	0	0
406	F	X	64137751	A	G	missense_variant	ZC4H2	0.999999	2,1,5,2	8,4,0,0	18,17,0,0	0.7	0	0
408	F	X	9900862	AACTGAC	AAC	frameshift_variant	SHROOM2	0.999998	11,15,8,17	11,17,0,0	24,35,0,0	0.490196	0	0
409	F	X	153296777	G	A	stop_gained	MECP2	1	12,17,7,15	12,23,0,0	18,43,0,0	0.431373	0	0
410	F	X	118533582	C	A	missense_variant	SLC25A43	0.397238	3,2,3,3	2,4,0,0	4,10,0,0	0.545455	0	0
411	F	X	41203501	C	T	stop_gained	DDX3X	1	38,20,23,15	19,20,0,0	53,40,0,0	0.395833	0	0
412	F	X	125299771	G	A	missense_variant	DCAF12L2	1	15,25,14,31	12,20,0,0	27,45,0,0	0.529412	0	0
413	F	X	68058679	G	A	synonymous_variant	EFNB1	1	3,22,8,18	11,23,0,0	10,44,0,0	0.509804	0	0
415	F	X	41204702	G	C	missense_variant	DDX3X	0.999997	10,10,6,6	8,6,0,0	10,23,0,0	0.375	0	0
416	F	X	101409090	C	T	missense_variant	BEX5	1	8,17,20,26	17,24,0,0	31,45,0,0	0.647887	0	0
417	F	X	153296399	G	A	stop_gained	MECP2	1	21,26,30,30	35,32,0,0	85,88,0,0	0.560748	0	0
419	F	X	19371236	C	T	missense_variant	PDHA1	1	20,8,23,5	16,15,0,0	52,25,0,0	0.5	0	0
420	F	X	105168776	A	G	missense_variant	NRK	1	18,8,16,7	14,8,0,0	55,39,0,0	0.469388	0	0
420	F	X	41205560	G	T	missense_variant	DDX3X	0.0245034	12,7,3,2	14,7,0,0	47,9,0,0	0.208333	0	0
421	F	X	135047292	C	A	missense_variant	MMGT1	1	23,37,19,31	6,39,0,0	33,78,0,0	0.454545	0	0
422	F	X	100667592	C	T	missense_variant	HNRNPH2	1	13,24,22,20	11,15,0,0	30,42,0,0	0.531646	0	0
423	F	X	153296882	G	A	missense_variant	MECP2	0.988091	3,9,1,15	3,14,0,0	3,18,0,0	0.571429	0	0
424	F	X	63412110	G	A	stop_gained	AMER1	1	19,22,16,21	16,22,0,0	45,39,0,0	0.474359	0	0
425	F	X	37431351	C	T	synonymous_variant	LANCL3	0.0204156	2,8,1,7	2,8,0,0	3,6,0,0	0.444444	0	0
426	F	X	16857951	A	G	missense_variant	TXLNG	0.999988	22,2,16,1	19,2,0,0	30,1,0,0	0.414634	0	0
428	F	X	153296378	G	A	missense_variant	MECP2	1	61,71,67,56	52,39,0,0	106,85,0,0	0.482353	0	0
429	F	X	41201775	C	CT	frameshift_variant	DDX3X	1	29,31,30,21	20,14,0,0	67,64,0,0	0.459459	0	0
432	F	X	153296882	G	A	missense_variant	MECP2	0.999617	1,11,1,9	1,12,0,0	4,22,0,0	0.454545	0	0
433	F	X	48933076	CTT	CTTT	frameshift_variant	WDR45	1	14,12,10,13	15,8,0,0	31,31,0,0	0.469388	0	0
434	F	X	32583957	G	C	synonymous_variant	DMD	1	2,28,3,37	6,41,0,0	15,69,0,0	0.571429	0	0
435	F	X	43702915	C	A	splice_donor_variant	MAOB	1	22,22,16,11	19,18,0,0	43,44,0,0	0.380282	0	0
437	F	X	70352373	G	A	missense_variant	MED12	0.999994	4,6,8,9	5,12,0,0	16,16,0,0	0.62963	0	0
439	F	X	151424344	A	G	missense_variant	GABRA3	1	39,12,36,7	36,12,0,0	43,11,0,0	0.457447	0	0
440	F	X	70338696	A	G	missense_variant	MED12	1	18,16,13,15	18,21,0,0	43,39,0,0	0.451613	0	0
442	F	X	153736896	G	T	missense_variant	FAM3A	1	17,20,18,21	16,19,0,0	26,45,0,0	0.513158	0	0
443	F	X	131206904	G	A	splice_donor_variant	.	1	12,2,16,8	19,8,0,0	28,8,0,0	0.631579	0	0
444	F	X	100668025	CTAATATGCAACACAGATA	CTA	frameshift_variant	HNRNPH2	1	39,22,10,5	51,15,0,0	113,57,0,0	0.197368	0	0
445	F	X	48341027	C	T	missense_variant	FTSJ1	1	15,17,6,6	11,12,0,0	20,22,0,0	0.272727	0	0
446	F	X	77912913	C	T	synonymous_variant	RTL3	1	9,26,8,18	11,25,0,0	17,29,0,0	0.42623	0	0
448	F	X	47002089	G	A	stop_gained	NDUFB11	1	8,17,10,27	9,15,0,0	10,43,0,0	0.596774	0	0
449	F	X	48762329	GCC	GC	frameshift_variant	SLC35A2	1	12,12,18,15	18,13,0,0	33,32,0,0	0.578947	0	0
454	F	X	47102047	G	A	missense_variant	USP11	0.976517	3,12,5,10	3,4,0,0	7,13,0,0	0.5	0	0
455	F	X	10188877	C	T	missense_variant	CLCN4	1	1,20,5,16	0,18,0,0	5,62,0,0	0.5	0	0
457	F	X	133609373	T	C	synonymous_variant	HPRT1	1	6,19,7,11	3,7,0,0	5,38,0,0	0.418605	0	0
460	F	X	70511818	G	A	missense_variant	NONO	1	24,30,32,36	22,42,0,0	37,80,0,0	0.557377	0	0
462	F	X	55758012	G	A	missense_variant	RRAGB	0.00498687	6,21,1,4	3,18,0,0	7,20,0,0	0.15625	0	0
463	F	X	117540871	G	A	missense_variant	WDR44	1	24,8,19,2	17,8,0,0	49,13,0,0	0.396226	0	0
464	F	X	108921542	T	A	missense_variant	ACSL4	1	15,5,23,7	26,9,0,0	25,17,0,0	0.6	0	0
465	F	X	13754781	GTTT	GTTTT	frameshift_variant	OFD1	0.162938	2,6,0,6	3,13,0,0	4,32,0,0	0.428571	0	0
466	F	X	49855335	C	T	stop_gained	CLCN5	1	55,8,38,2	35,8,0,0	103,10,0,0	0.38835	0	0
467	F	X	130411940	A	C	missense_variant	IGSF1	0.999976	8,5,5,4	4,4,0,0	19,11,0,0	0.409091	0	0
468	F	X	53277979	G	A	missense_variant	IQSEC2	1	27,20,24,8	20,15,0,0	45,31,0,0	0.405063	0	0
469	F	X	10162971	G	A	missense_variant	CLCN4	1	17,0,14,1	11,3,0,0	38,3,0,0	0.46875	0	0
471	F	X	41202544	CAAAA	CAAA	frameshift_variant	DDX3X	1	20,12,16,14	10,7,0,0	40,31,0,0	0.483871	0	0
472	F	X	125955332	T	C	synonymous_variant	PRR32	0.888184	28,16,7,2	34,14,0,0	50,23,0,0	0.169811	0	0
473	F	X	71681922	G	A	stop_gained	HDAC8	1	13,10,13,14	14,19,0,0	26,25,0,0	0.54	0	0
475	F	X	54037638	T	C	missense_variant	PHF8	1	27,13,32,12	32,7,0,0	50,21,0,0	0.52381	0	0
477	F	X	10085438	C	T	stop_gained	WWC3	1	8,28,8,24	6,29,0,0	16,53,0,0	0.470588	0	0
480	F	X	77243790	C	T	missense_variant	ATP7A	1	29,4,23,3	27,10,0,0	75,19,0,0	0.440678	0	0
482	F	X	71708867	C	T	missense_variant	HDAC8	1	16,17,10,13	25,28,0,0	48,45,0,0	0.410714	0	0
484	F	X	53228322	G	A	stop_gained	KDM5C	1	24,37,24,39	20,35,0,0	35,70,0,0	0.508065	0	0
485	F	X	153197563	C	G	missense_variant	NAA10	0.999809	3,15,5,8	5,7,0,0	9,18,0,0	0.419355	0	0
487	F	X	153175270	G	A	missense_variant	ARHGAP4	0.33386	3,4,1,3	3,4,0,0	20,14,0,0	0.363636	0	0
490	F	X	12838773	G	A	missense_variant	PRPS2	1	22,6,22,4	25,2,0,0	29,12,0,0	0.481481	0	0
491	F	X	64709202	C	T	missense_variant	ZC3H12B	1	28,10,19,13	20,21,0,0	44,45,0,0	0.457143	0	0
492	F	X	48935311	CT	CTT	frameshift_variant	WDR45	1	13,36,8,29	16,30,0,0	34,67,0,0	0.430233	0	0
493	F	X	133547986	A	G	missense_variant	PHF6	0.999994	4,13,2,20	2,17,0,0	7,25,0,0	0.564103	0	0
494	F	X	47102107	A	G	missense_variant	USP11	0.961537	2,3,1,3	1,4,0,0	3,24,0,0	0.444444	0	0
495	F	X	53441941	C	T	missense_variant	SMC1A	1	20,11,10,19	10,14,0,0	43,48,0,0	0.483333	0	0
496	F	X	53265016	T	A	splice_acceptor_variant	IQSEC2	0.147659	8,3,1,3	3,2,0,0	3,12,0,0	0.266667	0	0
498	F	X	37658209	C	T	stop_gained	CYBB	1	29,3,23,5	23,6,0,0	46,17,0,0	0.466667	0	0
499	F	X	48934337	TTGGTG	TTG	inframe_deletion	WDR45	1	29,13,17,10	15,17,0,0	40,28,0,0	0.391304	0	0
500	F	X	41088918	C	A	stop_gained	USP9X	1	31,6,23,5	27,3,0,0	69,20,0,0	0.430769	0	0
501	F	X	49021377	C	T	synonymous_variant	MAGIX	0.0909091	22,24,5,3	9,13,0,0	20,15,0,0	0.148148	0	0
502	F	X	103045509	C	T	stop_gained	PLP1	1	9,22,4,28	3,20,0,0	9,53,0,0	0.507937	0	0
505	F	X	153296806	G	A	missense_variant	MECP2	1	7,28,4,24	10,33,0,0	18,57,0,0	0.444444	0	0
506	F	X	64719791	C	T	missense_variant	ZC3H12B	1	15,7,7,3	20,10,0,0	55,22,0,0	0.3125	0	0
507	F	X	48762555	G	C	missense_variant	SLC35A2	1	18,24,17,29	10,23,0,0	34,48,0,0	0.522727	0	0
508	F	X	21996200	AAACTAA	AAA	frameshift_variant	SMS	0.913061	12,6,5,5	6,11,0,0	18,20,0,0	0.357143	0	0
510	F	X	62898421	C	A	missense_variant	ARHGEF9	1	11,23,10,11	7,21,0,0	24,31,0,0	0.381818	0	0
511	F	X	48895942	G	A	missense_variant	TFE3	1	10,15,3,11	2,10,0,0	13,25,0,0	0.358974	0	0
514	F	X	30260624	TAAAA	TAAA	frameshift_variant	MAGEB4	1	13,22,27,31	11,12,0,0	47,43,0,0	0.623656	0	0
516	F	X	76855939	C	T	stop_gained	ATRX	1	24,9,28,4	29,10,0,0	53,8,0,0	0.492308	0	0
518	F	X	44923050	TAA	TAAA	frameshift_variant	KDM6A	1	8,28,9,26	10,29,0,0	11,52,0,0	0.492958	0	0
519	F	X	48932571	G	T	stop_gained	WDR45	0.999999	12,5,13,6	12,6,0,0	20,15,0,0	0.527778	0	0
521	F	X	41204503	G	T	stop_gained	DDX3X	1	10,1,13,6	33,12,0,0	57,40,0,0	0.633333	0	0
522	F	X	153296777	G	A	stop_gained	MECP2	1	18,41,16,41	19,29,0,0	22,69,0,0	0.491379	0	0
523	F	X	18969295	G	A	synonymous_variant	PHKA2	0.999619	8,4,7,4	7,8,0,0	14,12,0,0	0.478261	0	0
524	F	X	119760432	A	C	missense_variant	C1GALT1C1	1	16,29,19,29	21,28,0,0	29,40,0,0	0.516129	0	0
527	F	X	153051836	G	A	synonymous_variant	IDH3G	1	16,17,14,14	26,21,0,0	43,34,0,0	0.459016	0	0
527	F	X	71792556	A	C	missense_variant	HDAC8	1	29,7,34,12	37,11,0,0	56,17,0,0	0.560976	0	0
3	M	X	53244975	A	G	splice_donor_variant	KDM5C	0.999988	0,0,7,2	4,3,0,0	21,11,0,0	1	0	0
7	M	X	41027299	C	T	missense_variant	USP9X	1	0,0,15,6	24,8,0,0	43,19,0,0	1	0	0
9	M	X	23411077	ACC	AC	frameshift_variant	PTCHD1	1	0,0,39,23	39,21,0,0	72,41,0,0	1	0	0
16	M	X	48933541	C	A	missense_variant	WDR45	0.386863	3,2,4,5	3,9,0,0	21,24,0,0	0.642857	0	0
17	M	X	79980448	C	T	missense_variant	BRWD3	1	0,0,14,5	4,4,0,0	24,21,0,0	1	0	0
24	M	X	70467711	A	G	missense_variant	ZMYM3	0.396678	0,0,2,5	0,8,0,0	1,14,0,0	1	0	0
25	M	X	153134145	G	A	missense_variant	L1CAM	0.999998	0,0,7,7	9,16,0,0	19,16,0,0	1	0	0
27	M	X	41530728	C	T	missense_variant	CASK	1	0,0,15,12	21,15,0,0	27,29,0,0	1	0	0
34	M	X	53267354	GC	GCC	frameshift_variant	IQSEC2	0.932596	0,0,4,1	7,0,0,0	5,1,0,0	1	0	0
40	M	X	153588696	G	A	missense_variant	FLNA	0.999809	0,1,10,4	11,7,0,0	16,12,0,0	0.933333	0	0
43	M	X	26212081	T	C	missense_variant	MAGEB6	1	0,2,22,20	17,13,0,0	45,36,0,0	0.954545	0	0
50	M	X	153628831	T	G	missense_variant	RPL10	0.961713	0,0,1,2	11,11,0,0	18,23,0,0	1	0	0
57	M	X	44879925	C	T	stop_gained	KDM6A	1	0,0,51,30	47,37,0,0	131,74,0,0	1	0	0
59	M	X	129173111	G	T	splice_acceptor_variant	BCORL1	1	0,0,19,18	23,15,0,0	61,45,0,0	1	0	0
64	M	X	41413137	G	A	missense_variant	CASK	1	0,0,11,11	5,9,0,0	18,25,0,0	1	0	0
69	M	X	53561062	C	G	missense_variant	HUWE1	1	0,0,7,20	8,23,0,0	13,40,0,0	1	0	0
70	M	X	24229365	C	T	missense_variant	ZFX	1	0,0,50,13	30,18,0,0	64,35,0,0	1	0	0
78	M	X	70517750	C	T	stop_gained	NONO	0.999618	0,0,5,13	5,11,0,0	15,12,0,0	1	0	0
79	M	X	40570452	CATGAT	CAT	inframe_deletion	MED14	1	0,0,8,19	28,44,0,0	33,52,0,0	1	0	0
82	M	X	47058630	A	G	missense_variant	UBA1	1	0,0,28,19	30,28,0,0	50,65,0,0	1	0	0
85	M	X	48896828	C	T	missense_variant	TFE3	0.0398324	0,0,3,5	5,3,0,0	8,3,0,0	1	0	0
92	M	X	21619469	T	A	splice_donor_variant	CNKSR2	1	0,0,1,18	0,34,0,0	8,49,0,0	1	0	0
94	M	X	70627912	G	A	missense_variant	TAF1	1	0,0,22,19	21,28,0,0	40,31,0,0	1	0	0
95	M	X	152955940	A	T	missense_variant	SLC6A8	0.993981	0,0,1,6	1,18,0,0	0,23,0,0	1	0	0
101	M	X	53285132	GCCCCCC	GCCCCC	frameshift_variant	IQSEC2	0.999972	0,0,4,26	0,20,0,0	5,37,0,0	1	0	0
103	M	X	153215855	A	G	missense_variant	HCFC1	1	0,0,18,10	32,25,0,0	49,36,0,0	1	0	0
117	M	X	24006634	C	A	stop_gained	KLHL15	1	1,0,19,14	40,34,0,0	54,47,0,0	0.970588	0	0
120	M	X	76763929	TA	TAA	frameshift_variant	ATRX	1	0,0,20,16	32,29,0,0	41,47,0,0	1	0	0
124	M	X	70608626	C	T	missense_variant	TAF1	1	0,1,26,18	22,31,0,0	52,47,0,0	0.977778	0	0
128	M	X	41646533	A	C	missense_variant	CASK	1	0,0,5,23	5,24,0,0	9,45,0,0	1	0	0
130	M	X	138850486	A	C	missense_variant	ATP11C	1	5,3,15,25	20,36,0,0	44,45,0,0	0.833333	0	0
133	M	X	118975168	TTTTCTTTCT	TTTTCT	frameshift_variant	UPF3B	0.965045	0,0,49,5	29,7,0,0	1,7,0,0	1	0	0
140	M	X	24197660	ATGTGT	ATGT	frameshift_variant	ZFX	1	0,0,21,58	21,59,0,0	51,97,0,0	1	0	0
143	M	X	147010283	T	C	missense_variant	FMR1	1	0,0,54,85	49,78,0,0	59,79,0,0	1	0	0
148	M	X	69385811	A	G	missense_variant	IGBP1	1	0,0,5,12	4,8,0,0	17,37,0,0	1	0	0
155	M	X	23411706	C	T	stop_gained	PTCHD1	1	0,1,9,23	12,19,0,0	23,45,0,0	0.969697	0	0
163	M	X	65392435	T	A	missense_variant	HEPH	1	1,0,18,16	13,8,0,0	39,30,0,0	0.971429	0	0
164	M	X	111195437	C	T	missense_variant	TRPC5	1	1,2,19,33	23,43,0,0	25,49,0,0	0.945455	0	0
173	M	X	118975168	TTTTCTTTCT	TTTTCT	frameshift_variant	UPF3B	1	0,0,40,6	32,10,0,0	58,19,0,0	1	0	0
176	M	X	48896816	C	T	missense_variant	TFE3	0.247852	0,0,2,3	0,3,0,0	8,6,0,0	1	0	0
183	M	X	152969428	CA	CAA	frameshift_variant	BCAP31	1	0,0,9,8	7,11,0,0	23,24,0,0	1	0	0
186	M	X	53642776	C	T	missense_variant	HUWE1	1	0,0,4,5	5,16,0,0	16,24,0,0	1	0	0
192	M	X	10422908	A	T	splice_donor_variant	MID1	1	0,0,36,17	31,10,0,0	38,19,0,0	1	0	0
210	M	X	119064042	A	G	missense_variant	NKAP	1	1,0,23,16	32,17,0,0	94,61,0,0	0.975	0	0
215	M	X	53239931	C	T	missense_variant	KDM5C	1	0,1,15,15	4,10,0,0	30,21,0,0	0.967742	0	0
220	M	X	128957700	G	A	missense_variant	ZDHHC9	1	0,0,4,10	8,13,0,0	13,30,0,0	1	0	0
228	M	X	54043027	C	T	splice_donor_variant	PHF8	1	0,0,14,3	24,5,0,0	67,4,0,0	1	0	0
231	M	X	133559286	C	T	stop_gained	PHF6	1	0,0,16,9	19,9,0,0	28,27,0,0	1	0	0
234	M	X	64743992	C	T	missense_variant	LAS1L	1	0,0,20,4	9,6,0,0	19,19,0,0	1	0	0
237	M	X	53239933	T	C	missense_variant	KDM5C	1	0,0,8,9	20,20,0,0	14,27,0,0	1	0	0
239	M	X	107169390	A	C	missense_variant	MID2	1	0,0,5,7	4,5,0,0	28,23,0,0	1	0	0
242	M	X	54013549	G	A	stop_gained	PHF8	1	0,0,8,6	12,7,0,0	21,19,0,0	1	0	0
244	M	X	144905875	G	A	synonymous_variant	SLITRK2	1	0,0,17,39	11,16,0,0	50,72,0,0	1	0	0
245	M	X	122745363	G	T	missense_variant	THOC2	1	0,0,17,5	13,3,0,0	31,9,0,0	1	0	0
251	M	X	102885138	AGAAGGAAG	AGAAG	frameshift_variant	TCEAL1	1	0,0,22,5	36,10,0,0	87,29,0,0	1	0	0
253	M	X	41495850	T	A	missense_variant	CASK	1	0,0,16,6	10,7,0,0	41,21,0,0	1	0	0
254	M	X	84526782	C	T	missense_variant	ZNF711	1	0,0,3,7	6,22,0,0	13,43,0,0	1	0	0
255	M	X	118971927	CCTCTCTCT	CCTCT	frameshift_variant	UPF3B	1	0,0,19,6	11,6,0,0	26,20,0,0	1	0	0
261	M	X	73961874	G	A	stop_gained	NEXMIF	1	0,0,27,13	18,10,0,0	48,23,0,0	1	0	0
272	M	X	48760017	C	T	stop_gained	PQBP1	1	0,2,39,13	42,18,0,0	98,27,0,0	0.962963	0	0
275	M	X	53578253	C	T	missense_variant	HUWE1	1	0,0,10,14	15,19,0,0	26,30,0,0	1	0	0
290	M	X	114424717	G	A	missense_variant	RBMXL3	1	0,0,15,3	26,11,0,0	33,22,0,0	1	0	0
292	M	X	53270970	A	G	missense_variant	IQSEC2	1	1,1,12,13	13,10,0,0	33,26,0,0	0.925926	0	0
294	M	X	21619442	AAGAGAGAG	AAGAGAG	frameshift_variant	CNKSR2	0.999928	0,0,1,5	4,4,0,0	8,10,0,0	1	0	0
305	M	X	119669704	AACACACA	AACACA	frameshift_variant	CUL4B	1	1,3,18,16	22,20,0,0	78,34,0,0	0.894737	0	0
313	M	X	110435814	TAAGAA	TAA	inframe_deletion	PAK3	0.999712	0,0,0,7	0,3,0,0	0,14,0,0	1	0	0
328	M	X	122551283	A	G	missense_variant	GRIA3	1	0,0,41,10	31,4,0,0	72,20,0,0	1	0	0
330	M	X	153296881	C	T	missense_variant	MECP2	0.993981	0,0,3,8	2,12,0,0	2,21,0,0	1	0	0
332	M	X	41205628	C	T	missense_variant	DDX3X	0.999997	0,0,10,15	12,9,0,0	17,17,0,0	1	0	0
336	M	X	153215760	T	C	missense_variant	HCFC1	0.999593	0,0,4,1	7,3,0,0	22,5,0,0	1	0	0
338	M	X	153678277	G	A	missense_variant	FAM50A	1	1,0,19,16	16,16,0,0	31,23,0,0	0.972222	0	0
341	M	X	153596381	A	G	missense_variant	FLNA	1	0,0,6,16	5,15,0,0	10,33,0,0	1	0	0
342	M	X	53111758	CCCGCCGCCGCCGCCGCCGCCGC	CCCGCCGCCGCCGCCGCCGCCGCCGCCGC	inframe_insertion	TSPYL2	0.994833	0,0,0,4	2,5,0,0	4,3,0,0	1	0	0
346	M	X	46618379	AGCAGCAGCGGCAGCAGC	AGCAGCAGC	inframe_deletion	SLC9A7	0.999426	0,0,2,5	1,8,0,0	4,10,0,0	1	0	0
350	M	X	122766858	T	C	missense_variant	THOC2	1	0,0,2,16	7,22,0,0	7,33,0,0	1	0	0
352	M	X	153215934	C	T	missense_variant	HCFC1	1	0,0,1,7	8,10,0,0	18,23,0,0	1	0	0
353	M	X	48933228	C	T	missense_variant	WDR45	0.993981	0,0,4,6	0,3,0,0	9,14,0,0	1	0	0
356	M	X	73744208	G	A	missense_variant	SLC16A2	0.396678	2,0,19,5	7,6,0,0	11,4,0,0	0.923077	0	0
357	M	X	105161664	G	A	missense_variant	NRK	1	0,0,10,21	14,32,0,0	32,87,0,0	1	0	0
361	M	X	103431282	A	C	missense_variant	FAM199X	0.999998	0,0,2,15	4,22,0,0	3,32,0,0	1	0	0
365	M	X	53225896	C	A	stop_gained	KDM5C	1	0,0,20,10	16,11,0,0	35,37,0,0	1	0	0
367	M	X	9050644	T	C	synonymous_variant	FAM9B	1	1,0,34,6	39,18,0,0	79,21,0,0	0.97561	0	0
374	M	X	129201465	A	G	missense_variant	ELF4	1	0,0,14,20	10,10,0,0	18,30,0,0	1	0	0
382	M	X	152955868	G	A	missense_variant	SLC6A8	0.999994	0,0,11,13	12,12,0,0	18,15,0,0	1	0	0
383	M	X	48676758	G	A	missense_variant	HDAC6	1	0,0,13,24	19,36,0,0	49,69,0,0	1	0	0
386	M	X	103041590	C	A	missense_variant	PLP1	1	0,0,13,33	7,20,0,0	32,50,0,0	1	0	0
391	M	X	71425749	GAAAA	GAA	frameshift_variant	ERCC6L	1	0,0,31,25	32,34,0,0	56,76,0,0	1	0	0
397	M	X	70346846	G	C	missense_variant	MED12	1	1,1,23,11	20,17,0,0	23,28,0,0	0.944444	0	0
402	M	X	44929460	ATT	ATTT	frameshift_variant	KDM6A	1	1,2,5,26	6,39,0,0	19,55,0,0	0.911765	0	0
427	M	X	47045655	A	G	splice_acceptor_variant	RBM10	1	0,0,28,10	36,25,0,0	54,26,0,0	1	0	0
430	M	X	100536729	C	A	missense_variant	TAF7L	1	0,0,0,10	4,17,0,0	10,31,0,0	1	0	0
447	M	X	56276713	T	C	synonymous_variant	KLF8	1	0,1,8,9	10,10,0,0	22,20,0,0	0.944444	0	0
450	M	X	153184372	C	T	missense_variant	ARHGAP4	1	0,0,11,14	7,6,0,0	32,26,0,0	1	0	0
451	M	X	13786261	AC	ACC	frameshift_variant	OFD1	1	0,0,11,0	19,3,0,0	31,11,0,0	1	0	0
453	M	X	41204534	G	A	missense_variant	DDX3X	1	0,0,19,26	23,23,0,0	52,49,0,0	1	0	0
456	M	X	53239879	TAA	TAAA	frameshift_variant	KDM5C	1	0,0,8,17	17,19,0,0	29,46,0,0	1	0	0
459	M	X	54022137	G	A	missense_variant	PHF8	0.999998	0,0,13,3	34,8,0,0	25,10,0,0	1	0	0
461	M	X	20211676	C	A	missense_variant	RPS6KA3	0.999238	0,1,9,11	3,9,0,0	11,15,0,0	0.952381	0	0
470	M	X	41413072	G	A	stop_gained	CASK	0.557312	0,11,4,9	4,14,0,0	12,37,0,0	0.541667	0	0
476	M	X	100667592	C	T	missense_variant	HNRNPH2	1	0,0,10,21	11,23,0,0	41,58,0,0	1	0	0
481	M	X	53106839	G	A	missense_variant	GPR173	1	0,1,20,31	28,29,0,0	36,68,0,0	0.980769	0	0
488	M	X	53561642	C	G	missense_variant	HUWE1	0.999999	0,1,3,3	5,9,0,0	14,24,0,0	0.857143	0	0
489	M	X	9864436	C	T	missense_variant	SHROOM2	1	0,0,13,37	26,48,0,0	46,102,0,0	1	0	0
497	M	X	108902726	A	C	missense_variant	ACSL4	1	0,0,3,30	11,39,0,0	15,122,0,0	1	0	0
503	M	X	40562748	G	T	missense_variant	MED14	1	0,0,11,7	21,10,0,0	22,15,0,0	1	0	0
504	M	X	53270997	C	T	missense_variant	IQSEC2	0.999904	0,0,11,16	14,17,0,0	15,14,0,0	1	0	0
509	M	X	20213206	GGATGAT	GGAT	inframe_deletion	RPS6KA3	1	0,0,11,26	17,21,0,0	27,33,0,0	1	0	0
512	M	X	20222199	G	C	stop_gained	RPS6KA3	1	0,0,1,8	3,16,0,0	10,38,0,0	1	0	0
513	M	X	21861288	T	C	missense_variant	MBTPS2	0.999999	0,1,19,2	14,1,0,0	34,2,0,0	0.954545	0	0
517	M	X	13770833	C	A	missense_variant	OFD1	1	0,0,13,10	11,9,0,0	37,23,0,0	1	0	0
520	M	X	22065166	A	G	splice_acceptor_variant	PHEX	0.996975	0,0,24,0	25,0,0,0	23,1,0,0	1	0	0
525	M	X	48336499	C	T	missense_variant	FTSJ1	0.999976	3,3,20,32	5,11,0,0	8,23,0,0	0.896552	0	0
526	M	X	53458762	C	T	synonymous_variant	HSD17B10	0.999952	0,0,23,1	19,0,0,0	29,1,0,0	1	0	0
529	M	X	53280026	A	C	missense_variant	IQSEC2	1	0,0,13,8	16,21,0,0	23,24,0,0	1	0	0
