# Supplementary material for: The contribution of X-linked coding variation to severe developmental disorders
Source: Nat Commun. 2021 Jan 27;12:627. doi: 10.1038/s41467-020-20852-3 (PMC7840967; doi:10.1038/s41467-020-20852-3)
Supplement: Supplementary file 6 — Supplementary Data 3 [file 41467_2020_20852_MOESM6_ESM.xlsx]

## Sheet: Supplementary_Table_4.tests_per
Supplementary Data 3: Variant counts and results from gene-based tests using TADA to analyse de novo and inherited variants in males, or de novo enrichment tests in males and females. We have indicated the inheritance mode(s) from DDG2P for all genes that are ‘confirmed’ or ‘probable’ DDG2P genes, and separately for all ‘possible’ DDG2P genes. We have also indicated the inheritance mode/s annotat…
gene	inheritance mode			# de novos in females		# robust de novos in males		# variants in males, excluding de novos		# variants in fathers (controls)		TADA output							p-values from de novo enrichment tests (Poisson)
	DDG2P confirmed/probable gene	OMIM gene also in DDG2P	DDG2P possible gene									Bayes Factor			q-value		p-value		mega-analysis of males and females		females only		males only
				PTV	missense/inframe	PTV	missense/inframe	PTV	missense/inframe	PTV	missense/inframe	PTV	missense/inframe	combined	PTV	combined	PTV	combined	PTV	PTV + missense/inframe	PTV	PTV + missense/inframe	PTV	PTV + missense/inframe
CASK	hemizygous; X-linked dominant	X-linked dominant		7	3	1	4	1	11	0	5	14.8181	56238.6	833348	0.244355	1.13996e-05	0.00218905	1.24378e-07	1.02516e-15	1.36211e-20	2.77883e-14	1.47661e-13	0.0112685	1.23851e-08
CDKL5	X-linked dominant	X-linked dominant		3	4	0	0	2	6	0	15	0.187027	0.00984807	0.00184185	0.929148	0.976511	0.362452	0.676317	1.8539e-05	9.67897e-08	8.67572e-06	1.70643e-08	1	1
CNKSR2	hemizygous	X-linked		2	0	2	0	1	7	0	7	2099.11	0.0085193	17.8829	0.00316471	0.105581	3.9801e-06	0.00010796	3.79193e-07	0.000343889	0.000901555	0.026307	7.70038e-05	0.0024903
DDX3X	hemizygous; X-linked dominant	X-linked recessive; X-linked dominant		21	27	0	2	0	10	1	11	0.0124074	23.8871	0.296378	0.964442	0.648969	0.896939	0.0090597	1.17449e-51	3.25618e-95	5.92406e-54	7.3705e-96	1	0.00152287
HDAC8	hemizygous; X-linked dominant	X-linked dominant		6	8	0	0	0	4	0	3	0.128057	0.0382227	0.00489466	0.949638	0.97108	0.57565	0.533222	1.1851e-13	8.65998e-24	2.53898e-14	2.36824e-25	1	1
HNRNPH2	X-linked dominant	X-linked dominant		1	7	0	1	0	2	0	2	0.143562	1.565	0.224675	0.946833	0.681168	0.535047	0.0108102	0.017969	6.70214e-14	0.0139253	5.33944e-13	1	0.0326605
HUWE1	hemizygous	X-linked		0	9	0	6	3	29	2	29	2.18727e-05	4402.03	0.0962841	0.967039	0.762815	0.99567	0.0161587	1	6.60956e-11	1	3.43174e-06	1	1.28917e-06
IQSEC2	hemizygous	X-linked dominant		5	4	4	4	1	10	0	12	5.40959e+07	1671.13	9.0401e+10	3.51228e-07	2.10175e-10	1.24378e-07	1.24378e-07	2.6639e-17	6.60319e-19	1.78809e-09	3.15662e-09	1.30636e-09	2.96733e-12
KDM5C	hemizygous	X-linked recessive		1	1	3	2	3	13	0	13	699928	1.17672	823623	1.37481e-05	1.52892e-05	1.24378e-07	1.24378e-07	1.27808e-06	3.55905e-06	0.0569648	0.0816302	7.94409e-07	3.45419e-07
KDM6A	X-linked dominant	X-linked dominant		2	3	2	1	0	23	1	16	82.0875	0.30004	24.6295	0.0688533	0.0683475	5.94527e-05	7.9602e-05	1.05344e-06	1.52243e-08	0.00150714	2.24971e-05	0.000126687	0.000121789
KIAA2022	hemizygous; X-linked dominant	X-linked dominant		4	0	1	0	4	15	0	17	95.3228	0.00230585	0.2198	0.045329	0.69514	5.02488e-05	0.0109729	4.85132e-09	9.32312e-05	1.53995e-07	0.000413172	0.0128482	0.0954579
MECP2	hemizygous; X-linked dominant	X-linked recessive; X-linked dominant; X-linked		11	13	0	1	2	15	0	20	0.54954	0.604124	0.33199	0.53546	0.609621	0.012395	0.00836741	7.42914e-27	1.35866e-42	4.48899e-28	3.4396e-43	1	0.0480002
MED12	hemizygous	X-linked recessive		1	7	0	1	0	30	0	12	0.00445988	0.129554	0.000577797	0.965585	0.979538	0.937207	0.799154	0.10465	1.77785e-07	0.0823604	3.18204e-07	1	0.162279
MSL3	X-linked dominant			3	0	1	0	1	6	0	5	43.5767	0.0303044	1.32056	0.108456	0.479256	0.00024801	0.00159826	1.11482e-08	2.73432e-05	9.27993e-07	0.000327093	0.00503159	0.035477
NAA10	hemizygous; X-linked dominant	X-linked recessive; X-linked dominant; X-linked		0	8	0	0	0	3	0	3	0.188774	0.0574662	0.0108481	0.927686	0.959373	0.355194	0.350371	1	9.32995e-14	1	1.2791e-14	1	1
PDHA1	hemizygous; X-linked dominant	X-linked dominant		3	2	0	0	0	2	1	4	0.0174662	0.0349537	0.000610508	0.96313	0.979418	0.858494	0.796566	2.14454e-06	7.79777e-07	1.00654e-06	2.29032e-07	1	1
PHF8	hemizygous	X-linked recessive		0	1	2	1	4	11	1	3	2933.29	0.463779	1360.4	0.00200359	0.00250397	2.48756e-06	2.48756e-07	0.00132354	0.000651345	1	0.257195	6.69642e-05	9.31357e-05
SMC1A	X-linked dominant	X-linked dominant		9	4	0	0	0	9	0	8	0.0278614	0.00265306	7.39181e-05	0.961297	0.981591	0.808097	0.912807	3.28786e-17	3.8625e-15	3.42829e-18	1.58326e-16	1	1
STAG2	hemizygous	X-linked		3	3	0	0	1	5	0	8	0.0479161	0.00675643	0.000323742	0.959242	0.980401	0.752794	0.838428	4.79013e-05	2.7406e-06	2.29071e-05	6.62478e-07	1	1
UPF3B	hemizygous	X-linked recessive		0	0	3	0	0	4	0	5	548864	0.0363883	19972.2	2.0704e-05	0.000249935	1.24378e-07	1.24378e-07	3.18848e-06	0.00053395	1	1	3.36524e-08	5.87021e-06
USP9X	hemizygous; X-linked dominant	X-linked recessive; X-linked dominant		8	2	0	1	0	21	1	19	0.000355527	0.00963872	3.42683e-06	0.966665	0.98236	0.984289	0.969904	1.49512e-12	9.07943e-10	2.03745e-13	1.20372e-09	1	0.161178
WDR45	X-linked dominant	X-linked dominant		12	3	1	3	0	7	0	6	24.3075	3083.98	74963.8	0.158184	7.48147e-05	0.00145622	1.24378e-07	6.14446e-33	1.05351e-33	2.06133e-31	5.1283e-27	0.0042	4.51171e-08
ZC4H2	hemizygous; X-linked dominant	X-linked recessive		5	1	0	1	0	3	0	2	0.193731	2.94973	0.571453	0.923927	0.545651	0.333857	0.00484154	1.06029e-12	2.6101e-12	2.97839e-13	5.362e-11	1	0.0167867
ABCB7	hemizygous	X-linked recessive		0	0	0	0	0	2	0	3	0.0681072	0.01629	0.00110946	0.957844	0.978264	0.719807	0.745824	1	1	1	1	1	1
ABCD1		X-linked recessive		0	0	0	0	0	5	0	4	0.102991	0.00864975	0.000890844	0.953747	0.97876	0.639327	0.767733	1	1	1	1	1	1
AC115618.1				0	0	0	0	0	3	0	1	0.213515	0.060145	0.0128419	0.900896	0.955229	0.232344	0.309028	1	1	1	1	1	1
ACE2				0	0	0	0	0	10	1	5	0.00875732	0.0220017	0.000192676	0.965044	0.980911	0.912774	0.868266	1	1	1	1	1	1
ACOT9				0	0	0	0	0	8	0	3	0.11597	0.0500704	0.00580664	0.951697	0.969444	0.607748	0.497835	1	1	1	1	1	1
ACRC				0	0	0	0	0	7	0	7	0.0973985	0.0112324	0.00109402	0.954535	0.978298	0.654569	0.747374	1	1	1	1	1	1
ACSL4	hemizygous	X-linked dominant		0	1	0	1	1	2	0	7	0.15696	1.40354	0.220299	0.942352	0.688316	0.481066	0.0109552	1	0.0181012	1	0.146463	1	0.044136
ACTRT1				0	0	0	0	0	9	0	4	0.176367	0.0531457	0.00937312	0.936287	0.962616	0.421117	0.393354	1	1	1	1	1	1
AF196779.12				0	0	0	0	0	0	0	0	0.158275	0.0421562	0.00667226	0.942009	0.967981	0.477466	0.476136	1	1	1	1	1	1
AFF2	hemizygous	X-linked recessive		0	0	0	0	0	11	0	12	0.0331252	0.00304219	0.000100773	0.960574	0.981419	0.785246	0.899293	1	1	1	1	1	1
AGTR2			hemizygous	0	0	0	0	0	3	1	15	0.0260456	0.128529	0.00334762	0.96146	0.973585	0.813981	0.588794	1	1	1	1	1	1
AIFM1	hemizygous	X-linked recessive		0	0	0	0	0	3	0	8	0.077339	0.0261258	0.00202054	0.957091	0.975904	0.705136	0.662971	1	1	1	1	1	1
AKAP14				0	0	0	0	0	3	0	2	0.184661	0.0706786	0.0130516	0.931222	0.954207	0.378447	0.303337	1	1	1	1	1	1
AKAP4				0	0	0	0	0	9	0	13	0.0800282	0.012586	0.00100724	0.956771	0.978465	0.697828	0.756534	1	1	1	1	1	1
AL353698.1				0	0	0	0	0	0	0	0	0.267002	0.124378	0.0332091	0.770299	0.840174	0.059695	0.0486838	1	1	1	1	1	1
ALAS2				0	0	0	0	0	7	0	6	0.11764	0.0225551	0.00265338	0.951379	0.974359	0.602543	0.619295	1	1	1	1	1	1
ALG13	X-linked dominant	X-linked dominant		0	3	0	0	1	11	0	20	0.0804702	0.00862657	0.000694182	0.956576	0.979203	0.693859	0.787973	1	0.00529923	1	0.00264911	1	1
AMELX				0	0	0	0	0	2	0	2	0.200044	0.0715078	0.0143047	0.918006	0.950838	0.302252	0.279865	1	1	1	1	1	1
AMER1		X-linked dominant		1	0	0	0	0	12	0	17	0.0429495	0.0046093	0.000197967	0.959479	0.980884	0.759646	0.866184	0.0480893	0.306213	0.0373862	0.245468	1	1
AMMECR1				0	1	0	0	1	1	0	0	0.325771	0.0398934	0.0129961	0.729012	0.954942	0.0431734	0.306721	1	0.130901	1	0.103607	1	1
AMOT				0	2	0	0	0	15	0	17	0.0418758	0.00444719	0.00018623	0.959655	0.981014	0.763742	0.870894	1	0.0549374	1	0.0352024	1	1
AP1S2	hemizygous	X-linked recessive		0	0	0	0	0	1	0	2	0.193461	0.07292	0.0141072	0.924549	0.951181	0.337471	0.283615	1	1	1	1	1	1
APEX2				0	0	0	0	0	5	1	6	0.0200329	0.0194258	0.000389155	0.962725	0.98029	0.84604	0.828843	1	1	1	1	1	1
APLN				0	0	0	0	0	3	0	4	0.243692	0.078809	0.0192051	0.849873	0.934522	0.12594	0.200355	1	1	1	1	1	1
APOO				0	0	0	0	0	3	0	3	0.185164	0.0798084	0.0147777	0.930886	0.95014	0.375959	0.271103	1	1	1	1	1	1
APOOL				0	0	0	0	0	6	1	3	0.0268315	0.0747191	0.00200483	0.961406	0.976069	0.812008	0.664826	1	1	1	1	1	1
AR		X-linked recessive		0	0	0	0	0	6	0	5	0.0616241	0.00472113	0.000290935	0.958337	0.980537	0.728922	0.84581	1	1	1	1	1	1
ARAF				0	0	0	0	0	4	0	4	0.084998	0.0123732	0.0010517	0.955508	0.978332	0.675059	0.752233	1	1	1	1	1	1
ARHGAP36				0	0	0	0	0	5	0	6	0.111599	0.0173585	0.00193719	0.952399	0.976272	0.618745	0.669882	1	1	1	1	1	1
ARHGAP4				0	2	0	1	0	16	1	14	0.00689589	0.109867	0.000757629	0.965361	0.979078	0.923494	0.779299	1	0.0107213	1	0.0483583	1	0.0940869
ARHGAP6				0	0	0	0	0	7	0	11	0.0553199	0.0040895	0.00022623	0.958642	0.980726	0.738171	0.85931	1	1	1	1	1	1
ARHGEF6			hemizygous	0	0	0	0	0	7	1	9	0.00852239	0.0161294	0.000137461	0.96509	0.981168	0.91412	0.886149	1	1	1	1	1	1
ARHGEF9	X-linked dominant	X-linked recessive		1	3	0	0	0	2	0	5	0.115049	0.0311249	0.0035809	0.952011	0.973384	0.612013	0.582558	0.0241496	3.84397e-05	0.0188627	1.47169e-05	1	1
ARL13A				0	1	0	0	2	5	1	6	0.105211	0.0597834	0.00628986	0.953454	0.968902	0.636179	0.486667	1	0.0769705	1	0.0600986	1	1
ARMCX1				0	0	0	0	0	4	0	6	0.155417	0.0338397	0.00525926	0.942803	0.970284	0.486022	0.517893	1	1	1	1	1	1
ARMCX2				0	0	0	0	0	5	0	10	0.137379	0.0202957	0.00278821	0.948137	0.974217	0.553442	0.612105	1	1	1	1	1	1
ARMCX3				0	0	0	0	0	3	0	6	0.179946	0.0448141	0.00806411	0.93394	0.965632	0.400146	0.43195	1	1	1	1	1	1
ARMCX4				0	0	0	0	0	5	0	10	0.0131406	0.000631922	8.30387e-06	0.964158	0.982202	0.88995	0.958868	1	1	1	1	1	1
ARMCX5				0	0	0	0	0	9	0	8	0.130706	0.0296274	0.00387248	0.949293	0.973026	0.570682	0.573153	1	1	1	1	1	1
ARMCX6				0	0	0	0	0	6	0	4	0.187223	0.0499349	0.00934898	0.928969	0.962715	0.362203	0.393634	1	1	1	1	1	1
ARR3				0	0	0	0	1	1	0	3	0.254009	0.0450988	0.0114555	0.808578	0.957912	0.0851386	0.337104	1	1	1	1	1	1
ARSD				0	0	0	0	1	10	0	6	0.201641	0.0152836	0.0030818	0.916489	0.973881	0.294253	0.598678	1	1	1	1	1	1
ARSE	hemizygous	X-linked recessive		0	0	0	0	0	7	0	10	0.101312	0.016616	0.0016834	0.95418	0.976822	0.647992	0.691511	1	1	1	1	1	1
ARSF				0	0	0	0	3	6	2	16	0.0169133	0.0319558	0.000540479	0.96333	0.979687	0.86314	0.804583	1	1	1	1	1	1
ARSH				0	0	0	0	3	6	2	6	0.0220844	0.0198011	0.000437296	0.962519	0.980121	0.83865	0.821009	1	1	1	1	1	1
ARX	hemizygous	X-linked recessive; X-linked		0	0	0	0	0	0	0	0	0.135295	0.0118535	0.00160371	0.948408	0.977051	0.55773	0.6983	1	1	1	1	1	1
ASB11				0	0	0	0	1	3	0	4	0.322348	0.0509765	0.0164321	0.735368	0.946933	0.0448657	0.246384	1	1	1	1	1	1
ASB12				0	0	0	0	0	6	0	4	0.182855	0.0436946	0.00798978	0.931719	0.9658	0.382213	0.435478	1	1	1	1	1	1
ASB9				0	0	0	0	0	4	0	3	0.18197	0.0544757	0.00991295	0.932371	0.961169	0.387178	0.373989	1	1	1	1	1	1
ATG4A				0	1	0	0	2	3	1	6	0.0811114	0.0521592	0.0042307	0.956445	0.972497	0.692081	0.561654	1	0.110987	1	0.0878359	1	1
ATP11C				0	0	0	1	0	9	1	11	0.00437667	0.346766	0.00151768	0.965674	0.977238	0.939459	0.706159	1	0.282603	1	1	1	0.0704027
ATP1B4				0	0	0	0	0	5	0	4	0.134749	0.04275	0.00576052	0.948498	0.969707	0.558968	0.500588	1	1	1	1	1	1
ATP2B3				0	0	0	0	0	21	0	25	0.0404599	0.000661077	2.67471e-05	0.960003	0.981902	0.769876	0.941427	1	1	1	1	1	1
ATP6AP1				0	0	0	0	0	3	0	3	0.123404	0.0242772	0.0029959	0.950482	0.973929	0.587336	0.601945	1	1	1	1	1	1
ATP6AP2		X-linked recessive	hemizygous	0	1	0	0	0	0	0	6	0.168465	0.0934248	0.0157388	0.93923	0.948302	0.447337	0.256582	1	0.0959112	1	0.0762988	1	1
ATP7A	hemizygous	X-linked recessive		0	1	0	0	0	17	0	23	0.0257296	0.00247591	6.3704e-05	0.961677	0.981688	0.817728	0.916727	1	0.35837	1	0.291112	1	1
ATRX	hemizygous	X-linked recessive; X-linked dominant		1	3	1	0	1	40	0	19	1.04493	0.012936	0.0135172	0.355531	0.952822	0.00545124	0.293125	0.00671806	0.000816758	0.0894311	0.00243405	0.0266004	0.14631
ATXN3L				0	0	0	0	0	5	0	3	0.167086	0.0511208	0.0085416	0.939982	0.964324	0.454775	0.415248	1	1	1	1	1	1
AVPR2				0	0	0	0	1	5	0	8	0.353693	0.0237857	0.00841283	0.695937	0.964682	0.0372174	0.419172	1	1	1	1	1	1
AWAT1				0	0	0	0	1	9	0	4	0.345836	0.0685425	0.0237045	0.703994	0.914409	0.0388604	0.139458	1	1	1	1	1	1
AWAT2				0	0	0	0	0	6	0	3	0.164585	0.052179	0.00858788	0.940954	0.964233	0.465253	0.414119	1	1	1	1	1	1
BCAP31	hemizygous	X-linked recessive		0	0	1	0	0	3	0	6	30.6288	0.0515556	1.57909	0.125606	0.43971	0.00095597	0.00130174	0.0129055	0.105079	1	1	0.00286343	0.0240032
BCOR	X-linked dominant	X-linked dominant		3	0	0	0	0	30	0	24	0.0184367	0.000626046	1.15422e-05	0.962878	0.982111	0.851265	0.954923	5.88802e-05	0.029129	2.77817e-05	0.0150109	1	1
BCORL1		X-linked recessive	hemizygous	0	0	1	0	0	17	0	29	2.61408	0.000442004	0.00115544	0.31533	0.978128	0.00404154	0.739352	0.0739409	0.494462	1	1	0.0170929	0.143472
BEND2				0	0	0	0	0	9	1	13	0.0113389	0.0147094	0.000166789	0.964676	0.981066	0.902472	0.87672	1	1	1	1	1	1
BEX1				0	0	0	0	0	1	0	0	0.234668	0.0902502	0.0211788	0.87385	0.925419	0.164502	0.171945	1	1	1	1	1	1
BEX2				0	0	0	0	1	3	0	0	0.456074	0.0856567	0.0390658	0.580339	0.809021	0.0182022	0.0276828	1	1	1	1	1	1
BEX4				0	0	0	0	0	1	0	2	0.223493	0.0891009	0.0199134	0.888412	0.93197	0.197234	0.1904	1	1	1	1	1	1
BEX5				0	1	0	0	0	5	0	3	0.253358	0.0907607	0.022995	0.811678	0.917459	0.0876246	0.146182	1	0.0350343	1	0.0271014	1	1
BGN	hemizygous	X-linked recessive; X-linked		0	0	0	0	0	8	0	5	0.158825	0.033998	0.00539972	0.941893	0.970094	0.476228	0.51196	1	1	1	1	1	1
BHLHB9				0	0	0	0	0	3	0	6	0.148191	0.0381669	0.00565601	0.945458	0.969837	0.518127	0.503684	1	1	1	1	1	1
BMP15				0	0	0	0	0	4	0	11	0.146027	0.0552571	0.00806904	0.945958	0.965548	0.524323	0.431696	1	1	1	1	1	1
BMX				0	0	0	0	0	12	3	11	0.000329141	0.0225563	7.42421e-06	0.966707	0.982248	0.985192	0.960153	1	1	1	1	1	1
BRCC3				0	0	0	0	1	2	0	0	0.326186	0.066222	0.0216007	0.725712	0.924202	0.0426244	0.168647	1	1	1	1	1	1
BRS3				0	0	0	0	0	6	0	8	0.151994	0.038148	0.00579825	0.944218	0.969576	0.50326	0.498184	1	1	1	1	1	1
BRWD3	hemizygous	X-linked recessive		1	0	0	1	1	16	1	16	0.00239488	0.0380972	9.12383e-05	0.966111	0.981542	0.959681	0.903423	0.0901785	0.117853	0.0707396	0.365873	1	0.123788
BTK				0	0	0	0	0	4	0	4	0.0761134	0.0194847	0.00148305	0.957407	0.977311	0.710621	0.709025	1	1	1	1	1	1
C1GALT1C1				0	1	0	0	0	1	0	4	0.186008	0.0660805	0.0122915	0.930202	0.956206	0.369898	0.318296	1	0.086333	1	0.0672016	1	1
CA5B				1	1	0	0	0	4	4	1	0.000109331	0.053387	5.83688e-06	0.966998	0.982293	0.991591	0.964841	0.0151866	0.00573986	0.0118095	0.00351415	1	1
CACNA1F				0	0	0	0	1	13	0	22	0.0142488	0.00024819	3.53641e-06	0.96387	0.982338	0.878584	0.969771	1	1	1	1	1	1
CAPN6				0	0	0	0	0	4	1	12	0.0133002	0.0336732	0.000447861	0.964063	0.980065	0.888054	0.819039	1	1	1	1	1	1
CCDC120				0	0	0	0	0	5	1	7	0.0144092	0.00796931	0.000114832	0.963773	0.98132	0.876684	0.894154	1	1	1	1	1	1
CCDC160				0	0	0	0	2	4	2	3	0.0174764	0.059632	0.00104216	0.96308	0.978399	0.857824	0.753333	1	1	1	1	1	1
CCDC22	hemizygous	X-linked recessive		0	0	0	0	0	2	0	13	0.082328	0.0398272	0.0032789	0.955982	0.973635	0.68425	0.591367	1	1	1	1	1	1
CCNB3				0	0	0	0	1	17	0	25	0.0767624	0.00408089	0.000313259	0.957218	0.980456	0.706918	0.840462	1	1	1	1	1	1
CD40LG				0	0	0	0	0	2	0	5	0.187658	0.0711391	0.0133498	0.928608	0.953448	0.360407	0.297277	1	1	1	1	1	1
CD99L2				0	0	0	0	2	4	0	7	0.628392	0.0567848	0.0356831	0.491899	0.814201	0.0102388	0.0305174	1	1	1	1	1	1
CDK16			hemizygous	0	0	0	1	1	4	0	4	0.174185	0.661324	0.115193	0.93712	0.745328	0.42746	0.0147109	1	0.214951	1	1	1	0.053298
CDR1				0	0	0	0	0	7	0	9	0.19664	0.0505929	0.0099486	0.921765	0.960954	0.321573	0.371601	1	1	1	1	1	1
CDX4				0	0	0	0	0	2	0	5	0.186274	0.0468768	0.00873194	0.930029	0.963865	0.368656	0.4104	1	1	1	1	1	1
CENPI				0	0	0	0	0	4	0	7	0.0802949	0.0262143	0.00210488	0.956641	0.975737	0.695093	0.65775	1	1	1	1	1	1
CETN2				0	0	0	0	0	0	0	0	0.207737	0.0853344	0.0177271	0.910948	0.94282	0.268981	0.228496	1	1	1	1	1	1
CFP				0	0	0	0	1	1	0	7	0.191789	0.0391709	0.00751254	0.926154	0.96677	0.345394	0.450851	1	1	1	1	1	1
CHDC2				0	2	0	0	0	10	0	6	0.120356	0.0482083	0.00580217	0.950975	0.96951	0.59648	0.497927	1	0.00828139	1	0.00516589	1	1
CHIC1				0	0	0	0	0	8	0	6	0.192791	0.0563484	0.0108634	0.925561	0.959255	0.342332	0.34995	1	1	1	1	1	1
CHM	hemizygous	X-linked dominant		0	0	0	0	1	6	0	11	0.172094	0.0273954	0.00471456	0.937929	0.971721	0.435358	0.54178	1	1	1	1	1	1
CHRDL1	hemizygous	X-linked recessive		0	0	0	0	0	2	0	4	0.106667	0.0352294	0.00375781	0.953007	0.973181	0.628334	0.576769	1	1	1	1	1	1
CHST7				0	0	0	0	0	2	0	0	0.135428	0.00563967	0.00076377	0.948318	0.979047	0.556492	0.778906	1	1	1	1	1	1
CITED1				0	0	0	0	0	0	0	2	0.206149	0.0786261	0.0162087	0.912409	0.947724	0.275186	0.249989	1	1	1	1	1	1
CLCN4	hemizygous	X-linked dominant		0	3	0	1	1	4	0	5	0.193428	0.348246	0.0673604	0.924754	0.778112	0.338037	0.0192383	1	0.000289947	1	0.00188093	1	0.0667155
CLCN5				1	0	0	0	0	6	0	11	0.0649317	0.0135019	0.000876703	0.957906	0.978857	0.721042	0.769129	0.0384269	0.239572	0.0299729	0.191713	1	1
CLDN2				0	0	0	0	0	1	1	0	0.031267	0.0724907	0.00226656	0.960743	0.975265	0.792252	0.646535	1	1	1	1	1	1
CLIC2		X-linked recessive	hemizygous	0	0	0	0	0	2	0	2	0.196971	0.0668653	0.0131705	0.921317	0.953602	0.319093	0.300073	1	1	1	1	1	1
CMC4				0	0	0	0	0	0	0	1	0.256302	0.113073	0.0289807	0.793159	0.873863	0.0740876	0.0706316	1	1	1	1	1	1
CNGA2				0	0	0	0	0	14	1	11	0.0142773	0.0162068	0.000231388	0.963821	0.980699	0.878044	0.858186	1	1	1	1	1	1
COL4A5				0	1	0	0	0	14	0	15	0.0166756	0.0029205	4.87011e-05	0.963429	0.981736	0.865706	0.924253	1	0.369617	1	0.303881	1	1
COL4A6				0	1	0	0	2	17	1	20	0.00782862	0.00132963	1.04092e-05	0.96518	0.982134	0.918255	0.956039	1	0.412685	1	0.338918	1	1
COX7B	X-linked dominant	X-linked dominant		0	0	0	0	0	0	0	1	0.255741	0.121342	0.0310321	0.795002	0.858292	0.0753299	0.0611634	1	1	1	1	1	1
CPXCR1				0	0	0	0	1	3	0	2	0.362908	0.0566942	0.0205748	0.687407	0.92774	0.0344137	0.179117	1	1	1	1	1	1
CSAG1				0	0	0	0	0	3	1	0	0.0347521	0.111976	0.00389141	0.960233	0.972974	0.77869	0.571811	1	1	1	1	1	1
CSTF2				0	0	0	0	0	8	0	3	0.0805227	0.0268936	0.00216555	0.956511	0.975567	0.693316	0.653112	1	1	1	1	1	1
CT45A1				0	0	0	0	0	0	0	0	0.245601	0.135184	0.0332013	0.838761	0.842012	0.117241	0.054896	1	1	1	1	1	1
CT45A2				0	0	0	0	0	0	0	0	0.245601	0.135184	0.0332013	0.839845	0.843808	0.117241	0.054896	1	1	1	1	1	1
CT45A3				0	0	0	0	0	0	0	0	0.245601	0.135184	0.0332013	0.840913	0.845563	0.117241	0.054896	1	1	1	1	1	1
CT45A4				0	0	0	0	0	0	0	0	0.245601	0.135184	0.0332013	0.841965	0.847279	0.117241	0.054896	1	1	1	1	1	1
CT45A5				0	0	0	0	0	2	0	1	0.218549	0.106749	0.0233299	0.89309	0.915451	0.21009	0.143121	1	1	1	1	1	1
CT45A6				0	0	0	0	0	0	0	0	0.245601	0.135184	0.0332013	0.843003	0.848956	0.117241	0.054896	1	1	1	1	1	1
CT47A1				0	0	0	0	0	0	0	0	0.213428	0.0895435	0.0191111	0.902014	0.935727	0.23607	0.20499	1	1	1	1	1	1
CT47A10				0	0	0	0	0	0	0	0	0.212634	0.0891888	0.0189646	0.904518	0.937453	0.24476	0.211661	1	1	1	1	1	1
CT47A11				0	0	0	0	0	0	0	0	0.213584	0.0898834	0.0191977	0.900517	0.934828	0.231102	0.201807	1	1	1	1	1	1
CT47A12				0	0	0	0	0	0	0	0	0.212698	0.0895054	0.0190376	0.904169	0.936888	0.243518	0.208951	1	1	1	1	1	1
CT47A2				0	0	0	0	0	0	0	0	0.213654	0.0929305	0.019855	0.900134	0.9323	0.22986	0.192279	1	1	1	1	1	1
CT47A3				0	0	0	0	0	0	0	0	0.213055	0.0907906	0.0193434	0.902745	0.933271	0.238553	0.195676	1	1	1	1	1	1
CT47A4				0	0	0	0	0	0	0	0	0.212813	0.0898296	0.0191169	0.903817	0.93543	0.242276	0.203744	1	1	1	1	1	1
CT47A5				0	0	0	0	0	0	0	0	0.214365	0.0932864	0.0199973	0.898171	0.93096	0.223653	0.188561	1	1	1	1	1	1
CT47A6				0	0	0	0	0	0	0	0	0.214259	0.0931275	0.0199534	0.89857	0.931636	0.224895	0.189863	1	1	1	1	1	1
CT47A7				0	0	0	0	0	0	0	0	0.213072	0.0907413	0.0193344	0.902381	0.933588	0.237312	0.196908	1	1	1	1	1	1
CT47A8				0	0	0	0	0	0	0	0	0.212981	0.0906042	0.019297	0.903105	0.933903	0.239793	0.198501	1	1	1	1	1	1
CT47A9				0	0	0	0	0	0	0	0	0.212817	0.0897934	0.0191096	0.903463	0.936022	0.241034	0.206217	1	1	1	1	1	1
CT47B1				0	0	0	0	0	7	1	7	0.0296284	0.0500451	0.00148275	0.961077	0.977348	0.801885	0.709159	1	1	1	1	1	1
CTAG1A				0	0	0	0	0	0	0	0	0.23452	0.0808744	0.0189667	0.874487	0.937172	0.165745	0.210427	1	1	1	1	1	1
CTAG1B				0	0	0	0	0	0	0	0	0.234462	0.0803963	0.0188499	0.875117	0.938008	0.166988	0.213555	1	1	1	1	1	1
CTAG2				0	0	0	0	1	4	0	2	0.445715	0.0522455	0.0232866	0.603221	0.915962	0.0199918	0.143268	1	1	1	1	1	1
CTPS2				0	0	0	0	0	3	1	10	0.0140268	0.0388576	0.000545046	0.963918	0.979658	0.880607	0.803876	1	1	1	1	1	1
CUL4B	hemizygous	X-linked recessive		0	1	1	0	5	7	0	3	343.298	0.018462	6.33797	0.0102045	0.254351	1.34328e-05	0.000252985	0.0424117	0.0278459	1	0.181155	0.00955891	0.0553946
CXCR3				0	0	0	0	0	3	0	4	0.164334	0.0245161	0.00402885	0.941073	0.972869	0.466491	0.566757	1	1	1	1	1	1
CXorf21				0	0	0	0	0	5	0	3	0.192059	0.0610908	0.011733	0.925958	0.957402	0.344812	0.330969	1	1	1	1	1	1
CXorf22				0	0	0	0	1	5	0	12	0.115063	0.0129115	0.00148563	0.951933	0.977275	0.610777	0.708396	1	1	1	1	1	1
CXorf23				0	0	0	0	0	11	1	9	0.0111512	0.0189619	0.000211448	0.964722	0.980805	0.903822	0.862558	1	1	1	1	1	1
CXorf24				0	0	0	0	0	0	0	1	0.245539	0.0948219	0.0232825	0.844026	0.916467	0.118484	0.14393	1	1	1	1	1	1
CXorf27				0	0	0	0	0	1	0	1	0.239397	0.0853633	0.0204357	0.865621	0.928482	0.150274	0.181105	1	1	1	1	1	1
CXorf28				0	0	0	0	2	1	0	1	1.04267	0.108284	0.112904	0.374045	0.749935	0.00571816	0.0150398	1	1	1	1	1	1
CXorf30				0	0	0	0	0	20	0	19	0.105477	0.0213401	0.00225089	0.953232	0.975309	0.633284	0.647442	1	1	1	1	1	1
CXorf31				0	0	0	0	0	3	0	0	0.254493	0.118808	0.0302359	0.806986	0.865228	0.0840279	0.063653	1	1	1	1	1	1
CXorf36				0	1	0	0	0	5	0	10	0.149459	0.0351001	0.00524602	0.945153	0.970347	0.514409	0.518475	1	0.145816	1	0.115509	1	1
CXorf38				0	0	0	0	0	3	0	9	0.144741	0.053033	0.00767603	0.946544	0.966453	0.531331	0.445828	1	1	1	1	1	1
CXorf40A				0	0	0	0	0	1	1	1	0.0331382	0.0766145	0.00253886	0.960518	0.974729	0.784018	0.628916	1	1	1	1	1	1
CXorf40B				0	0	0	0	0	1	1	1	0.0333015	0.0765966	0.00255078	0.960461	0.974638	0.783348	0.627837	1	1	1	1	1	1
CXorf48				0	0	0	0	0	0	0	0	0.177056	0.06338	0.0112218	0.936003	0.958287	0.418073	0.342972	1	1	1	1	1	1
CXorf56				0	0	0	0	0	1	0	1	0.183808	0.0634065	0.0116546	0.931388	0.95753	0.379687	0.333236	1	1	1	1	1	1
CXorf57				0	0	0	0	0	4	1	14	0.00813	0.0231157	0.00018793	0.965135	0.980963	0.91615	0.870178	1	1	1	1	1	1
CXorf58				0	0	0	0	4	4	1	2	0.372917	0.0505571	0.0188536	0.682955	0.937732	0.0335851	0.211977	1	1	1	1	1	1
CXorf61				0	0	0	0	0	0	0	0	0.239901	0.0957624	0.0229735	0.863377	0.917946	0.146292	0.147459	1	1	1	1	1	1
CXorf64				0	0	0	0	0	3	2	5	0.00422022	0.0548323	0.000231404	0.965762	0.980672	0.940698	0.858131	1	1	1	1	1	1
CXorf65				0	0	0	0	0	2	0	1	0.186461	0.0698831	0.0130305	0.92968	0.954356	0.366175	0.304886	1	1	1	1	1	1
CXorf66				0	0	0	0	0	2	0	3	0.177741	0.0548352	0.00974645	0.935717	0.961594	0.414354	0.378675	1	1	1	1	1	1
CXorf67				0	0	0	0	0	13	0	12	0.126259	0.0112584	0.00142148	0.950063	0.977638	0.581835	0.714467	1	1	1	1	1	1
CYBB				1	0	0	0	0	5	0	4	0.0887532	0.0264258	0.00234537	0.955233	0.975089	0.669	0.640429	0.0301871	0.168025	0.0234512	0.132663	1	1
CYLC1				0	0	0	0	0	11	1	7	0.0174184	0.0380569	0.000662892	0.963181	0.979326	0.85983	0.79218	1	1	1	1	1	1
CYSLTR1				0	0	0	0	0	7	1	7	0.0288367	0.0456242	0.00131565	0.961187	0.977709	0.804521	0.723612	1	1	1	1	1	1
DACH2				0	0	0	0	0	7	0	8	0.113796	0.0185961	0.00211616	0.952244	0.975695	0.615726	0.655692	1	1	1	1	1	1
DCAF12L1				0	0	0	0	0	4	0	3	0.150919	0.0150898	0.00227733	0.944638	0.975221	0.508216	0.646012	1	1	1	1	1	1
DCAF12L2				0	1	0	0	0	10	0	12	0.144925	0.013081	0.00189576	0.946448	0.976392	0.530093	0.67322	1	0.201632	1	0.159241	1	1
DCAF8L1				0	0	0	0	0	13	0	9	0.108432	0.019328	0.00209578	0.952781	0.975779	0.624623	0.658386	1	1	1	1	1	1
DCAF8L2				0	0	0	0	0	11	0	7	0.105898	0.0189828	0.00201025	0.953082	0.975987	0.630807	0.664557	1	1	1	1	1	1
DCX	hemizygous; X-linked dominant	X-linked		1	1	0	0	0	0	0	0	0.130819	0.0347363	0.00454417	0.949205	0.972003	0.569444	0.549855	0.0204766	0.0113894	0.015909	0.00699576	1	1
DDX26B				0	1	0	0	0	13	0	8	0.0528527	0.0178121	0.000941415	0.958823	0.97863	0.743009	0.763595	1	0.233857	1	0.186971	1	1
DDX53				0	1	0	0	0	7	0	9	0.102235	0.0185579	0.00189727	0.953964	0.976352	0.643717	0.673008	1	0.185903	1	0.146539	1	1
DGAT2L6				0	0	0	0	1	3	0	7	0.29507	0.0605394	0.0178634	0.747221	0.941628	0.0508092	0.224088	1	1	1	1	1	1
DIAPH2				0	0	0	0	1	11	0	15	0.0639922	0.00735911	0.000470925	0.958153	0.97995	0.724681	0.815555	1	1	1	1	1	1
DKC1	hemizygous	X-linked recessive		0	0	0	0	0	5	0	3	0.0900171	0.0285175	0.00256706	0.954886	0.974499	0.662816	0.625991	1	1	1	1	1	1
DLG3	hemizygous	X-linked recessive		0	0	0	0	1	8	0	5	0.109401	0.0108562	0.00118767	0.952628	0.977956	0.621887	0.735329	1	1	1	1	1	1
DMD	hemizygous	X-linked recessive; X-linked		1	1	0	0	0	46	0	52	0.00013189	1.09047e-05	1.43822e-09	0.966916	0.982646	0.990843	0.997669	0.183967	0.325477	0.145732	0.22863	1	1
DMRTC1				0	0	0	0	0	0	0	0	0.212511	0.0857199	0.0182164	0.905207	0.94013	0.247244	0.221244	1	1	1	1	1	1
DMRTC1B				0	0	0	0	0	0	0	0	0.213659	0.0871419	0.0186186	0.899748	0.938552	0.228618	0.215487	1	1	1	1	1	1
DNASE1L1				1	0	0	0	0	3	1	4	0.0250947	0.0411808	0.00103342	0.96189	0.978432	0.822937	0.754485	0.0138972	0.117128	0.0107754	0.0918694	1	1
DOCK11				0	0	0	0	2	7	1	20	0.00443124	0.00367551	1.6287e-05	0.965629	0.982042	0.938116	0.950167	1	1	1	1	1	1
DRP2				0	0	0	0	0	6	0	14	0.0443717	0.0107466	0.000476847	0.95936	0.979892	0.757185	0.814434	1	1	1	1	1	1
DUSP21				0	0	0	0	0	3	0	4	0.226517	0.0526837	0.0119337	0.883802	0.956879	0.185909	0.325617	1	1	1	1	1	1
DUSP9				0	0	0	0	0	5	0	6	0.174153	0.0260729	0.00454069	0.937256	0.972059	0.428699	0.550139	1	1	1	1	1	1
DYNLT3				0	0	0	0	0	1	0	1	0.224541	0.0993478	0.0223077	0.88692	0.921199	0.193508	0.158423	1	1	1	1	1	1
EBP	X-linked dominant	X-linked recessive; X-linked dominant		0	1	0	0	0	0	0	0	0.186598	0.0690898	0.012892	0.929504	0.955086	0.364935	0.308458	1	0.0795272	1	0.0628709	1	1
EDA	hemizygous	X-linked recessive; X-linked dominant		0	0	0	0	0	3	0	1	0.153286	0.033355	0.00511286	0.943357	0.970596	0.492786	0.523086	1	1	1	1	1	1
EDA2R				0	0	0	0	0	0	0	6	0.171731	0.0948088	0.0162816	0.938062	0.947332	0.436849	0.248763	1	1	1	1	1	1
EFHC2				0	0	0	0	0	12	0	18	0.0764008	0.0147097	0.00112383	0.957344	0.978196	0.709387	0.742822	1	1	1	1	1	1
EFNB1	X-linked over-dominant	X-linked dominant		0	0	0	0	0	7	0	3	0.168962	0.0372076	0.00628668	0.938975	0.968971	0.445535	0.486766	1	1	1	1	1	1
EGFL6				0	1	0	0	2	7	0	15	0.375709	0.0325333	0.012223	0.678373	0.956342	0.0328585	0.319126	1	0.174638	1	0.138263	1	1
EIF1AX				0	0	0	0	0	0	0	0	0.214484	0.103647	0.0222306	0.896537	0.922515	0.218688	0.16242	1	1	1	1	1	1
EIF2S3	hemizygous	X-linked recessive		0	0	0	0	1	1	0	3	0.273463	0.0399135	0.0109149	0.763106	0.958897	0.0559657	0.348417	1	1	1	1	1	1
ELF4				0	0	0	1	0	8	0	9	0.107948	0.716209	0.0773132	0.952856	0.770716	0.62586	0.0178923	1	0.196153	1	1	1	0.0479264
ELK1				0	0	0	0	1	1	0	3	0.338992	0.0304993	0.010339	0.711621	0.960291	0.0406801	0.361798	1	1	1	1	1	1
EMD				0	0	0	0	0	3	0	3	0.188294	0.0444766	0.00837469	0.927872	0.964771	0.356435	0.420284	1	1	1	1	1	1
ENOX2				1	0	0	0	2	2	2	5	0.0087859	0.0249463	0.000219176	0.964998	0.980779	0.911436	0.860991	0.0292963	0.188976	0.0228845	0.150776	1	1
ERAS				0	0	0	0	0	0	0	0	0.214475	0.0588844	0.0126292	0.896951	0.955513	0.219929	0.314405	1	1	1	1	1	1
ERCC6L				0	1	1	0	1	9	0	12	14.2149	0.00521215	0.0740904	0.257462	0.774473	0.00228159	0.0183515	0.0497855	0.0505282	1	0.240753	0.0115088	0.0787735
ESX1				0	0	0	0	0	6	0	14	0.153703	0.0309724	0.00476054	0.943247	0.971491	0.491545	0.538549	1	1	1	1	1	1
F8				0	0	0	0	0	17	0	28	0.00569436	0.000498914	2.84099e-06	0.965495	0.982405	0.931807	0.972021	1	1	1	1	1	1
F8A1				0	0	0	0	0	0	0	0	0.209085	0.134561	0.0281346	0.907858	0.87613	0.259048	0.0783495	1	1	1	1	1	1
F8A2				0	0	0	0	0	0	0	0	0.209085	0.134561	0.0281346	0.908178	0.877232	0.259048	0.0783495	1	1	1	1	1	1
F8A3				0	0	0	0	0	0	0	0	0.209085	0.134561	0.0281346	0.908495	0.878315	0.259048	0.0783495	1	1	1	1	1	1
F9				0	0	0	0	0	7	0	2	0.11528	0.0486385	0.00560703	0.951855	0.969902	0.610224	0.504787	1	1	1	1	1	1
FAAH2				0	0	0	0	1	10	1	12	0.0338853	0.0280807	0.000951522	0.960347	0.978564	0.781201	0.762507	1	1	1	1	1	1
FAM104B				0	0	0	0	0	2	0	1	0.235847	0.0959563	0.022631	0.871897	0.919373	0.160771	0.152732	1	1	1	1	1	1
FAM120C				0	0	0	0	0	9	0	10	0.0410909	0.00397421	0.000163304	0.95983	0.981092	0.766822	0.878413	1	1	1	1	1	1
FAM122B				0	0	0	0	0	1	0	2	0.171691	0.0644154	0.0110595	0.938194	0.958533	0.438089	0.346275	1	1	1	1	1	1
FAM122C				0	0	0	0	1	4	1	2	0.0595253	0.0764803	0.00455251	0.958398	0.971947	0.730664	0.548621	1	1	1	1	1	1
FAM127A				0	0	0	0	0	0	0	0	0.240457	0.0854278	0.0205417	0.86261	0.928113	0.145049	0.180367	1	1	1	1	1	1
FAM127B				0	0	0	0	0	2	0	1	0.243473	0.0731024	0.0177985	0.850802	0.942585	0.127182	0.226433	1	1	1	1	1	1
FAM127C				0	0	0	0	0	2	0	1	0.244969	0.0727824	0.0178294	0.84701	0.941871	0.122212	0.224507	1	1	1	1	1	1
FAM133A				0	0	0	0	0	2	0	6	0.199975	0.0954366	0.0190849	0.918253	0.936313	0.303493	0.206633	1	1	1	1	1	1
FAM155B				0	0	0	0	0	8	0	7	0.131918	0.0135838	0.00179196	0.94903	0.97659	0.566967	0.681016	1	1	1	1	1	1
FAM156A				0	0	0	0	0	0	0	0	0.189535	0.0637768	0.0120879	0.927309	0.956612	0.352159	0.32172	1	1	1	1	1	1
FAM156B				0	0	0	0	0	0	0	0	0.189523	0.0637646	0.0120849	0.927498	0.956746	0.353399	0.323023	1	1	1	1	1	1
FAM199X				0	0	0	1	1	4	0	4	0.325533	1.81005	0.589232	0.732229	0.530467	0.0437353	0.0046704	1	0.12153	1	1	1	0.0277164
FAM3A				0	1	0	0	0	1	0	1	0.195174	0.0557168	0.0108745	0.922863	0.959017	0.327655	0.349546	1	0.0954258	1	0.075527	1	1
FAM46D				0	0	0	0	0	4	0	3	0.176127	0.044659	0.00786566	0.936427	0.965965	0.422358	0.439084	1	1	1	1	1	1
FAM47A				0	0	0	0	0	15	0	19	0.0945626	0.00421138	0.000398239	0.954746	0.980234	0.658857	0.82704	1	1	1	1	1	1
FAM47B				0	1	0	0	0	10	0	11	0.122252	0.00733474	0.000896686	0.95073	0.978728	0.591389	0.767125	1	0.251918	1	0.200339	1	1
FAM47C				0	0	0	0	0	21	0	23	0.0817974	0.00167486	0.000137	0.956248	0.981194	0.68919	0.886375	1	1	1	1	1	1
FAM50A				0	0	0	1	1	4	0	4	0.281006	1.52607	0.428834	0.752756	0.56006	0.0522137	0.0064995	1	0.137447	1	1	1	0.0322964
FAM58A	X-linked dominant	X-linked dominant		1	0	0	0	0	7	0	2	0.198942	0.0785906	0.015635	0.919699	0.94868	0.310528	0.258599	0.0102499	0.0829395	0.00806411	0.0657573	1	1
FAM9A				0	0	0	0	0	4	0	14	0.169004	0.0962583	0.016268	0.938846	0.947529	0.444295	0.248828	1	1	1	1	1	1
FAM9B				0	0	0	0	0	2	0	6	0.197717	0.0796558	0.0157493	0.920633	0.948111	0.316045	0.256499	1	1	1	1	1	1
FAM9C				0	0	0	0	0	2	0	0	0.217804	0.0930376	0.0202639	0.893975	0.929208	0.212573	0.182502	1	1	1	1	1	1
FANCB	hemizygous	X-linked recessive		0	0	0	0	0	7	0	14	0.0836898	0.0206597	0.00172901	0.95578	0.976668	0.679991	0.686155	1	1	1	1	1	1
FATE1				0	0	0	0	1	2	0	0	0.418858	0.0759219	0.0318005	0.642002	0.853774	0.0261032	0.057698	1	1	1	1	1	1
FGD1	hemizygous	X-linked recessive		0	0	0	0	0	7	0	4	0.0519917	0.00503278	0.000261663	0.958883	0.980565	0.744647	0.852143	1	1	1	1	1	1
FGF13				0	0	0	1	0	4	1	2	0.0233003	2.76122	0.0643372	0.962155	0.781636	0.83251	0.0195898	1	0.0856465	1	1	1	0.0199321
FHL1	hemizygous	X-linked recessive; X-linked dominant; X-linked		0	0	0	0	0	4	0	5	0.169794	0.04774	0.00810595	0.938587	0.965378	0.441811	0.429601	1	1	1	1	1	1
FIGF				0	1	0	0	1	4	0	5	0.289868	0.0469106	0.0135979	0.750018	0.952663	0.0515087	0.291806	1	0.109448	1	0.0863875	1	1
FLNA	hemizygous; X-linked dominant	X-linked recessive; X-linked dominant; X-linked		0	1	0	2	0	19	0	29	0.00404385	0.00856061	3.46178e-05	0.965806	0.981831	0.944107	0.935578	1	0.118422	1	0.601165	1	0.0307387
FMR1	hemizygous	X-linked dominant; X-linked		0	0	0	1	1	4	0	4	0.187228	0.94725	0.177352	0.928789	0.730488	0.360962	0.012401	1	0.188215	1	1	1	0.0450321
FMR1NB				0	0	0	0	0	3	0	3	0.186427	0.055119	0.0102757	0.929855	0.960403	0.367415	0.363403	1	1	1	1	1	1
FOXO4				0	0	0	0	0	1	0	6	0.13103	0.0269286	0.00352845	0.949118	0.973485	0.568205	0.583829	1	1	1	1	1	1
FOXP3	hemizygous	X-linked recessive		0	2	0	0	0	1	0	3	0.127842	0.0335889	0.00429408	0.949809	0.972334	0.578125	0.558745	1	0.0123658	1	0.00763603	1	1
FOXR2				0	0	0	0	0	8	0	7	0.177914	0.0519032	0.00923427	0.935429	0.963009	0.411874	0.395914	1	1	1	1	1	1
FRMD7		X-linked	hemizygous	0	0	0	0	1	5	1	11	0.0259427	0.0254185	0.000659425	0.961569	0.979357	0.815283	0.792472	1	1	1	1	1	1
FRMPD3				0	0	0	0	1	30	0	34	0.0235835	0.00030222	7.12741e-06	0.962102	0.98227	0.829804	0.960951	1	1	1	1	1	1
FRMPD4	hemizygous	X-linked		0	0	0	0	1	14	1	13	0.0103716	0.00200329	2.07773e-05	0.964815	0.981949	0.906131	0.946839	1	1	1	1	1	1
FTHL17				0	0	0	0	0	3	0	3	0.225852	0.0556249	0.012563	0.884862	0.955653	0.188394	0.31508	1	1	1	1	1	1
FTSJ1	hemizygous	X-linked recessive		0	2	0	1	0	0	0	2	0.150804	2.19936	0.331672	0.944846	0.620284	0.510694	0.00837736	1	0.000317159	1	0.00461284	1	0.0282596
FUNDC1				0	0	0	0	0	0	0	0	0.213433	0.0980075	0.020918	0.901645	0.926209	0.234828	0.175075	1	1	1	1	1	1
FUNDC2				0	0	0	0	0	3	0	1	0.195711	0.0686488	0.0134354	0.922646	0.953293	0.325856	0.29602	1	1	1	1	1	1
G6PD				0	0	0	0	0	11	0	14	0.105789	0.0110568	0.00116968	0.953157	0.97799	0.632045	0.737044	1	1	1	1	1	1
GAB3				0	0	0	0	0	4	0	6	0.100186	0.0233175	0.00233608	0.954322	0.975133	0.650717	0.641925	1	1	1	1	1	1
GABRA3				0	2	0	0	0	4	0	2	0.12394	0.0303867	0.00376614	0.950399	0.973129	0.5861	0.57643	1	0.0126969	1	0.0078164	1	1
GABRE				0	0	0	0	2	6	0	8	0.550819	0.0237137	0.013062	0.52531	0.953907	0.0121405	0.302523	1	1	1	1	1	1
GABRQ				0	1	0	0	0	14	2	12	0.00210258	0.0140969	2.96399e-05	0.966283	0.981878	0.964194	0.939519	1	0.214165	1	0.1699	1	1
GAGE1				0	0	0	0	0	3	0	0	0.239279	0.113713	0.0272091	0.866351	0.89082	0.151517	0.0944697	1	1	1	1	1	1
GAGE10				0	0	0	0	0	1	0	0	0.242506	0.112688	0.0273275	0.852623	0.886331	0.130134	0.0888055	1	1	1	1	1	1
GAGE12C				0	0	0	0	0	0	0	0	0.241913	0.112762	0.0272785	0.855266	0.888171	0.133865	0.0915975	1	1	1	1	1	1
GAGE12D				0	0	0	0	0	0	0	0	0.2413	0.112279	0.0270929	0.860254	0.894162	0.141323	0.0999943	1	1	1	1	1	1
GAGE12E				0	0	0	0	0	0	0	0	0.241492	0.112756	0.0272298	0.858634	0.889068	0.138838	0.0929216	1	1	1	1	1	1
GAGE12F				0	0	0	0	0	0	0	0	0.241101	0.112093	0.0270258	0.861835	0.894965	0.143807	0.101241	1	1	1	1	1	1
GAGE12G				0	0	0	0	0	0	0	0	0.241559	0.112683	0.0272195	0.856972	0.889951	0.136351	0.0941622	1	1	1	1	1	1
GAGE12H				0	0	0	0	0	0	0	0	0.24135	0.112292	0.0271016	0.859449	0.893346	0.14008	0.0984032	1	1	1	1	1	1
GAGE12I				0	0	0	0	0	0	0	0	0.239838	0.111026	0.0266283	0.864134	0.898058	0.147534	0.106773	1	1	1	1	1	1
GAGE12J				0	0	0	0	0	0	0	0	0.244618	0.114526	0.0280152	0.847977	0.880424	0.123454	0.0803117	1	1	1	1	1	1
GAGE13				0	0	0	0	0	0	0	0	0.249134	0.116582	0.0290447	0.824399	0.871512	0.0974488	0.0686595	1	1	1	1	1	1
GAGE2A				0	0	0	0	0	0	0	0	0.241552	0.110103	0.0265955	0.857808	0.898803	0.137595	0.108026	1	1	1	1	1	1
GAGE2B				0	0	0	0	0	0	0	0	0.245126	0.113064	0.0277149	0.846029	0.881451	0.120969	0.0825928	1	1	1	1	1	1
GAGE2C				0	0	0	0	0	0	0	0	0.241738	0.110392	0.026686	0.856125	0.897302	0.135109	0.105371	1	1	1	1	1	1
GAGE2D				0	0	0	0	0	0	0	0	0.241252	0.10987	0.0265064	0.861049	0.90026	0.142565	0.110731	1	1	1	1	1	1
GAGE2E				0	0	0	0	0	0	0	0	0.244257	0.111026	0.0271187	0.848932	0.892517	0.124697	0.0971085	1	1	1	1	1	1
GATA1				0	0	0	0	0	8	0	2	0.161184	0.0507894	0.00818642	0.941427	0.965034	0.471024	0.426372	1	1	1	1	1	1
GDI1	hemizygous	X-linked dominant		0	0	0	0	1	2	0	3	0.252104	0.0235107	0.00592713	0.817567	0.969243	0.0925801	0.495175	1	1	1	1	1	1
GDPD2				0	0	0	0	0	4	0	7	0.082117	0.0230036	0.00188899	0.956049	0.976432	0.685487	0.673597	1	1	1	1	1	1
GEMIN8				0	0	0	0	0	4	0	4	0.169725	0.0502906	0.00853557	0.938717	0.964414	0.443052	0.415889	1	1	1	1	1	1
GJB1				0	0	0	0	0	0	0	2	0.187677	0.0475099	0.00891653	0.928425	0.963395	0.359168	0.405153	1	1	1	1	1	1
GK	hemizygous	X-linked recessive		0	0	0	0	1	4	0	6	0.212178	0.0373272	0.00792	0.905885	0.965883	0.249053	0.437061	1	1	1	1	1	1
GLA				0	0	0	0	0	3	0	3	0.126275	0.0430688	0.00543851	0.949979	0.970031	0.5806	0.510484	1	1	1	1	1	1
GLOD5				0	0	0	0	0	3	0	1	0.219305	0.081281	0.0178253	0.891732	0.942111	0.205808	0.224775	1	1	1	1	1	1
GLRA2				0	1	0	0	0	1	0	3	0.128208	0.0372099	0.00477062	0.949552	0.971375	0.57441	0.538074	1	0.143229	1	0.112909	1	1
GLRA4				0	0	0	0	2	4	2	7	0.0123802	0.0346853	0.000429413	0.964489	0.980178	0.897391	0.821964	1	1	1	1	1	1
GLUD2				1	0	0	0	0	6	0	11	0.150172	0.0192274	0.00288741	0.944949	0.973978	0.511933	0.605989	0.0171389	0.196437	0.0133511	0.157119	1	1
GNG5P2				0	0	0	0	0	1	0	1	0.265467	0.105905	0.0281142	0.774844	0.879379	0.0621808	0.0789629	1	1	1	1	1	1
GNL3L				0	0	0	0	0	7	0	6	0.104509	0.0179841	0.0018795	0.953601	0.976471	0.637993	0.674357	1	1	1	1	1	1
GPC3	hemizygous	X-linked recessive		0	0	0	0	2	6	0	11	0.430338	0.0256109	0.0110213	0.617094	0.958777	0.0225047	0.346834	1	1	1	1	1	1
GPC4	hemizygous	X-linked recessive		0	0	0	0	0	5	1	8	0.0159881	0.0188373	0.000301172	0.963528	0.980483	0.868403	0.843171	1	1	1	1	1	1
GPKOW				0	0	0	0	0	6	0	1	0.122186	0.0303738	0.00371127	0.950812	0.973232	0.592625	0.577975	1	1	1	1	1	1
GPM6B				0	0	0	0	0	7	0	9	0.153873	0.0437483	0.00673169	0.943137	0.967761	0.490306	0.471815	1	1	1	1	1	1
GPR101				0	0	0	0	0	8	0	8	0.147459	0.0174118	0.00256754	0.945559	0.974452	0.519365	0.625783	1	1	1	1	1	1
GPR112				0	0	0	0	11	36	5	53	0.000984285	8.58121e-05	8.44636e-08	0.966497	0.982602	0.975481	0.99335	1	1	1	1	1	1
GPR119				0	0	0	0	0	4	0	5	0.174081	0.0427001	0.00743327	0.937528	0.966848	0.431179	0.453237	1	1	1	1	1	1
GPR143				0	1	0	0	0	2	0	4	0.140757	0.0342882	0.00482631	0.947586	0.971258	0.546428	0.535975	1	0.150556	1	0.12026	1	1
GPR173				0	0	0	1	0	2	0	7	0.173478	1.58872	0.275609	0.937796	0.657603	0.434225	0.00947488	1	0.150506	1	1	1	0.0367755
GPR174				0	1	0	0	0	4	0	6	0.155103	0.0505436	0.00783945	0.942915	0.966047	0.487828	0.440264	1	0.0979665	1	0.0763618	1	1
GPR34				0	0	0	0	1	3	1	6	0.0482486	0.0445344	0.00214872	0.959182	0.97561	0.752219	0.653777	1	1	1	1	1	1
GPR50				0	0	0	0	1	11	0	11	0.277787	0.0129244	0.00359023	0.758046	0.973334	0.0541465	0.581863	1	1	1	1	1	1
GPR64				0	0	0	0	0	8	0	10	0.0498933	0.00876436	0.000437283	0.959063	0.98015	0.749223	0.821215	1	1	1	1	1	1
GPR82				0	0	0	0	2	3	0	4	0.779087	0.05281	0.0411436	0.408491	0.803545	0.00725199	0.0264711	1	1	1	1	1	1
GPRASP1				0	2	0	0	0	10	3	19	0.000125772	0.00517655	6.51064e-07	0.966957	0.982515	0.991141	0.984165	1	0.0605229	1	0.038105	1	1
GPRASP2				0	0	0	0	0	10	0	12	0.0841481	0.0124673	0.0010491	0.955645	0.978365	0.677524	0.752592	1	1	1	1	1	1
GRIA3	hemizygous	X-linked recessive		0	0	0	1	1	7	1	6	0.0170983	0.417303	0.00713518	0.96328	0.967462	0.862119	0.461898	1	0.260494	1	1	1	0.0647843
GRIPAP1				0	0	0	0	0	11	0	13	0.0512204	0.0072897	0.000373381	0.958943	0.980373	0.746502	0.831139	1	1	1	1	1	1
GRPR				0	0	0	0	0	6	0	11	0.165314	0.0399218	0.00659962	0.940714	0.968199	0.462776	0.479029	1	1	1	1	1	1
GSPT2	hemizygous			0	1	0	0	0	7	0	6	0.113692	0.0143025	0.00162609	0.952322	0.976937	0.616962	0.695516	1	0.208696	1	0.164996	1	1
GUCY2F				0	1	0	0	2	19	9	14	4.85015e-08	0.00746295	3.61964e-10	0.967121	0.982667	0.999497	0.998167	1	0.303521	1	0.244671	1	1
GYG2				0	0	0	0	2	4	2	3	0.0120598	0.024188	0.000291702	0.964536	0.98051	0.899212	0.845357	1	1	1	1	1	1
H2AFB1				0	0	0	0	0	0	0	0	0.262225	0.135438	0.0355152	0.781319	0.816686	0.0677194	0.0345985	1	1	1	1	1	1
H2AFB2				0	0	0	0	0	0	0	0	0.262225	0.135438	0.0355152	0.783391	0.819106	0.0677194	0.0345985	1	1	1	1	1	1
H2AFB3				0	0	0	0	0	0	0	0	0.262225	0.135438	0.0355152	0.785421	0.821461	0.0677194	0.0345985	1	1	1	1	1	1
H2BFM				0	1	0	0	0	4	0	6	0.179592	0.0433567	0.00778651	0.934394	0.966292	0.403868	0.441815	1	0.109805	1	0.0860398	1	1
H2BFWT				0	0	0	0	0	2	0	4	0.219012	0.05714	0.0125144	0.892189	0.955793	0.20705	0.315429	1	1	1	1	1	1
HAUS7				0	0	0	0	0	5	1	0	0.018468	0.0378648	0.000699288	0.962827	0.979172	0.850039	0.787295	1	1	1	1	1	1
HCCS	X-linked dominant	X-linked dominant		0	0	0	0	0	1	0	2	0.163047	0.0606555	0.00988967	0.941191	0.961276	0.468544	0.375124	1	1	1	1	1	1
HCFC1	hemizygous	X-linked recessive		0	0	0	3	0	22	0	10	0.0124743	26.5788	0.331551	0.964301	0.630355	0.894994	0.00837736	1	0.0546779	1	1	1	0.000981577
HDAC6				0	0	0	1	0	10	0	13	0.0333069	0.0964371	0.00321203	0.960404	0.973684	0.782679	0.592926	1	0.365538	1	1	1	0.0972437
HDHD1				0	0	0	0	0	1	0	2	0.194446	0.0594806	0.0115657	0.923292	0.957658	0.330135	0.335062	1	1	1	1	1	1
HDX				0	0	0	0	0	13	1	6	0.0126665	0.0377807	0.000478549	0.964253	0.979863	0.892421	0.814327	1	1	1	1	1	1
HEPH				0	0	0	1	0	13	0	7	0.0315498	0.4266	0.0134591	0.960631	0.953137	0.790898	0.295714	1	0.305912	1	1	1	0.0762054
HMGB3		X-linked	hemizygous	0	0	0	0	0	1	0	1	0.212551	0.0837789	0.0178073	0.904864	0.942349	0.246002	0.225891	1	1	1	1	1	1
HMGN5				0	0	0	0	0	1	0	2	0.191142	0.0869549	0.0166208	0.926544	0.946324	0.347872	0.244951	1	1	1	1	1	1
HPRT1	hemizygous	X-linked recessive		0	0	0	0	0	1	0	1	0.188226	0.0791992	0.0149074	0.928058	0.949783	0.357676	0.268575	1	1	1	1	1	1
HS6ST2				0	0	0	0	0	12	1	6	0.0146624	0.0101951	0.000149485	0.963675	0.981143	0.874655	0.882308	1	1	1	1	1	1
HSD17B10	hemizygous	X-linked dominant		0	1	0	0	0	0	0	0	0.173999	0.0571302	0.00994061	0.937662	0.961062	0.432418	0.373024	1	0.0967389	1	0.075999	1	1
HSFX1				0	0	0	0	0	0	0	0	0.152214	0.0310156	0.004721	0.944112	0.971607	0.501462	0.541394	1	1	1	1	1	1
HSFX2				0	0	0	0	0	0	0	0	0.152216	0.031018	0.00472143	0.944006	0.971549	0.500223	0.540192	1	1	1	1	1	1
HTATSF1				0	0	0	0	0	7	0	12	0.0833656	0.0172579	0.00143872	0.955847	0.977602	0.681223	0.713603	1	1	1	1	1	1
HTR2C				0	0	0	0	0	4	0	7	0.139536	0.025913	0.0036158	0.947771	0.973283	0.549165	0.581394	1	1	1	1	1	1
IDH3G				0	0	0	0	0	1	1	5	0.0218652	0.0278077	0.000608021	0.962622	0.979448	0.840028	0.796863	1	1	1	1	1	1
IDS	hemizygous	X-linked recessive		0	0	0	0	0	7	0	10	0.114021	0.0191176	0.00217982	0.952167	0.975439	0.614487	0.65236	1	1	1	1	1	1
IGBP1		X-linked recessive	hemizygous	0	0	0	1	0	5	0	6	0.149084	1.79797	0.268049	0.945357	0.665815	0.516888	0.00965249	1	0.115389	1	1	1	0.0274969
IGSF1	hemizygous	X-linked recessive		0	1	0	0	0	15	2	18	0.000561755	0.00328124	1.84326e-06	0.966581	0.982493	0.981655	0.977509	1	0.343208	1	0.279121	1	1
IKBKG	hemizygous; X-linked dominant	X-linked recessive; X-linked dominant		0	0	0	0	0	2	0	3	0.128051	0.0380887	0.0048773	0.949724	0.971199	0.576888	0.534582	1	1	1	1	1	1
IL13RA1				0	0	0	0	0	8	0	8	0.136612	0.0392061	0.00535604	0.948227	0.970158	0.55468	0.514291	1	1	1	1	1	1
IL13RA2				0	0	0	0	1	6	0	4	0.280813	0.0484944	0.0136179	0.75543	0.952503	0.0527724	0.29165	1	1	1	1	1	1
IL1RAPL1	hemizygous	X-linked recessive		0	1	1	0	0	6	0	7	13.3367	0.0161635	0.215568	0.281734	0.701665	0.00245398	0.011101	0.0334299	0.0227964	1	0.162926	0.00767075	0.0511975
IL1RAPL2				1	0	0	0	0	12	2	12	0.00207694	0.0190643	3.95954e-05	0.966326	0.981807	0.964577	0.930872	0.0299445	0.182114	0.0232866	0.143843	1	1
IL2RG				0	0	0	0	0	5	0	8	0.145501	0.0477352	0.00694554	0.946253	0.967612	0.527375	0.467019	1	1	1	1	1	1
IRAK1				0	0	0	0	1	5	0	14	0.179344	0.0173808	0.00311715	0.934544	0.973832	0.404434	0.597863	1	1	1	1	1	1
IRS4				0	0	0	0	0	12	0	10	0.0437755	0.00108733	4.75983e-05	0.95942	0.981784	0.758412	0.924981	1	1	1	1	1	1
ITGB1BP2				0	0	0	0	0	5	0	2	0.141959	0.0576544	0.00818457	0.947212	0.965121	0.540001	0.426554	1	1	1	1	1	1
ITIH6				0	0	0	0	2	21	1	19	0.0242719	0.00285538	6.93056e-05	0.962049	0.981615	0.827278	0.915186	1	1	1	1	1	1
ITM2A				0	0	0	0	0	6	0	5	0.182643	0.0509272	0.00930149	0.931884	0.962912	0.383453	0.394727	1	1	1	1	1	1
KAL1				0	1	0	0	0	5	0	7	0.0619728	0.0202624	0.00125572	0.958215	0.977921	0.726457	0.729671	1	0.205303	1	0.164991	1	1
KCND1				0	0	0	0	0	5	0	6	0.102211	0.00957706	0.000978886	0.954036	0.978498	0.644953	0.759754	1	1	1	1	1	1
KCNE1L				0	0	0	0	0	2	0	2	0.233206	0.0560027	0.0130601	0.876355	0.954057	0.170038	0.302981	1	1	1	1	1	1
KIAA1210				0	0	0	0	2	21	5	21	8.84733e-06	0.00186379	1.64896e-08	0.96708	0.982624	0.99684	0.996031	1	1	1	1	1	1
KIF4A		X-linked recessive	hemizygous	0	0	0	0	0	9	0	7	0.022141	0.00453576	0.000100426	0.962467	0.981469	0.838306	0.899728	1	1	1	1	1	1
KLF8			X-linked dominant	0	0	0	0	0	7	0	12	0.171207	0.0419783	0.00718698	0.938326	0.967311	0.43933	0.461135	1	1	1	1	1	1
KLHL13				0	0	0	0	0	8	0	9	0.0892292	0.016372	0.00146086	0.955164	0.977494	0.667762	0.711312	1	1	1	1	1	1
KLHL15		X-linked recessive	hemizygous	0	0	1	0	2	4	0	2	79.0945	0.0201304	1.5922	0.0784562	0.417731	6.54229e-05	0.00128632	0.0248801	0.189751	1	1	0.00569633	0.0471663
KLHL34				0	0	0	0	0	3	0	2	0.116879	0.00405815	0.000474312	0.951538	0.979921	0.605018	0.815226	1	1	1	1	1	1
KLHL4				0	0	0	0	0	11	1	11	0.012452	0.0151801	0.000189023	0.964348	0.980937	0.895662	0.869991	1	1	1	1	1	1
KRBOX4				0	0	0	0	0	2	1	2	0.0315393	0.080738	0.00254642	0.960687	0.974683	0.791566	0.628118	1	1	1	1	1	1
L1CAM	hemizygous	X-linked recessive		0	0	0	1	0	12	0	8	0.0254967	0.0700737	0.00178665	0.961837	0.976629	0.820855	0.681738	1	0.406606	1	1	1	0.111468
LAGE3		X-linked recessive	hemizygous	0	0	0	0	0	0	0	0	0.225745	0.0698837	0.0157759	0.885384	0.947918	0.189636	0.255901	1	1	1	1	1	1
LAMP2	hemizygous	X-linked dominant		0	0	0	0	0	7	0	6	0.150934	0.0429216	0.00647833	0.944534	0.96827	0.506979	0.48099	1	1	1	1	1	1
LANCL3				0	0	0	0	0	7	0	5	0.149411	0.0272684	0.0040742	0.945255	0.972764	0.515649	0.565257	1	1	1	1	1	1
LAS1L		X-linked recessive	hemizygous	0	2	0	1	0	4	0	6	0.0748537	0.636165	0.0476193	0.95747	0.788379	0.711872	0.0237667	1	0.00231537	1	0.0174341	1	0.0551528
LCA10				0	0	0	0	1	5	0	8	0.450234	0.0727317	0.0327463	0.588269	0.852202	0.0187555	0.0562184	1	1	1	1	1	1
LDOC1				0	0	0	0	0	4	0	2	0.230031	0.0609441	0.014019	0.88049	0.951518	0.178879	0.285082	1	1	1	1	1	1
LHFPL1				0	0	0	0	1	3	0	7	0.432983	0.0764248	0.0330907	0.610287	0.850597	0.0222585	0.0557724	1	1	1	1	1	1
LINC00632				0	0	0	0	0	1	0	2	0.248012	0.0979269	0.0242871	0.830706	0.911124	0.102984	0.129839	1	1	1	1	1	1
LONRF3				0	0	0	0	0	6	0	7	0.0645298	0.00699284	0.000451247	0.95803	0.980036	0.723506	0.818572	1	1	1	1	1	1
LPAR4				0	1	0	0	0	4	0	7	0.184893	0.0478853	0.00885365	0.931054	0.96349	0.377206	0.406746	1	0.102183	1	0.0796927	1	1
LRCH2				0	0	0	0	1	7	0	12	0.124077	0.0201904	0.00250518	0.950315	0.974865	0.584862	0.631266	1	1	1	1	1	1
LUZP4				0	0	0	0	1	6	0	4	0.351999	0.0589148	0.020738	0.700021	0.926983	0.0377682	0.177737	1	1	1	1	1	1
MAGEA1				0	0	0	0	0	3	0	7	0.178918	0.0582559	0.010423	0.934694	0.960179	0.405673	0.359614	1	1	1	1	1	1
MAGEA10				0	0	0	1	0	4	0	5	0.175716	2.03935	0.358346	0.936567	0.598311	0.423601	0.00781294	1	0.102138	1	1	1	0.0244264
MAGEA11				0	0	0	0	0	1	0	3	0.151883	0.0504353	0.00766027	0.944324	0.966532	0.504501	0.44686	1	1	1	1	1	1
MAGEA12				0	0	0	0	1	6	0	5	0.383787	0.0470564	0.0180596	0.668782	0.940638	0.0317654	0.222554	1	1	1	1	1	1
MAGEA2				0	0	0	0	0	0	0	0	0.178802	0.0531783	0.00950841	0.93499	0.961906	0.408154	0.38697	1	1	1	1	1	1
MAGEA2B				0	0	0	0	0	0	0	0	0.178806	0.0531828	0.00950939	0.934842	0.961803	0.406912	0.385751	1	1	1	1	1	1
MAGEA3				0	0	0	0	0	10	0	5	0.177797	0.0645939	0.0114846	0.935573	0.957786	0.413113	0.336845	1	1	1	1	1	1
MAGEA4				0	0	0	0	0	3	0	7	0.1797	0.0549388	0.00987247	0.934244	0.961383	0.402628	0.375573	1	1	1	1	1	1
MAGEA6				0	0	0	0	0	10	0	9	0.17805	0.0456839	0.00813402	0.935283	0.965293	0.410634	0.428769	1	1	1	1	1	1
MAGEA8				0	0	0	0	0	4	0	5	0.19124	0.0454053	0.00868331	0.92635	0.96405	0.346633	0.412084	1	1	1	1	1	1
MAGEA9				0	0	0	0	0	0	0	0	0.181167	0.0521237	0.00944311	0.932691	0.962315	0.390221	0.390973	1	1	1	1	1	1
MAGEA9B				0	0	0	0	0	0	0	0	0.181168	0.0521247	0.00944333	0.932531	0.962214	0.388981	0.389765	1	1	1	1	1	1
MAGEB1				0	0	0	0	0	5	1	8	0.0259509	0.0371201	0.000963301	0.961515	0.978531	0.814678	0.761711	1	1	1	1	1	1
MAGEB10				0	0	0	0	0	2	0	7	0.174686	0.0597804	0.0104428	0.936845	0.960066	0.426087	0.359183	1	1	1	1	1	1
MAGEB16				0	0	0	0	0	4	0	8	0.168433	0.0560063	0.00943334	0.939357	0.962516	0.448578	0.392313	1	1	1	1	1	1
MAGEB17				0	0	0	0	2	4	0	2	0.74769	0.0393897	0.0294513	0.453366	0.869071	0.00857786	0.0664122	1	1	1	1	1	1
MAGEB18				0	0	0	0	0	5	0	5	0.183194	0.0426638	0.00781576	0.931554	0.966129	0.380973	0.440583	1	1	1	1	1	1
MAGEB2				0	0	0	0	0	4	0	12	0.185829	0.0767729	0.0142666	0.930546	0.95101	0.372379	0.281005	1	1	1	1	1	1
MAGEB3				0	0	0	0	1	8	0	9	0.379685	0.0442661	0.0168072	0.673651	0.9457	0.0323575	0.24265	1	1	1	1	1	1
MAGEB4				1	0	0	0	0	2	0	1	0.180706	0.0445812	0.00805611	0.933008	0.965716	0.392704	0.433375	0.0121592	0.110583	0.00942256	0.0863261	1	1
MAGEB5				0	0	0	0	0	3	0	5	0.192468	0.0644816	0.0124106	0.92576	0.956069	0.343572	0.31736	1	1	1	1	1	1
MAGEB6				0	0	0	1	0	6	0	7	0.162627	1.29341	0.210344	0.941309	0.707913	0.469785	0.0112744	1	0.138537	1	1	1	0.033665
MAGEC1				0	1	0	0	6	31	2	34	0.10404	0.00526011	0.00054726	0.953674	0.979628	0.638092	0.803466	1	0.268424	1	0.214028	1	1
MAGEC2				0	0	0	0	0	5	0	7	0.180963	0.0431233	0.00780372	0.93285	0.966211	0.391462	0.441056	1	1	1	1	1	1
MAGEC3				1	1	0	0	3	13	1	13	0.122622	0.0206386	0.00253073	0.950647	0.974775	0.588913	0.629548	0.027636	0.0161304	0.0215292	0.00997235	1	1
MAGED1				0	1	0	0	3	13	0	16	0.563709	0.00818395	0.00461336	0.514679	0.971835	0.0118336	0.546318	1	0.254901	1	0.203971	1	1
MAGED2				0	1	0	0	1	5	0	13	0.193492	0.0330113	0.00638741	0.924343	0.968695	0.336231	0.483914	1	0.188505	1	0.150532	1	1
MAGED4				0	0	0	0	0	0	0	0	0.0816259	0.00974848	0.000795728	0.95638	0.979015	0.691656	0.776219	1	1	1	1	1	1
MAGED4B				0	0	0	0	0	0	0	0	0.0817097	0.0097766	0.000798843	0.956314	0.978952	0.690423	0.774486	1	1	1	1	1	1
MAGEE1				0	1	0	0	0	9	0	14	0.0781574	0.00405778	0.000317145	0.956963	0.980428	0.701435	0.839927	1	0.311946	1	0.250252	1	1
MAGEE2				0	0	0	0	0	9	0	9	0.116773	0.0237503	0.0027734	0.951618	0.974265	0.606256	0.613297	1	1	1	1	1	1
MAGEH1				0	0	0	0	0	2	0	2	0.193597	0.0490146	0.00948908	0.924135	0.962112	0.33567	0.387957	1	1	1	1	1	1
MAGIX				2	0	0	0	1	5	0	5	0.336239	0.0224216	0.007539	0.715283	0.966691	0.0412443	0.449976	0.00011528	0.0151685	6.99309e-05	0.00940675	1	1
MAGT1		X-linked recessive	hemizygous	0	0	0	0	0	5	0	5	0.140643	0.0367464	0.00516812	0.947678	0.97041	0.547668	0.520763	1	1	1	1	1	1
MAMLD1	hemizygous	X-linked recessive		0	0	0	0	0	6	0	14	0.0646834	0.0100764	0.000651773	0.957968	0.979387	0.722272	0.792987	1	1	1	1	1	1
MAOA	hemizygous	X-linked recessive		0	0	0	0	1	8	0	6	0.215453	0.0231838	0.00499503	0.895698	0.970961	0.216204	0.528555	1	1	1	1	1	1
MAOB				1	0	0	0	0	6	1	7	0.0157191	0.0288034	0.000452764	0.963577	0.980007	0.869083	0.818138	0.0260931	0.15425	0.0203364	0.122177	1	1
MAP3K15				0	0	0	0	0	26	1	23	0.00348892	0.00246904	8.61427e-06	0.965981	0.98218	0.949193	0.958211	1	1	1	1	1	1
MAP7D2				0	0	0	0	1	10	0	11	0.119916	0.0114749	0.00137602	0.951056	0.977674	0.59704	0.718289	1	1	1	1	1	1
MAP7D3				0	0	0	0	0	13	1	17	0.00947526	0.00806613	7.64287e-05	0.964953	0.981567	0.909386	0.910626	1	1	1	1	1	1
MBNL3				0	0	0	0	0	5	1	4	0.0225372	0.0417917	0.000941869	0.962364	0.978597	0.836406	0.763531	1	1	1	1	1	1
MBTPS2				0	0	0	1	0	1	0	3	0.115742	1.52745	0.176791	0.951776	0.735592	0.608988	0.0124189	1	0.151372	1	1	1	0.0363054
MCF2				0	1	0	0	1	17	0	17	0.0799937	0.00847512	0.000677956	0.956899	0.979296	0.699634	0.790411	1	0.268999	1	0.217097	1	1
MCTS1				0	0	0	0	0	0	0	1	0.208413	0.0978461	0.0203924	0.90974	0.928847	0.264015	0.182007	1	1	1	1	1	1
MED14				0	1	0	2	0	13	0	10	0.0173789	4.57655	0.0795354	0.963231	0.766833	0.861049	0.0176913	1	0.0133258	1	0.314872	1	0.00538395
MID1	hemizygous	X-linked recessive		0	0	1	0	0	7	0	8	15.8681	0.0115346	0.183033	0.230552	0.725177	0.00212214	0.01224	0.0292266	0.228846	1	1	0.00666587	0.0572548
MID1IP1				0	0	0	0	0	1	0	1	0.228165	0.0546204	0.0124624	0.88272	0.955932	0.183176	0.316466	1	1	1	1	1	1
MID2				0	0	0	1	0	6	0	4	0.0771747	0.661987	0.0510886	0.957155	0.78506	0.706369	0.022142	1	0.219369	1	1	1	0.0544803
MMGT1				0	1	0	0	0	0	0	0	0.182514	0.0583741	0.0106541	0.932047	0.959606	0.384695	0.355134	1	0.092209	1	0.0720834	1	1
MORC4				0	0	0	0	1	14	0	15	0.104817	0.00844647	0.000885331	0.953527	0.978824	0.636755	0.768208	1	1	1	1	1	1
MORF4L2				0	0	0	0	1	1	0	2	0.407153	0.0611795	0.0249094	0.653233	0.909383	0.0280478	0.12466	1	1	1	1	1	1
MOSPD1				0	0	0	0	0	2	0	1	0.191056	0.073742	0.0140889	0.926737	0.95135	0.349113	0.284208	1	1	1	1	1	1
MOSPD2				0	0	0	0	0	4	1	2	0.0177683	0.0388954	0.000691106	0.96303	0.979234	0.85723	0.788256	1	1	1	1	1	1
MPP1				0	0	0	0	0	2	0	4	0.121894	0.0333092	0.0040602	0.950893	0.972817	0.59499	0.565726	1	1	1	1	1	1
MSN				0	0	0	0	0	2	0	5	0.0967987	0.0245691	0.00237826	0.954605	0.975045	0.65581	0.638921	1	1	1	1	1	1
MST4				0	0	0	0	0	4	0	4	0.117864	0.0397956	0.00469047	0.951298	0.971778	0.601305	0.542402	1	1	1	1	1	1
MTCP1				0	0	0	0	0	0	0	0	0.226104	0.0917621	0.0207477	0.884335	0.926598	0.18715	0.177653	1	1	1	1	1	1
MTM1	hemizygous	X-linked recessive		0	0	0	0	1	3	0	7	0.168904	0.0265691	0.00448763	0.939103	0.972115	0.446097	0.553026	1	1	1	1	1	1
MTMR1				0	0	0	0	0	4	0	7	0.0726679	0.0202133	0.00146886	0.957595	0.977385	0.714942	0.710244	1	1	1	1	1	1
MTMR8				0	0	0	0	0	19	1	22	0.0135735	0.0146537	0.000198902	0.964014	0.980858	0.885429	0.865905	1	1	1	1	1	1
MTRNR2L10				0	0	0	0	0	0	0	0	0.275463	0.128069	0.0352782	0.760604	0.823756	0.0554047	0.0365187	1	1	1	1	1	1
MUM1L1				0	0	0	0	1	10	1	11	0.0295169	0.0195906	0.000578254	0.961132	0.979508	0.802508	0.79897	1	1	1	1	1	1
MXRA5				0	2	0	0	0	41	0	37	0.00583051	4.58125e-05	2.6711e-07	0.965451	0.982537	0.928221	0.987634	1	0.260599	1	0.181014	1	1
NAP1L2				0	0	0	0	0	8	0	13	0.153004	0.0319377	0.00488658	0.943575	0.97114	0.495265	0.534166	1	1	1	1	1	1
NAP1L3				0	0	0	0	0	8	0	8	0.144177	0.0283138	0.00408219	0.946737	0.972711	0.533809	0.565068	1	1	1	1	1	1
NAP1L6				0	0	0	0	0	3	0	7	0.245333	0.1018	0.0249749	0.845035	0.906953	0.119726	0.123058	1	1	1	1	1	1
NCBP2L				0	0	0	0	1	3	1	8	0.0714004	0.0963268	0.00687777	0.95772	0.967687	0.71734	0.468016	1	1	1	1	1	1
NDP	hemizygous	X-linked recessive; X-linked dominant		0	0	0	0	0	3	0	3	0.220573	0.0767117	0.0169205	0.890805	0.945489	0.203325	0.242186	1	1	1	1	1	1
NDUFA1	hemizygous	X-linked recessive		0	0	0	0	0	2	0	4	0.255429	0.101876	0.0260222	0.796811	0.902368	0.0765731	0.113381	1	1	1	1	1	1
NDUFB11	X-linked dominant	X-linked dominant; X-linked		1	0	0	0	0	1	0	2	0.208365	0.0705918	0.0147088	0.910046	0.950316	0.265256	0.272559	0.00861033	0.0714699	0.00668886	0.0562042	1	1
NGFRAP1				0	0	0	0	0	1	0	0	0.227377	0.0908459	0.0206562	0.883264	0.927363	0.184419	0.178616	1	1	1	1	1	1
NHS	hemizygous	X-linked dominant; X-linked		0	0	0	0	1	16	0	19	0.0538966	0.000614247	3.31058e-05	0.958702	0.981855	0.73995	0.937061	1	1	1	1	1	1
NHSL2				0	0	0	0	0	7	0	8	0.0501138	0.00255374	0.000127978	0.959003	0.981244	0.747988	0.890016	1	1	1	1	1	1
NKAP	hemizygous			0	0	0	1	0	4	0	5	0.106705	1.21914	0.130088	0.952932	0.740546	0.627096	0.0139226	1	0.15932	1	1	1	0.0385397
NKRF				0	0	0	0	0	9	0	8	0.0982974	0.0149152	0.00146612	0.954464	0.977458	0.653333	0.710613	1	1	1	1	1	1
NLGN3	hemizygous	X-linked		0	0	0	0	3	6	0	10	0.640946	0.00589582	0.0037789	0.479691	0.973078	0.00998184	0.576201	1	1	1	1	1	1
NLGN4X		X-linked	hemizygous	0	1	0	0	2	14	0	14	0.334025	0.00495241	0.00165423	0.718849	0.976899	0.0414948	0.693618	1	0.290131	1	0.232558	1	1
NONO	hemizygous	X-linked		0	1	1	1	4	0	0	4	295.16	1.65203	487.613	0.0164887	0.0109814	2.26368e-05	2.73632e-06	0.028094	0.000914559	1	0.134028	0.00631309	0.000808993
NOX1				0	0	0	0	3	8	3	3	0.00291851	0.0346261	0.000101057	0.966024	0.981395	0.955261	0.898884	1	1	1	1	1	1
NR0B1				0	0	0	0	0	2	0	4	0.146538	0.0147862	0.00216674	0.945659	0.975525	0.520607	0.653038	1	1	1	1	1	1
NRK				0	1	0	1	0	25	2	31	0.000275951	0.062007	1.71109e-05	0.966791	0.982019	0.986484	0.949562	1	0.0908281	1	0.322311	1	0.10684
NSDHL	hemizygous; X-linked dominant	X-linked recessive; X-linked dominant		0	0	0	0	0	4	0	7	0.154114	0.0404652	0.00623625	0.943026	0.96904	0.489066	0.487619	1	1	1	1	1	1
NUDT11				0	0	0	0	0	0	0	2	0.209587	0.0644263	0.0135029	0.907535	0.95298	0.255324	0.293584	1	1	1	1	1	1
NUP62CL				0	0	0	0	0	3	1	3	0.0311049	0.0793863	0.0024693	0.960799	0.974955	0.792931	0.63346	1	1	1	1	1	1
NXF2				0	0	0	0	0	0	0	0	0.0895969	0.0319775	0.00286508	0.954956	0.974026	0.664052	0.608473	1	1	1	1	1	1
NXF2B				0	0	0	0	0	0	0	0	0.0895682	0.0308988	0.00276755	0.955026	0.974312	0.665288	0.614944	1	1	1	1	1	1
NXF3				0	0	0	0	0	7	2	11	0.0023434	0.028807	6.75063e-05	0.966154	0.98164	0.96043	0.915587	1	1	1	1	1	1
NXF5				0	0	0	0	1	3	0	1	0.29856	0.0658462	0.0196591	0.74436	0.932626	0.0502316	0.192659	1	1	1	1	1	1
NXT2				0	0	0	0	0	3	0	4	0.206843	0.0716612	0.0148226	0.911245	0.949962	0.270222	0.270595	1	1	1	1	1	1
NYX	hemizygous	X-linked recessive		0	0	0	0	0	3	0	1	0.152657	0.00765351	0.00116836	0.943899	0.978025	0.498983	0.737455	1	1	1	1	1	1
OCRL	hemizygous	X-linked recessive		0	0	0	0	0	7	0	17	0.0422543	0.016335	0.000690222	0.959596	0.979265	0.762513	0.788477	1	1	1	1	1	1
OFD1	hemizygous; X-linked dominant	X-linked recessive; X-linked dominant		2	0	1	1	1	19	0	21	17.4723	0.428198	7.48161	0.216263	0.183665	0.0020301	0.000227612	1.76095e-05	0.000224341	0.000684849	0.0218964	0.0103158	0.001807
OGT	hemizygous; X-linked dominant	X-linked recessive		0	2	0	0	0	7	0	4	0.0381686	0.00680497	0.000259737	0.960118	0.980592	0.774154	0.85237	1	0.0507807	1	0.0320953	1	1
OPHN1	hemizygous	X-linked recessive		0	0	1	0	3	17	0	7	103.435	0.0392489	4.05973	0.0318993	0.34047	4.15423e-05	0.000465423	0.0363383	0.225886	1	1	0.00825915	0.0557135
OPN1LW				0	0	0	0	0	2	0	3	0.166648	0.0549312	0.0091542	0.940228	0.963106	0.457816	0.398483	1	1	1	1	1	1
OPN1MW				0	0	0	0	0	0	0	2	0.167417	0.0641399	0.0107381	0.939734	0.95949	0.452295	0.352124	1	1	1	1	1	1
OPN1MW2				0	0	0	0	0	0	0	1	0.167028	0.0599879	0.0100197	0.940105	0.960845	0.456014	0.369171	1	1	1	1	1	1
OR13H1				0	0	0	0	0	9	0	9	0.186656	0.0470651	0.00878495	0.929327	0.963678	0.363694	0.409351	1	1	1	1	1	1
OTC	hemizygous	X-linked recessive		0	1	0	0	0	2	0	0	0.138184	0.0523902	0.0072395	0.947863	0.967158	0.550402	0.459592	1	0.107543	1	0.0843779	1	1
OTUD5				0	0	0	0	0	3	0	3	0.109281	0.0133051	0.001454	0.952705	0.97753	0.623123	0.711947	1	1	1	1	1	1
OTUD6A				0	0	0	0	0	4	0	2	0.196113	0.0299512	0.00587384	0.921988	0.96931	0.322814	0.496324	1	1	1	1	1	1
P2RY10				0	1	0	0	0	3	0	4	0.182411	0.0449704	0.00820309	0.932209	0.964947	0.385936	0.425989	1	0.106002	1	0.082704	1	1
P2RY4				0	0	0	0	0	6	0	4	0.166525	0.0317616	0.00528912	0.94035	0.970221	0.459056	0.516843	1	1	1	1	1	1
PABPC1L2A				0	0	0	0	0	0	0	0	0.20353	0.0555531	0.0113067	0.915443	0.958038	0.289971	0.339609	1	1	1	1	1	1
PABPC1L2B				0	0	0	0	0	0	0	0	0.203529	0.0555514	0.0113063	0.915707	0.958163	0.291212	0.340832	1	1	1	1	1	1
PABPC5				0	0	0	0	0	3	0	7	0.165317	0.0380574	0.00629154	0.940593	0.968833	0.461537	0.486479	1	1	1	1	1	1
PAGE1				0	0	0	0	0	4	0	1	0.214419	0.0908835	0.0194871	0.897768	0.93295	0.222412	0.193699	1	1	1	1	1	1
PAGE2				0	0	0	0	0	2	0	1	0.239188	0.0979824	0.0234362	0.867073	0.914933	0.152759	0.141451	1	1	1	1	1	1
PAGE2B				0	0	0	0	0	2	0	2	0.238582	0.0945326	0.0225538	0.867786	0.919837	0.154002	0.153236	1	1	1	1	1	1
PAGE3				0	0	0	0	0	4	1	3	0.0349605	0.0904639	0.00316266	0.960176	0.973783	0.777315	0.595421	1	1	1	1	1	1
PAGE4				0	0	0	0	0	1	0	1	0.230407	0.093097	0.0214502	0.87934	0.924612	0.176394	0.169753	1	1	1	1	1	1
PAGE5				0	0	0	0	1	1	0	2	0.476272	0.0967048	0.0460578	0.563483	0.794718	0.0154045	0.0243682	1	1	1	1	1	1
PAK3	hemizygous	X-linked recessive		0	1	0	1	1	8	0	2	0.197443	1.91476	0.378056	0.920862	0.573622	0.316612	0.0074097	1	0.0138334	1	0.12802	1	0.0385737
PASD1				0	0	0	0	1	8	0	7	0.145755	0.0172642	0.00251634	0.946056	0.97482	0.524896	0.63037	1	1	1	1	1	1
PBDC1				0	0	0	0	0	4	1	7	0.0282511	0.0696771	0.00196846	0.961242	0.976191	0.806527	0.667131	1	1	1	1	1	1
PCDH11X				0	0	0	0	0	13	0	15	0.0411722	0.00249104	0.000102562	0.959772	0.981345	0.76559	0.897956	1	1	1	1	1	1
PCDH19	X-linked over-dominant	X-linked		1	3	0	0	0	18	3	23	0.000200052	0.000900989	1.80244e-07	0.966874	0.982581	0.987985	0.989778	0.043581	0.0021269	0.0339507	0.000836569	1	1
PCSK1N				0	0	0	0	0	0	0	0	0.206334	0.0428995	0.00885164	0.912121	0.963584	0.273944	0.408144	1	1	1	1	1	1
PCYT1B				0	0	0	0	0	3	0	5	0.150055	0.0429169	0.00643987	0.945051	0.968484	0.513171	0.48265	1	1	1	1	1	1
PDK3				0	0	0	0	0	5	0	3	0.132267	0.0359996	0.00476156	0.948942	0.971433	0.565156	0.538309	1	1	1	1	1	1
PDZD11				0	0	0	0	0	1	0	0	0.212304	0.0898017	0.0190652	0.905547	0.936602	0.248488	0.207421	1	1	1	1	1	1
PDZD4				0	2	0	0	1	10	0	12	0.174461	0.00255124	0.000445093	0.936983	0.980093	0.426642	0.819605	1	0.066476	1	0.0423803	1	1
PFKFB1				0	0	0	0	1	4	2	12	0.00428905	0.0517546	0.000221978	0.965718	0.980752	0.939961	0.860484	1	1	1	1	1	1
PGAM4				0	0	0	0	0	1	0	1	0.204529	0.0635561	0.012999	0.91354	0.954797	0.280149	0.306466	1	1	1	1	1	1
PGK1	hemizygous	X-linked recessive		0	0	0	0	0	4	0	1	0.152775	0.0586419	0.00895904	0.943791	0.963299	0.497744	0.403992	1	1	1	1	1	1
PGRMC1				0	0	0	0	1	1	0	2	0.46042	0.0541583	0.0249356	0.572084	0.908185	0.0173769	0.123526	1	1	1	1	1	1
PHEX				0	0	1	0	0	14	0	8	9.84429	0.0205344	0.202147	0.295197	0.713903	0.00268532	0.0116274	0.0409887	0.226587	1	1	0.00942632	0.0567329
PHF16				0	0	0	0	0	0	0	0	0.0721976	0.0156358	0.00112886	0.957658	0.978162	0.716175	0.74234	1	1	1	1	1	1
PHF6	hemizygous	X-linked recessive		2	1	1	0	0	4	0	1	21.0679	0.0615193	1.29608	0.188054	0.496828	0.00168483	0.00164527	1.99437e-06	4.85438e-06	0.00015945	8.91268e-05	0.00502702	0.0229855
PHKA1				0	0	0	0	0	17	1	20	0.00273004	0.00346112	9.44901e-06	0.966068	0.982157	0.956972	0.957486	1	1	1	1	1	1
PHKA2				0	0	0	0	0	19	0	12	0.0259103	0.00388382	0.000100631	0.961623	0.981444	0.816503	0.899537	1	1	1	1	1	1
PIGA	hemizygous	X-linked recessive		0	0	0	0	0	5	0	4	0.14645	0.0341998	0.00500857	0.945759	0.9709	0.521846	0.528004	1	1	1	1	1	1
PIH1D3		X-linked recessive		0	1	0	0	1	2	0	3	0.422514	0.0821226	0.0346979	0.62999	0.825992	0.0241341	0.0371988	1	0.0532041	1	0.0416993	1	1
PIM2				0	0	0	0	0	0	0	1	0.15937	0.0473419	0.0075449	0.941778	0.966612	0.474742	0.449552	1	1	1	1	1	1
PIN4				0	0	0	0	0	3	0	3	0.236591	0.0923064	0.0218389	0.869877	0.922944	0.157045	0.165166	1	1	1	1	1	1
PIR				0	0	0	0	0	3	1	1	0.0256527	0.062969	0.00161532	0.96173	0.976975	0.81841	0.696048	1	1	1	1	1	1
PJA1				0	0	0	0	0	3	0	6	0.0934841	0.0163193	0.00152559	0.954816	0.9772	0.6601	0.705414	1	1	1	1	1	1
PLAC1				0	0	0	0	0	3	0	3	0.219403	0.0716805	0.0157269	0.891271	0.948492	0.204566	0.25712	1	1	1	1	1	1
PLP1	hemizygous	X-linked recessive		1	0	0	1	2	1	0	0	0.755913	2.89365	2.18735	0.424298	0.368285	0.00776741	0.000939055	0.012395	0.003321	0.00961513	0.0627591	1	0.0188048
PLP2				0	0	0	0	0	2	0	4	0.211436	0.0782331	0.0165413	0.906553	0.946732	0.251601	0.245792	1	1	1	1	1	1
PLS3				0	0	0	0	0	4	0	5	0.0892825	0.0251573	0.0022461	0.955095	0.975352	0.666526	0.647816	1	1	1	1	1	1
PLXNA3				1	0	0	0	1	17	0	27	0.0227368	8.27704e-05	1.88194e-06	0.962312	0.982471	0.835078	0.977243	0.0821492	0.581618	0.0643258	0.490726	1	1
PLXNB3				0	0	0	0	1	20	0	19	0.0255514	0.000102056	2.60768e-06	0.961784	0.982427	0.818961	0.972942	1	1	1	1	1	1
PNCK				0	0	0	0	0	8	0	3	0.125633	0.0337745	0.00424319	0.950148	0.972443	0.583072	0.560948	1	1	1	1	1	1
PNMA3				0	0	0	0	1	7	0	5	0.248143	0.0258692	0.00641927	0.828243	0.968625	0.1005	0.483351	1	1	1	1	1	1
PNMA5				0	0	0	0	0	5	0	10	0.145608	0.033753	0.00491473	0.946155	0.971021	0.526136	0.532705	1	1	1	1	1	1
PNMA6A				0	0	0	0	0	0	0	0	0.203973	0.134465	0.0274273	0.914367	0.882461	0.288157	0.0880187	1	1	1	1	1	1
PNMA6B				0	0	0	0	0	0	0	0	0.203973	0.134465	0.0274273	0.914639	0.883453	0.288157	0.0880187	1	1	1	1	1	1
PNMA6C				0	0	0	0	0	0	0	0	0.203973	0.134465	0.0274273	0.914909	0.884429	0.288157	0.0880187	1	1	1	1	1	1
PNMA6D				0	0	0	0	0	0	0	0	0.203973	0.134465	0.0274273	0.915177	0.885388	0.288157	0.0880187	1	1	1	1	1	1
PNPLA4				0	0	0	0	1	0	1	2	0.0536088	0.0751148	0.00402681	0.958763	0.972922	0.740568	0.566952	1	1	1	1	1	1
POF1B				0	0	0	0	3	6	0	7	0.819756	0.031477	0.0258035	0.39176	0.903724	0.00686741	0.114817	1	1	1	1	1	1
POLA1	hemizygous	X-linked recessive		0	0	0	0	1	17	0	13	0.0299747	0.00309547	9.27858e-05	0.961022	0.981518	0.801211	0.902843	1	1	1	1	1	1
PORCN	X-linked dominant	X-linked dominant		1	0	0	0	0	2	0	2	0.105317	0.0243858	0.00256823	0.953306	0.974406	0.634521	0.625507	0.0259778	0.176871	0.0201944	0.140047	1	1
POU3F4				0	0	0	0	0	6	0	5	0.167245	0.026676	0.00446142	0.939858	0.97217	0.453535	0.553604	1	1	1	1	1	1
PPEF1				0	0	0	0	0	4	0	6	0.0766744	0.0225474	0.00172881	0.957281	0.976707	0.708151	0.686427	1	1	1	1	1	1
PPP1R3F				0	1	0	0	1	3	0	9	0.217296	0.00705413	0.00153283	0.894412	0.977163	0.213142	0.704658	1	0.303469	1	0.245424	1	1
PQBP1	hemizygous	X-linked recessive		0	0	1	0	6	7	2	3	43.6465	0.0474603	2.07147	0.0945157	0.393685	0.000244776	0.000986567	0.0145629	0.117717	1	1	0.00332765	0.0282421
PRAF2				0	0	0	0	0	2	0	2	0.208574	0.0502256	0.0104757	0.909433	0.959952	0.262772	0.358814	1	1	1	1	1	1
PRDX4				0	0	0	0	1	4	0	5	0.355338	0.0492119	0.0174868	0.691734	0.943512	0.0366674	0.233435	1	1	1	1	1	1
PRICKLE3				0	0	0	0	0	7	2	12	0.00230281	0.00778397	1.7925e-05	0.966198	0.981995	0.961169	0.94874	1	1	1	1	1	1
PRKX				0	1	0	0	1	2	0	3	0.32916	0.0306509	0.010089	0.722325	0.960625	0.0420535	0.366525	1	0.148513	1	0.117099	1	1
PRPS1	hemizygous	X-linked recessive; X-linked		0	0	0	0	0	1	0	1	0.180472	0.0497607	0.0089804	0.933478	0.963203	0.396425	0.402312	1	1	1	1	1	1
PRPS2				0	1	0	0	0	1	0	3	0.166323	0.0442673	0.00736269	0.940472	0.966926	0.460296	0.45509	1	0.122154	1	0.0961143	1	1
PRRG1				0	0	0	0	0	3	1	2	0.0302199	0.066377	0.00200591	0.960966	0.976028	0.799368	0.664753	1	1	1	1	1	1
PRRG3				0	0	0	0	2	4	0	1	0.750779	0.0587102	0.0440784	0.439234	0.797747	0.00831866	0.0251219	1	1	1	1	1	1
PSMD10				0	0	0	0	0	2	0	4	0.205797	0.0744704	0.0153258	0.912979	0.94942	0.277667	0.264377	1	1	1	1	1	1
PTCHD1	hemizygous	X-linked recessive		0	0	2	0	1	14	0	7	5378.48	0.0127089	68.3544	0.000895569	0.0316338	1.74129e-06	2.33831e-05	0.000469498	0.0388929	1	1	2.43844e-05	0.00239683
RAB33A				0	0	0	0	0	0	0	2	0.199714	0.0594885	0.0118807	0.918498	0.957011	0.304734	0.326283	1	1	1	1	1	1
RAB39B	hemizygous	X-linked recessive		0	0	0	0	0	2	0	0	0.20518	0.0633802	0.0130044	0.91326	0.954651	0.278908	0.305858	1	1	1	1	1	1
RAB40A				0	0	0	0	1	6	0	6	0.396752	0.0420738	0.0166929	0.663759	0.946118	0.029792	0.243701	1	1	1	1	1	1
RAB40AL				0	0	0	0	0	2	0	11	0.190331	0.105831	0.020143	0.92712	0.929919	0.350918	0.183973	1	1	1	1	1	1
RAB41				0	0	0	0	0	0	0	5	0.185433	0.0918132	0.0170252	0.930716	0.944628	0.37362	0.239036	1	1	1	1	1	1
RAB9A				0	0	0	0	0	1	0	5	0.194228	0.0877793	0.0170492	0.923505	0.944408	0.331376	0.238861	1	1	1	1	1	1
RAB9B				0	0	0	0	0	0	0	2	0.214456	0.0812383	0.017422	0.897361	0.943738	0.221171	0.235021	1	1	1	1	1	1
RAI2				0	0	0	0	0	10	0	9	0.153017	0.0228367	0.0034944	0.943466	0.973535	0.494024	0.58575	1	1	1	1	1	1
RAP2C				0	0	0	0	0	1	0	2	0.224057	0.082176	0.0184121	0.887423	0.939352	0.19475	0.218806	1	1	1	1	1	1
RBBP7				0	1	0	0	0	11	0	4	0.119073	0.0491848	0.00585656	0.951218	0.969377	0.599514	0.496476	1	0.154341	1	0.121654	1	1
RBM10	hemizygous	X-linked recessive		0	0	1	1	1	1	0	8	13.6074	0.30542	4.15597	0.269971	0.313611	0.00242164	0.000448507	0.0515251	0.065941	1	1	0.0117613	0.00404753
RBM3				0	0	0	0	0	3	0	2	0.225114	0.0761324	0.0171385	0.886413	0.944187	0.192119	0.238185	1	1	1	1	1	1
RBM41				0	0	0	0	1	9	1	7	0.040713	0.0418752	0.00170487	0.959945	0.976745	0.768647	0.689064	1	1	1	1	1	1
RBMX				0	0	0	0	0	3	0	8	0.133463	0.0485134	0.00647475	0.948677	0.968342	0.561442	0.481608	1	1	1	1	1	1
RBMX2				0	0	0	0	0	2	1	4	0.0230844	0.0505229	0.00116629	0.962207	0.978059	0.833855	0.737946	1	1	1	1	1	1
RBMXL3				0	0	0	1	0	23	0	35	0.0340755	0.0234405	0.000798746	0.96029	0.978984	0.780594	0.774493	1	0.449255	1	1	1	0.128085
RENBP				0	1	0	0	1	3	0	7	0.229405	0.0267237	0.00613054	0.881616	0.969108	0.180692	0.490413	1	0.179371	1	0.142662	1	1
REPS2				0	0	0	0	0	4	0	7	0.0828862	0.0190473	0.00157876	0.955915	0.977126	0.683018	0.700757	1	1	1	1	1	1
RGAG1				0	0	0	0	0	12	0	28	0.0485761	0.00818811	0.000397747	0.959123	0.980262	0.75162	0.827065	1	1	1	1	1	1
RGAG4				0	0	0	0	1	5	0	12	0.236965	0.0175024	0.00414745	0.869188	0.972551	0.155802	0.56319	1	1	1	1	1	1
RGN				0	0	0	0	0	5	2	7	0.00396941	0.0471162	0.000187023	0.965894	0.980989	0.945645	0.870366	1	1	1	1	1	1
RHOXF1				0	0	0	0	0	2	0	4	0.195734	0.0564563	0.0110504	0.922428	0.958655	0.324613	0.346625	1	1	1	1	1	1
RHOXF2				0	0	0	0	0	2	0	1	0.180105	0.044969	0.00809914	0.933787	0.965464	0.398906	0.430331	1	1	1	1	1	1
RHOXF2B				0	0	0	0	0	2	0	1	0.179894	0.0457907	0.0082375	0.934092	0.964859	0.401388	0.424616	1	1	1	1	1	1
RIBC1				0	0	0	0	0	8	0	6	0.126708	0.0361342	0.00457848	0.949894	0.971891	0.579364	0.547613	1	1	1	1	1	1
RIPPLY1				0	0	0	0	0	1	0	1	0.228893	0.0954091	0.0218385	0.882171	0.923368	0.181933	0.165767	1	1	1	1	1	1
RLIM	hemizygous	X-linked		0	1	0	0	0	11	0	9	0.0866675	0.0194972	0.00168978	0.955371	0.976784	0.671472	0.690614	1	0.190152	1	0.150239	1	1
RNF113A		X-linked dominant	hemizygous	0	0	0	0	0	7	0	4	0.165309	0.030711	0.00507681	0.940834	0.970657	0.464015	0.525469	1	1	1	1	1	1
RNF128				0	0	0	0	1	9	1	6	0.0427829	0.0261751	0.00111985	0.959537	0.97823	0.760867	0.743006	1	1	1	1	1	1
RP1-241P17.4				0	0	0	0	0	1	0	0	0.233673	0.0982389	0.0229557	0.875739	0.918427	0.168796	0.148034	1	1	1	1	1	1
RP11-114H20.1				0	0	0	0	0	0	0	0	0.247009	0.091298	0.0225514	0.831909	0.920296	0.104814	0.154469	1	1	1	1	1	1
RP11-363G10.2				0	0	0	0	0	0	0	0	0.247003	0.0912818	0.0225469	0.833095	0.92075	0.106056	0.1557	1	1	1	1	1	1
RP11-706O15.1				0	0	0	0	0	0	0	0	0.252702	0.099824	0.0252257	0.813188	0.905688	0.0895296	0.120946	1	1	1	1	1	1
RP2				0	0	0	0	1	7	0	6	0.341843	0.0401352	0.0137199	0.70786	0.952341	0.0395505	0.290195	1	1	1	1	1	1
RPA4				0	0	0	0	0	5	0	8	0.196841	0.0488199	0.00960974	0.921542	0.961699	0.320333	0.3811	1	1	1	1	1	1
RPGR				0	0	0	0	0	13	1	18	0.00618042	0.007765	4.79909e-05	0.965406	0.98176	0.925878	0.924783	1	1	1	1	1	1
RPL10				0	2	0	1	1	10	0	5	0.397862	3.42709	1.36351	0.658582	0.460266	0.0292241	0.00155025	1	9.65546e-05	1	0.0021253	1	0.0183257
RPL36A				0	0	0	0	0	2	0	5	0.218805	0.0819208	0.0179247	0.892642	0.941137	0.208847	0.223715	1	1	1	1	1	1
RPL39				0	0	0	0	0	0	0	0	0.252408	0.117028	0.0295388	0.814673	0.867814	0.0907724	0.06616	1	1	1	1	1	1
RPS4X				0	0	0	0	0	4	0	1	0.176417	0.0577286	0.0101843	0.936145	0.960515	0.419878	0.364313	1	1	1	1	1	1
RPS6KA3	hemizygous; X-linked dominant	X-linked dominant		0	0	1	2	1	4	0	3	20.9355	36.164	757.112	0.201754	0.0076661	0.0017097	1.49254e-06	0.0409004	0.00183713	1	1	0.00927024	2.33114e-05
RPS6KA6				0	0	0	0	0	13	1	5	0.00973502	0.0395251	0.000384778	0.964907	0.980318	0.908722	0.829472	1	1	1	1	1	1
RRAGB				0	1	0	0	0	2	0	6	0.129873	0.0488077	0.0063388	0.949379	0.968764	0.571924	0.485078	1	0.126569	1	0.0998262	1	1
RS1				0	1	0	0	0	3	0	4	0.193941	0.0605532	0.0117438	0.923716	0.957272	0.332617	0.330728	1	0.0830451	1	0.0658954	1	1
S100G				0	0	0	0	0	1	0	1	0.258228	0.112408	0.029027	0.789365	0.872699	0.0702129	0.0692585	1	1	1	1	1	1
SAGE1				0	0	0	0	0	14	3	9	0.000220379	0.0129708	2.85849e-06	0.966833	0.982382	0.987791	0.971881	1	1	1	1	1	1
SASH3				0	0	0	0	0	1	0	7	0.137409	0.0592923	0.00814728	0.948046	0.965207	0.552202	0.427137	1	1	1	1	1	1
SAT1				0	0	0	0	0	3	0	6	0.211589	0.0815909	0.0172638	0.90622	0.943963	0.250359	0.237356	1	1	1	1	1	1
SATL1				0	1	0	0	1	8	3	8	0.000674	0.0219574	1.47993e-05	0.966539	0.982065	0.979629	0.952102	1	0.174979	1	0.137909	1	1
SCML1				0	0	0	0	0	1	0	4	0.155562	0.0544236	0.00846626	0.942691	0.964593	0.484783	0.417968	1	1	1	1	1	1
SCML2				0	0	0	0	0	1	0	4	0.0801922	0.02435	0.00195269	0.956706	0.976232	0.696593	0.668845	1	1	1	1	1	1
SEPT6				0	0	0	0	1	3	0	2	0.243134	0.031779	0.00772656	0.851719	0.966372	0.12832	0.444046	1	1	1	1	1	1
SERPINA7				0	1	0	0	0	4	1	7	0.0245016	0.0472543	0.00115781	0.961996	0.978094	0.826191	0.739094	1	0.105999	1	0.0827127	1	1
SH2D1A				0	0	0	0	0	1	0	1	0.225289	0.0896558	0.0201985	0.885902	0.929565	0.190879	0.183944	1	1	1	1	1	1
SH3BGRL				0	0	0	0	0	0	0	5	0.230325	0.1364	0.0314162	0.879918	0.855312	0.177636	0.0585918	1	1	1	1	1	1
SH3KBP1				0	0	0	0	0	6	0	10	0.0861492	0.0167176	0.0014402	0.95544	0.977566	0.67326	0.713434	1	1	1	1	1	1
SHROOM2				1	0	0	1	1	18	1	23	0.00720588	0.007795	5.61698e-05	0.965271	0.981712	0.922382	0.920075	0.0628228	0.161663	0.0490214	0.425311	1	0.150296
SHROOM4				0	0	0	0	0	31	1	36	0.00401933	0.00139411	5.60337e-06	0.96585	0.982315	0.944775	0.965491	1	1	1	1	1	1
SLC10A3				0	0	0	0	0	8	1	3	0.0229909	0.0262997	0.000604653	0.962259	0.979478	0.834531	0.797227	1	1	1	1	1	1
SLC16A2	hemizygous	X-linked		0	0	0	1	1	3	0	4	0.250432	0.785674	0.196758	0.821733	0.71965	0.0949639	0.0118371	1	0.20366	1	1	1	0.0481636
SLC25A14				0	0	0	0	0	0	0	0	0.141186	0.0471817	0.00666139	0.947493	0.968126	0.543717	0.477691	1	1	1	1	1	1
SLC25A43				0	1	0	0	0	6	0	2	0.152798	0.0554192	0.00846792	0.943683	0.964504	0.496504	0.417723	1	0.112696	1	0.0895186	1	1
SLC25A5				0	0	0	0	0	3	0	3	0.180259	0.0486736	0.00877385	0.933633	0.963772	0.397666	0.410013	1	1	1	1	1	1
SLC25A53				0	0	0	0	0	2	0	4	0.178569	0.0521465	0.00931176	0.935137	0.962814	0.409394	0.394492	1	1	1	1	1	1
SLC35A2	X-linked dominant	X-linked dominant		1	2	0	0	0	5	0	7	0.158039	0.0270269	0.00427132	0.942124	0.972389	0.478704	0.55989	0.0158166	0.000716212	0.0123181	0.000349792	1	1
SLC38A5				0	1	0	0	0	7	0	2	0.122957	0.0383938	0.00472078	0.950565	0.971664	0.588671	0.541712	1	0.158433	1	0.125907	1	1
SLC6A14				0	0	0	0	1	6	0	4	0.199243	0.0322363	0.00642286	0.919462	0.968554	0.309286	0.483263	1	1	1	1	1	1
SLC6A8	hemizygous	X-linked recessive		0	1	0	3	2	11	0	6	0.425449	2001.65	851.601	0.623658	0.00526397	0.0230928	1.49254e-06	1	0.000107513	1	0.169793	1	2.02605e-05
SLC7A3				0	0	0	0	0	6	0	11	0.110635	0.0208359	0.00230518	0.952552	0.975177	0.621219	0.643504	1	1	1	1	1	1
SLC9A6	hemizygous	X-linked dominant		0	0	0	0	8	7	0	6	24.2237	0.0132497	0.320956	0.172994	0.639897	0.00146443	0.00860174	1	1	1	1	1	1
SLC9A7				0	0	0	1	0	7	0	12	0.0800222	0.536344	0.0429194	0.956835	0.800688	0.699065	0.0256065	1	0.239399	1	1	1	0.0588693
SLITRK2				0	0	0	0	0	7	0	13	0.0780173	0.0119237	0.000930259	0.957027	0.978663	0.702666	0.765133	1	1	1	1	1	1
SLITRK4				0	0	0	0	0	8	1	13	0.011741	0.0136009	0.000159688	0.964629	0.981117	0.901795	0.879272	1	1	1	1	1	1
SMARCA1				0	1	0	0	1	12	0	5	0.0568386	0.0101047	0.000574334	0.958459	0.979568	0.732885	0.799433	1	0.3115	1	0.251337	1	1
SMIM10				0	0	0	0	0	0	0	0	0.262611	0.0922309	0.0242209	0.777047	0.911689	0.0634236	0.132428	1	1	1	1	1	1
SMIM9				0	0	0	0	0	0	0	1	0.235783	0.10961	0.0258443	0.872556	0.903051	0.162013	0.11464	1	1	1	1	1	1
SMPX				0	0	0	0	0	5	0	1	0.250852	0.118212	0.0296536	0.820367	0.866534	0.0943893	0.0643107	1	1	1	1	1	1
SMS	hemizygous	X-linked recessive		1	0	0	0	0	6	0	2	0.144584	0.0602515	0.00871137	0.946641	0.963958	0.53257	0.411043	0.0183539	0.105414	0.0143525	0.0835161	1	1
SNX12				0	0	0	0	0	1	0	2	0.216978	0.0635317	0.013785	0.894844	0.952179	0.214385	0.289845	1	1	1	1	1	1
SOWAHD				0	0	0	0	0	0	0	0	0.199389	0.0289719	0.00577668	0.919224	0.969642	0.308456	0.499849	1	1	1	1	1	1
SOX3	hemizygous; X-linked dominant	X-linked		0	0	0	0	0	5	0	9	0.1464	0.0108343	0.00158614	0.945859	0.977088	0.523085	0.700073	1	1	1	1	1	1
SPACA5				0	0	0	0	0	0	0	0	0.22341	0.0897261	0.0200457	0.8889	0.930617	0.198475	0.187325	1	1	1	1	1	1
SPACA5B				0	0	0	0	0	0	0	0	0.223546	0.0898646	0.0200889	0.88792	0.93027	0.195992	0.185367	1	1	1	1	1	1
SPANXA1				0	0	0	0	0	0	0	0	0.248347	0.102752	0.0255181	0.825701	0.904388	0.0986905	0.11749	1	1	1	1	1	1
SPANXA2				0	0	0	0	0	0	0	0	0.248314	0.102699	0.0255016	0.826982	0.905042	0.0999326	0.118743	1	1	1	1	1	1
SPANXB1				0	0	0	0	0	0	0	0	0.241965	0.0919042	0.0222376	0.853516	0.921643	0.131378	0.159955	1	1	1	1	1	1
SPANXB2				0	0	0	0	0	0	0	0	0.241965	0.0919039	0.0222375	0.854397	0.922081	0.132619	0.161188	1	1	1	1	1	1
SPANXC				0	0	0	0	0	1	0	1	0.248104	0.0969163	0.0240454	0.829484	0.912247	0.101741	0.134499	1	1	1	1	1	1
SPANXD				0	0	0	0	0	0	0	4	0.245982	0.123391	0.0303521	0.837661	0.863896	0.111028	0.0634005	1	1	1	1	1	1
SPANXN1				0	0	0	0	0	1	0	2	0.258151	0.109388	0.0282386	0.79128	0.875007	0.0714552	0.0745495	1	1	1	1	1	1
SPANXN2				0	0	0	0	0	0	0	1	0.209663	0.0880383	0.0184584	0.90721	0.939088	0.254083	0.216998	1	1	1	1	1	1
SPANXN3				0	0	0	0	0	2	0	0	0.235033	0.0984374	0.023136	0.873207	0.916966	0.163259	0.144957	1	1	1	1	1	1
SPANXN4				0	0	0	0	0	3	0	2	0.23242	0.0920389	0.0213916	0.876965	0.925018	0.171281	0.170143	1	1	1	1	1	1
SPANXN5				0	0	0	0	0	0	0	1	0.259267	0.11796	0.0305832	0.787412	0.862537	0.0689699	0.0625876	1	1	1	1	1	1
SPIN2A				0	0	0	0	0	2	0	3	0.198074	0.0616739	0.012216	0.919935	0.956478	0.31232	0.319579	1	1	1	1	1	1
SPIN2B				0	0	0	0	1	2	0	2	0.410019	0.0611151	0.0250584	0.647712	0.906325	0.02749	0.122434	1	1	1	1	1	1
SPIN3				0	1	0	0	0	1	0	7	0.197736	0.0912831	0.0180499	0.920402	0.940889	0.314802	0.222636	1	0.0805734	1	0.0626688	1	1
SPIN4				0	0	0	0	0	3	0	0	0.193221	0.0562317	0.0108651	0.924958	0.959137	0.339279	0.349767	1	1	1	1	1	1
SRPK3				0	0	0	0	1	10	0	8	0.190477	0.0114909	0.00218875	0.926929	0.975396	0.349678	0.651356	1	1	1	1	1	1
SRPX				0	0	0	0	0	12	1	3	0.016616	0.0764649	0.00127054	0.963479	0.977851	0.86638	0.728604	1	1	1	1	1	1
SRPX2			hemizygous	0	0	0	0	0	9	1	4	0.0138968	0.0361208	0.000501962	0.963966	0.979776	0.88127	0.809631	1	1	1	1	1	1
SSR4				0	0	0	0	0	1	0	0	0.20794	0.0705264	0.0146653	0.91065	0.950491	0.26774	0.273608	1	1	1	1	1	1
SSX1				0	2	0	0	6	5	5	6	0.0016103	0.0768165	0.000123698	0.966369	0.981295	0.969528	0.891342	1	0.00120627	1	0.000733267	1	1
SSX2				0	0	0	0	0	0	0	0	0.208967	0.0843794	0.0176325	0.90881	0.943052	0.260289	0.230213	1	1	1	1	1	1
SSX2B				0	0	0	0	0	0	0	0	0.208914	0.0843244	0.0176166	0.909122	0.943283	0.261531	0.231701	1	1	1	1	1	1
SSX3				0	0	0	0	0	5	0	2	0.215598	0.0830164	0.0178982	0.895273	0.941384	0.215626	0.223898	1	1	1	1	1	1
SSX4				0	0	0	0	0	0	0	0	0.201244	0.084471	0.0169993	0.916746	0.945062	0.295494	0.241581	1	1	1	1	1	1
SSX4B				0	0	0	0	0	0	0	0	0.19945	0.0822255	0.0163999	0.918983	0.947133	0.307215	0.247625	1	1	1	1	1	1
SSX5				0	0	0	0	0	2	0	2	0.197912	0.0664889	0.0131589	0.920169	0.953755	0.313561	0.300545	1	1	1	1	1	1
SSX7				0	0	0	0	1	1	1	3	0.0644994	0.0891302	0.00574884	0.958092	0.969772	0.724119	0.500803	1	1	1	1	1	1
STARD8				0	1	0	0	2	14	0	13	0.188027	0.00260581	0.000489964	0.928242	0.979834	0.357927	0.811238	1	0.352592	1	0.285825	1	1
STS	hemizygous	X-linked recessive		0	0	0	0	2	6	0	10	0.491559	0.0215421	0.0105892	0.554525	0.959837	0.0130567	0.356388	1	1	1	1	1	1
SUV39H1				0	0	0	0	0	3	0	4	0.133109	0.0191782	0.00255278	0.948766	0.974592	0.56268	0.627497	1	1	1	1	1	1
SYAP1				0	0	0	0	0	3	0	2	0.151808	0.0476557	0.0072345	0.944429	0.967235	0.505741	0.460288	1	1	1	1	1	1
SYN1	hemizygous	X-linked recessive; X-linked dominant		0	0	0	0	1	2	0	3	0.192983	0.0102811	0.00198407	0.92516	0.97611	0.33985	0.666148	1	1	1	1	1	1
SYP	hemizygous	X-linked recessive		0	0	0	0	0	5	0	2	0.160594	0.0444388	0.00713658	0.941544	0.967387	0.472264	0.461894	1	1	1	1	1	1
SYTL4				0	0	0	0	0	8	0	7	0.0842397	0.0190388	0.00160383	0.955576	0.977013	0.676292	0.697128	1	1	1	1	1	1
SYTL5				0	0	0	0	1	10	3	15	0.000496189	0.0151475	7.51601e-06	0.966623	0.982225	0.98256	0.960067	1	1	1	1	1	1
TAB3				0	0	0	0	0	8	1	10	0.0109101	0.0162425	0.000177208	0.964768	0.98104	0.904498	0.873583	1	1	1	1	1	1
TAF1	hemizygous	X-linked recessive		0	2	0	3	0	16	0	21	0.00776944	29.3779	0.22825	0.965226	0.673677	0.919473	0.0106731	1	0.000655245	1	0.0966798	1	0.000511024
TAF7L				0	0	0	1	1	4	0	5	0.251159	1.50488	0.377963	0.818979	0.586337	0.0931468	0.0074301	1	0.141141	1	1	1	0.0331992
TAF9B				0	0	0	0	1	2	3	3	0.00140209	0.0730192	0.000102379	0.966454	0.98137	0.971507	0.898339	1	1	1	1	1	1
TAZ	hemizygous	X-linked recessive		0	0	0	0	0	0	0	4	0.156715	0.0605872	0.00949491	0.942465	0.962009	0.482304	0.387503	1	1	1	1	1	1
TBC1D25				0	0	0	0	0	11	0	2	0.0819513	0.0233238	0.00191142	0.956115	0.976312	0.686721	0.671878	1	1	1	1	1	1
TBC1D8B				0	0	0	0	1	11	3	10	0.000293178	0.00881926	2.58562e-06	0.966749	0.982449	0.985548	0.973075	1	1	1	1	1	1
TBL1X				0	0	0	0	0	5	0	2	0.0818032	0.0179396	0.00146752	0.956182	0.977421	0.687954	0.710388	1	1	1	1	1	1
TBX22	hemizygous	X-linked		0	0	0	0	0	11	0	5	0.119277	0.0401405	0.00478783	0.951137	0.971317	0.598279	0.536355	1	1	1	1	1	1
TCEAL1				0	0	1	0	1	1	0	2	83.7061	0.073716	6.17048	0.0580258	0.283792	5.69652e-05	0.000258458	0.00554868	0.0617487	1	1	0.00125716	0.0145323
TCEAL2				0	0	0	0	0	2	0	1	0.202679	0.070895	0.0143689	0.915969	0.950666	0.292454	0.278194	1	1	1	1	1	1
TCEAL3				0	0	0	0	1	1	0	0	0.447715	0.0686555	0.0307381	0.595891	0.861151	0.0194279	0.0615214	1	1	1	1	1	1
TCEAL4				0	0	0	0	2	7	0	2	0.667823	0.05973	0.0398891	0.466858	0.806322	0.00985622	0.0271204	1	1	1	1	1	1
TCEAL5				0	0	0	0	0	0	0	4	0.207977	0.0893081	0.018574	0.910349	0.938821	0.266498	0.215683	1	1	1	1	1	1
TCEAL6				0	0	0	0	0	2	0	3	0.214145	0.0706374	0.0151267	0.898966	0.949602	0.226136	0.26678	1	1	1	1	1	1
TCEAL7				0	0	0	0	0	1	0	3	0.253846	0.0982113	0.0249306	0.810141	0.908788	0.0863813	0.123886	1	1	1	1	1	1
TCEAL8				0	0	0	0	0	2	0	3	0.24637	0.0879748	0.0216744	0.834262	0.923787	0.107299	0.167982	1	1	1	1	1	1
TCEANC				0	0	0	0	0	4	2	10	0.00376031	0.0639179	0.000240351	0.965937	0.980619	0.946678	0.855837	1	1	1	1	1	1
TCP11X1				0	0	0	0	0	0	0	0	0.143152	0.046907	0.00671481	0.946928	0.967835	0.536287	0.473143	1	1	1	1	1	1
TCP11X2				0	0	0	0	0	0	0	0	0.143134	0.0468893	0.00671144	0.947023	0.967908	0.537525	0.474544	1	1	1	1	1	1
TENM1				0	1	0	0	0	22	0	34	0.00226137	8.61356e-05	1.94785e-07	0.966241	0.982559	0.963161	0.988914	1	0.594857	1	0.503333	1	1
TEX11				0	0	0	0	0	10	0	9	0.0455489	0.0154925	0.000705667	0.959301	0.979141	0.754889	0.786951	1	1	1	1	1	1
TEX13A				0	1	0	0	0	6	1	12	0.0224367	0.0395888	0.000888243	0.962416	0.978792	0.837077	0.767839	1	0.134275	1	0.105607	1	1
TEX13B				0	0	0	0	0	3	0	9	0.174133	0.0637294	0.0110974	0.937392	0.958411	0.429938	0.34524	1	1	1	1	1	1
TEX28				0	0	0	0	0	0	0	0	0.200318	0.133533	0.0267491	0.917507	0.895756	0.29977	0.1028	1	1	1	1	1	1
TEX28P1				0	0	0	0	0	0	0	0	0.199593	0.133148	0.0265753	0.918741	0.899537	0.305975	0.109477	1	1	1	1	1	1
TEX28P2				0	0	0	0	0	0	0	0	0.200243	0.133493	0.0267311	0.917757	0.896535	0.30101	0.104095	1	1	1	1	1	1
TFDP3				0	0	0	0	0	6	0	10	0.168223	0.0305995	0.00514754	0.939483	0.970472	0.449819	0.52118	1	1	1	1	1	1
TFE3				1	2	0	2	1	9	0	12	0.223173	28.6155	6.38621	0.889383	0.221317	0.199031	0.00025199	0.0257259	4.74937e-06	0.0200753	0.000878584	1	0.0012689
TGIF2LX				0	0	0	0	0	3	0	11	0.209685	0.0952791	0.0199786	0.906883	0.9313	0.252843	0.188612	1	1	1	1	1	1
THOC2	hemizygous	X-linked recessive		0	0	0	2	0	11	0	7	0.0156935	6.78488	0.106478	0.963626	0.75438	0.870307	0.0154609	1	0.0780611	1	1	1	0.00481776
TIMM17B				0	0	0	0	0	2	0	0	0.180695	0.0651121	0.0117654	0.933166	0.957142	0.393945	0.329203	1	1	1	1	1	1
TIMM8A		X-linked recessive		0	0	0	0	0	0	0	1	0.246279	0.10741	0.0264528	0.835412	0.900973	0.108543	0.111423	1	1	1	1	1	1
TIMP1				0	0	0	0	0	2	0	8	0.204519	0.0763357	0.0156121	0.913818	0.948867	0.28139	0.259205	1	1	1	1	1	1
TKTL1				0	0	0	0	1	10	0	15	0.19581	0.0144427	0.00282803	0.922209	0.974122	0.323372	0.609593	1	1	1	1	1	1
TLR7				0	0	0	0	0	12	0	15	0.0685731	0.00777043	0.000532842	0.957782	0.979717	0.718573	0.805556	1	1	1	1	1	1
TLR8				0	0	0	0	1	8	1	14	0.0183971	0.00683954	0.000125828	0.962929	0.98127	0.851873	0.890385	1	1	1	1	1	1
TM4SF2				0	0	0	0	0	0	0	0	0.17484	0.0575105	0.0100552	0.936706	0.960735	0.424848	0.368145	1	1	1	1	1	1
TMEM164				0	0	0	0	0	1	0	0	0.180691	0.0522309	0.00943763	0.933322	0.962416	0.395184	0.392105	1	1	1	1	1	1
TMEM185A				0	0	0	0	0	1	0	1	0.133778	0.0452798	0.00605746	0.948587	0.969175	0.560204	0.492631	1	1	1	1	1	1
TMEM187				0	0	0	0	0	5	0	4	0.200342	0.0353667	0.00708542	0.917255	0.967537	0.298528	0.464205	1	1	1	1	1	1
TMEM255A				0	0	0	0	0	5	0	4	0.157566	0.0463323	0.00730038	0.942238	0.967004	0.4805	0.457014	1	1	1	1	1	1
TMEM257				0	0	0	0	0	3	0	1	0.249412	0.100115	0.0249698	0.823077	0.907573	0.0962072	0.123319	1	1	1	1	1	1
TMEM27				0	0	0	0	0	1	0	2	0.201801	0.0767397	0.0154861	0.91623	0.949237	0.293698	0.261687	1	1	1	1	1	1
TMEM31				0	0	0	0	0	3	0	5	0.206826	0.0801026	0.0165673	0.911539	0.946528	0.271462	0.245297	1	1	1	1	1	1
TMEM35				0	0	0	0	0	3	0	1	0.221166	0.0755069	0.0166996	0.890336	0.94591	0.202083	0.243578	1	1	1	1	1	1
TMEM47				0	0	0	0	0	0	0	0	0.213484	0.0797357	0.0170223	0.901272	0.944846	0.233586	0.240267	1	1	1	1	1	1
TMLHE				0	0	0	0	0	4	0	6	0.141733	0.0392868	0.00556826	0.9474	0.969966	0.542479	0.505978	1	1	1	1	1	1
TMSB15A				0	0	0	0	0	0	0	0	0.26874	0.124702	0.0335124	0.765556	0.838292	0.0572092	0.0468299	1	1	1	1	1	1
TMSB15B				0	0	0	0	0	0	0	2	0.266537	0.140112	0.0373451	0.772595	0.811646	0.0609376	0.0287535	1	1	1	1	1	1
TMSB4X				0	0	0	0	0	0	0	0	0.268599	0.116694	0.0313438	0.767953	0.856817	0.058452	0.0599585	1	1	1	1	1	1
TNMD				0	0	0	0	2	6	0	4	0.600138	0.0488247	0.0293016	0.503545	0.870303	0.0106346	0.066505	1	1	1	1	1	1
TRAPPC2	hemizygous	X-linked recessive		0	0	0	0	0	0	0	1	0.214773	0.0891439	0.0191457	0.89612	0.935131	0.217447	0.202495	1	1	1	1	1	1
TREX2				0	0	0	0	0	1	0	0	0.200651	0.0362632	0.00727626	0.917001	0.967081	0.297287	0.45832	1	1	1	1	1	1
TRMT2B				0	0	0	0	1	1	2	4	0.00482575	0.042092	0.000203126	0.96554	0.980832	0.934955	0.864588	1	1	1	1	1	1
TRO				0	0	0	0	1	10	1	23	0.0124429	0.00525934	6.54415e-05	0.964395	0.981664	0.896268	0.916119	1	1	1	1	1	1
TRPC5				0	0	0	1	0	9	0	13	0.0567328	0.323332	0.0183436	0.95852	0.939613	0.734116	0.219085	1	0.272937	1	1	1	0.0691811
TSC22D3				0	0	0	0	1	3	0	2	0.422034	0.061731	0.0260526	0.6361	0.901675	0.024708	0.113038	1	1	1	1	1	1
TSPAN6				0	0	0	0	0	3	1	3	0.0276713	0.0605713	0.00167608	0.961351	0.976861	0.80877	0.6919	1	1	1	1	1	1
TSPAN7	hemizygous	X-linked recessive		0	0	0	0	0	2	0	1	0.177431	0.0552286	0.00979926	0.935861	0.961489	0.416833	0.377399	1	1	1	1	1	1
TSPYL2				0	1	0	1	0	16	0	17	0.0964537	0.319814	0.0308472	0.954676	0.859736	0.657047	0.0612311	1	0.0342594	1	0.199229	1	0.0634932
TSR2				0	0	0	0	0	5	0	1	0.205889	0.0825304	0.0169921	0.912695	0.945276	0.276426	0.241674	1	1	1	1	1	1
TXLNG				0	1	0	0	0	2	0	4	0.0985212	0.0286688	0.00282448	0.954393	0.97417	0.652096	0.610199	1	0.169587	1	0.134572	1	1
U82695.9				0	0	0	0	0	4	0	6	0.239655	0.0761281	0.0182445	0.864882	0.939873	0.148776	0.219927	1	1	1	1	1	1
UBA1				0	0	0	1	0	14	0	13	0.0303101	0.116894	0.00354306	0.960911	0.973435	0.798025	0.583407	1	0.354403	1	1	1	0.0939814
UBE2A	hemizygous	X-linked recessive		0	0	0	0	0	4	0	0	0.218519	0.0852239	0.018623	0.893535	0.938281	0.211331	0.214261	1	1	1	1	1	1
UBE2NL				0	0	0	0	0	3	0	6	0.237112	0.0813644	0.0192925	0.868491	0.934214	0.155245	0.198758	1	1	1	1	1	1
UBL4A				0	1	0	0	0	2	0	1	0.194562	0.0653392	0.0127125	0.923078	0.955371	0.328895	0.312128	1	0.0750389	1	0.0585327	1	1
UBQLN2				0	0	0	0	0	12	0	8	0.124734	0.0174739	0.00217959	0.950232	0.975482	0.584312	0.652531	1	1	1	1	1	1
UPRT				0	0	0	0	1	4	0	7	0.314715	0.049326	0.0155236	0.738434	0.949053	0.0465808	0.26107	1	1	1	1	1	1
USP11				0	2	0	0	0	7	0	10	0.0410574	0.00326448	0.000134031	0.959888	0.981219	0.768052	0.88799	1	0.0673312	1	0.0430058	1	1
USP26				0	0	0	0	2	11	2	19	0.00692632	0.0142809	9.89138e-05	0.965316	0.981493	0.922833	0.900392	1	1	1	1	1	1
USP27X	hemizygous	X-linked recessive		0	0	0	0	0	2	0	2	0.156164	0.0325061	0.0050763	0.942578	0.970718	0.483544	0.525907	1	1	1	1	1	1
USP51				0	0	0	0	0	7	0	4	0.102962	0.0122243	0.00125864	0.95382	0.977886	0.640986	0.729152	1	1	1	1	1	1
UTP14A				0	0	0	0	0	4	0	10	0.0616798	0.0211472	0.00130435	0.958276	0.977816	0.72769	0.724895	1	1	1	1	1	1
UXT				0	0	0	0	0	4	0	3	0.197356	0.0700795	0.0138306	0.92109	0.951851	0.317851	0.287649	1	1	1	1	1	1
VBP1				0	0	0	0	0	1	1	4	0.0305167	0.0937892	0.00286214	0.960855	0.974074	0.795518	0.608608	1	1	1	1	1	1
VCX				0	0	0	0	0	0	0	0	0.236072	0.114934	0.0271328	0.871232	0.891675	0.15953	0.0958654	1	1	1	1	1	1
VCX2				0	0	0	0	0	2	0	1	0.252143	0.108274	0.0273004	0.816132	0.887258	0.0920154	0.0899445	1	1	1	1	1	1
VCX3A				0	0	0	0	0	0	0	0	0.236218	0.101741	0.0240331	0.870558	0.912798	0.158287	0.135737	1	1	1	1	1	1
VCX3B				0	0	0	0	0	0	0	0	0.222604	0.101787	0.0226581	0.889861	0.918903	0.20084	0.152273	1	1	1	1	1	1
VGLL1				0	0	0	0	0	3	0	3	0.192829	0.0551243	0.0106295	0.925361	0.959722	0.341091	0.355689	1	1	1	1	1	1
VMA21				0	0	0	0	0	0	0	0	0.206378	0.0669518	0.0138174	0.911831	0.952015	0.272703	0.288878	1	1	1	1	1	1
VSIG1				0	0	0	0	1	12	1	5	0.0402654	0.0593878	0.00239127	0.960061	0.975	0.770489	0.63836	1	1	1	1	1	1
VSIG4				0	0	0	0	0	8	1	9	0.0219016	0.0369837	0.000810005	0.962571	0.97892	0.839335	0.772918	1	1	1	1	1	1
WAS				0	0	0	0	0	2	0	4	0.10527	0.0303142	0.00319118	0.95338	0.973734	0.635757	0.594198	1	1	1	1	1	1
WBP5				0	0	0	0	0	2	0	1	0.246274	0.101029	0.0248809	0.836545	0.909971	0.109785	0.125348	1	1	1	1	1	1
WDR13				1	0	0	0	0	3	0	5	0.129444	0.0140334	0.00181653	0.949466	0.97655	0.573163	0.678299	0.0206815	0.216996	0.016054	0.17229	1	1
WDR44				0	1	0	0	0	11	0	6	0.055467	0.0165824	0.000919777	0.958581	0.978695	0.736941	0.765872	1	0.23985	1	0.191838	1	1
WNK3				0	0	0	0	0	17	0	20	0.0119664	0.00105611	1.26378e-05	0.964583	0.982088	0.901108	0.953995	1	1	1	1	1	1
WWC3				1	0	0	0	1	7	1	11	0.0100717	0.00185659	1.8699e-05	0.964861	0.981972	0.906743	0.94817	0.0547722	0.38936	0.0427437	0.317867	1	1
XAGE1A				0	0	0	0	0	0	0	0	0.255127	0.135332	0.0345268	0.798586	0.828172	0.0827853	0.0434639	1	1	1	1	1	1
XAGE1B				0	0	0	0	0	0	0	0	0.255127	0.135332	0.0345268	0.800328	0.830297	0.0827853	0.0434639	1	1	1	1	1	1
XAGE1C				0	0	0	0	0	0	0	0	0.255127	0.135332	0.0345268	0.802038	0.83237	0.0827853	0.0434639	1	1	1	1	1	1
XAGE1D				0	0	0	0	0	0	0	0	0.255127	0.135332	0.0345268	0.803718	0.834392	0.0827853	0.0434639	1	1	1	1	1	1
XAGE1E				0	0	0	0	0	0	0	0	0.255127	0.135332	0.0345268	0.805367	0.836365	0.0827853	0.0434639	1	1	1	1	1	1
XAGE2				0	0	0	0	0	0	0	0	0.230579	0.10378	0.0239295	0.878165	0.913342	0.173909	0.137298	1	1	1	1	1	1
XAGE2B				0	0	0	0	0	0	0	0	0.230568	0.103759	0.0239235	0.878756	0.913879	0.175151	0.138531	1	1	1	1	1	1
XAGE3				0	0	0	0	0	4	0	1	0.229807	0.106467	0.0244669	0.881056	0.910551	0.18012	0.127874	1	1	1	1	1	1
XAGE5				0	0	0	0	0	3	0	4	0.213968	0.0988282	0.021146	0.899359	0.925816	0.227377	0.172326	1	1	1	1	1	1
XIAP				0	0	0	0	0	4	1	2	0.018237	0.0403325	0.000735544	0.962979	0.97911	0.852547	0.783346	1	1	1	1	1	1
XK				0	0	0	0	0	6	0	3	0.145036	0.0354269	0.00513818	0.94635	0.970534	0.528853	0.521708	1	1	1	1	1	1
XKRX				0	0	0	0	1	8	1	8	0.0418031	0.0312336	0.00130566	0.959713	0.97778	0.764357	0.724637	1	1	1	1	1	1
XPNPEP2				0	0	0	0	1	5	1	12	0.0216776	0.0229458	0.000497411	0.962673	0.979805	0.841381	0.810229	1	1	1	1	1	1
YIPF6				0	0	0	0	0	4	0	0	0.186	0.0744015	0.0138387	0.930375	0.951685	0.371138	0.287253	1	1	1	1	1	1
YY2				0	0	0	0	0	7	0	11	0.168024	0.0299679	0.00503535	0.939609	0.970779	0.451057	0.527245	1	1	1	1	1	1
ZBTB33				0	0	0	0	0	12	0	12	0.11418	0.0173266	0.00197835	0.952089	0.976151	0.613249	0.666349	1	1	1	1	1	1
ZC3H12B				0	2	0	0	1	7	0	12	0.137808	0.00950559	0.00130994	0.947954	0.977745	0.550962	0.724025	1	0.0362539	1	0.0224935	1	1
ZCCHC12				0	0	0	0	0	6	0	10	0.159678	0.0315007	0.00502995	0.941661	0.97084	0.473503	0.527597	1	1	1	1	1	1
ZCCHC13				0	0	0	0	0	3	0	4	0.204314	0.0636828	0.0130113	0.914093	0.954504	0.282632	0.305614	1	1	1	1	1	1
ZCCHC16				0	0	0	0	0	6	0	8	0.170971	0.050367	0.00861129	0.938457	0.964142	0.44057	0.413704	1	1	1	1	1	1
ZCCHC18				0	0	0	0	3	3	0	11	1.45196	0.0709537	0.103022	0.335786	0.75867	0.0050505	0.0156358	1	1	1	1	1	1
ZCCHC5				0	0	0	0	2	8	2	6	0.0130298	0.0387585	0.000505015	0.964206	0.979746	0.890412	0.809236	1	1	1	1	1	1
ZDHHC15			X-linked dominant	0	0	0	0	0	4	0	6	0.141778	0.046999	0.00666345	0.947306	0.968054	0.541239	0.47648	1	1	1	1	1	1
ZDHHC9	hemizygous			0	0	0	1	1	2	0	5	0.304388	2.22296	0.676642	0.741431	0.514191	0.0494005	0.00400796	1	0.118824	1	1	1	0.026816
ZFP92				0	0	0	0	0	5	0	9	0.142925	0.0140795	0.00201231	0.947118	0.975946	0.538764	0.664334	1	1	1	1	1	1
ZFX				0	1	1	1	1	9	0	9	28.6318	0.467143	13.3751	0.141681	0.142603	0.00111418	0.000141791	0.0329145	0.00265578	1	0.188039	0.00746008	0.00177052
ZIC3	hemizygous	X-linked recessive		0	0	0	0	0	3	0	3	0.15083	0.0141724	0.00213761	0.944742	0.975652	0.509455	0.654474	1	1	1	1	1	1
ZMAT1				0	0	0	0	0	7	1	10	0.0146356	0.0282575	0.000413565	0.963724	0.980206	0.87532	0.824547	1	1	1	1	1	1
ZMYM3				0	0	0	1	0	18	0	14	0.0247436	0.0830924	0.002056	0.961943	0.975821	0.824847	0.660264	1	0.398026	1	1	1	0.107017
ZNF157				0	0	0	0	2	5	0	10	0.524595	0.0345931	0.0181474	0.545186	0.940385	0.0126667	0.222016	1	1	1	1	1	1
ZNF182				0	0	0	0	0	7	0	6	0.100949	0.024472	0.00247043	0.954251	0.97491	0.649482	0.633246	1	1	1	1	1	1
ZNF185				0	0	0	0	0	14	2	10	0.00152366	0.0142835	2.17632e-05	0.966412	0.981925	0.970404	0.945555	1	1	1	1	1	1
ZNF275				0	0	0	0	1	5	0	6	0.262386	0.0168358	0.00441748	0.779205	0.97228	0.0639891	0.55483	1	1	1	1	1	1
ZNF280C				0	0	0	0	0	2	0	10	0.0868302	0.0472013	0.0040985	0.955302	0.972605	0.670235	0.564316	1	1	1	1	1	1
ZNF41				0	0	0	0	0	9	1	17	0.0132927	0.0175835	0.000233731	0.96411	0.980646	0.888724	0.857153	1	1	1	1	1	1
ZNF449				0	0	0	0	0	6	0	3	0.117311	0.0378148	0.00443609	0.951459	0.972225	0.60378	0.554313	1	1	1	1	1	1
ZNF630				0	1	0	0	0	8	1	10	0.0167857	0.0226011	0.000379376	0.96338	0.980345	0.86381	0.830266	1	0.165107	1	0.129805	1	1
ZNF645				0	0	0	0	0	5	0	8	0.133013	0.030738	0.00408856	0.948854	0.972658	0.563917	0.564734	1	1	1	1	1	1
ZNF674				0	0	0	0	1	9	0	8	0.232354	0.027825	0.00646525	0.877568	0.968413	0.171846	0.481844	1	1	1	1	1	1
ZNF711	hemizygous	X-linked		1	1	0	1	0	7	0	9	0.0748331	0.631688	0.0472712	0.957533	0.791597	0.713106	0.0238649	0.0345727	0.00193649	0.0268951	0.0152487	1	0.0532691
ZNF75D				0	0	0	0	0	7	1	3	0.0185247	0.0454287	0.000841552	0.962776	0.978889	0.849369	0.771173	1	1	1	1	1	1
ZNF81				0	0	0	0	0	9	0	13	0.111014	0.0230191	0.00255543	0.952475	0.974545	0.619983	0.627098	1	1	1	1	1	1
ZRSR2				0	0	0	0	0	4	0	3	0.0840389	0.0240808	0.00202372	0.955712	0.975863	0.678756	0.662457	1	1	1	1	1	1
ZXDA				0	0	0	0	0	10	0	7	0.102905	0.00544951	0.000560781	0.953892	0.979598	0.642221	0.802194	1	1	1	1	1	1
ZXDB				0	1	0	0	0	5	0	5	0.102075	0.0045134	0.000460706	0.954108	0.979979	0.646188	0.817268	1	0.300994	1	0.241063	1	1
